# Supplementary material for: On the ozonolysis of unsaturated tosylhydrazones as a direct approach to diazocarbonyl compounds
Source: Royal Society of Chemistry journal article supplement (doi:10.1039/c8ob00435h), 2018-01-01
Supplement: c8ob00435h1.pdf [file c8ob00435h1.pdf]

**On the ozonolysis of unsaturated tosylhydrazones as a direct  
approach to diazocarbonyl compounds**

Younes Fegheh-Hassanpour, Faisal Ebrahim, Tanzeel Arif, Herman O. Sintim,  
Timothy D. W. Claridge, Nader T. Amin and David M. Hodgson\*

Department of Chemistry, Chemistry Research Laboratory,  
University of Oxford, Mansfield Road, Oxford OX1 3TA, United Kingdom  
[david.hodgson@chem.ox.ac.uk](mailto:david.hodgson@chem.ox.ac.uk)

## Table of Contents

|                                                            |           |
|------------------------------------------------------------|-----------|
| <b>Model Study for Selective Ozonolysis.....</b>           | <b>3</b>  |
| <b>Single Crystal X-ray Diffraction Determination.....</b> | <b>4</b>  |
| <b>NMR exchange and NOE studies.....</b>                   | <b>5</b>  |
| <b>Spectra .....</b>                                       | <b>9</b>  |
| <b>References .....</b>                                    | <b>45</b> |

## Model Study for Selective Ozonolysis

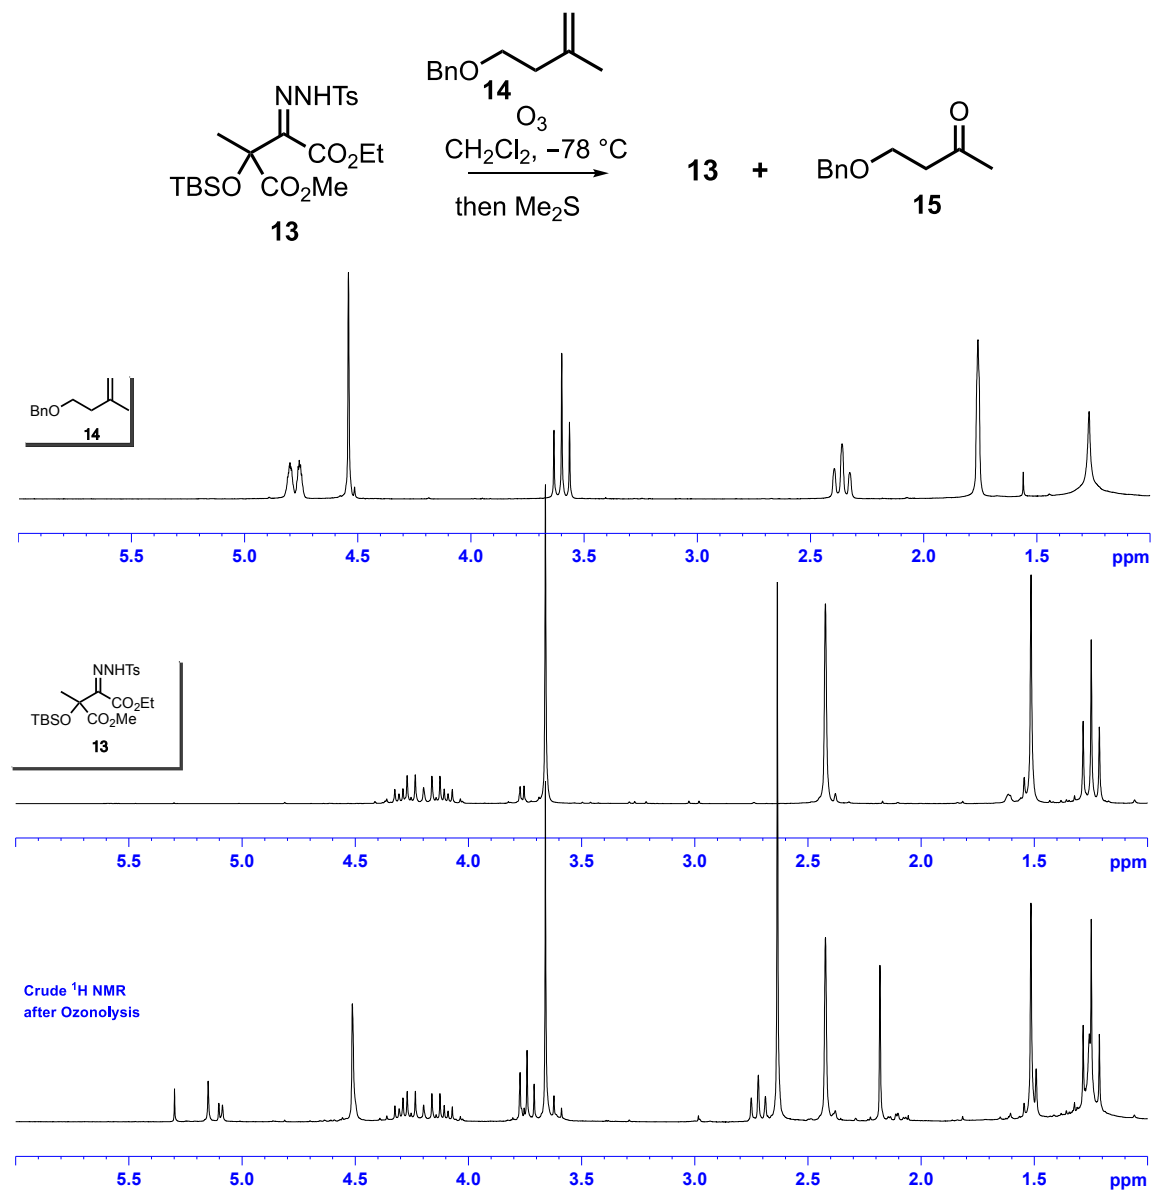

**Fig S1.** <sup>1</sup>H NMR (200 MHz, CDCl<sub>3</sub>) comparison of alkene **14** and model hydrazone **13** with crude product from ozonolysis of **14** and **13**.

### Single Crystal X-ray Diffraction Determination

Low temperature single crystal X-ray diffraction data for tetrahydropyridazinol **35** were collected with a (Rigaku) Oxford Diffraction SuperNova A diffractometer at 150 K. Data were reduced using the CrysAlisPro. All structures were solved *ab initio* using SuperFlip<sup>1</sup> and the structures were refined using CRYSTALS.<sup>2</sup> Further details about the refinement are documented in the CIF. The crystallographic data have been deposited with the CCDC as entry 1815202. Crystals suitable for X-ray diffraction were grown by vapour diffusion of pentane into a concentrated solution of **35** in benzene.

|                                                              |                                                                 |
|--------------------------------------------------------------|-----------------------------------------------------------------|
| Compound Number                                              | <b>35</b>                                                       |
| Moiety Formula                                               | C <sub>14</sub> H <sub>18</sub> N <sub>2</sub> O <sub>5</sub> S |
| CCDC                                                         | 1815202                                                         |
| Space Group                                                  | P 2 <sub>1</sub> /c                                             |
| a [Å]                                                        | 10.0967(3)                                                      |
| b [Å]                                                        | 11.1751(3)                                                      |
| c [Å]                                                        | 13.8100(4)                                                      |
| α [°]                                                        | 90                                                              |
| β [°]                                                        | 104.850(3)                                                      |
| γ [°]                                                        | 90                                                              |
| V [Å <sup>3</sup> ]                                          | 1506.16(8)                                                      |
| Z                                                            | 4                                                               |
| T [K]                                                        | 150                                                             |
| Total Reflections                                            | 14431                                                           |
| R <sub>int</sub>                                             | 0.0218                                                          |
| Reflections,<br>Restraints,<br>Parameters<br>(I>-3.0/ σ (I)) | 3124, 0, 199                                                    |
| Min. and Max.<br>Residual Density,<br>[eÅ <sup>-3</sup> ]    | -0.40, 0.28                                                     |
| R <sub>1</sub> (I>2σ(I))                                     | 0.0299                                                          |
| wR <sub>2</sub>                                              | 0.0781                                                          |

**Table S1.** Summary of X-ray crystallographic data for tetrahydropyridazinol **35**

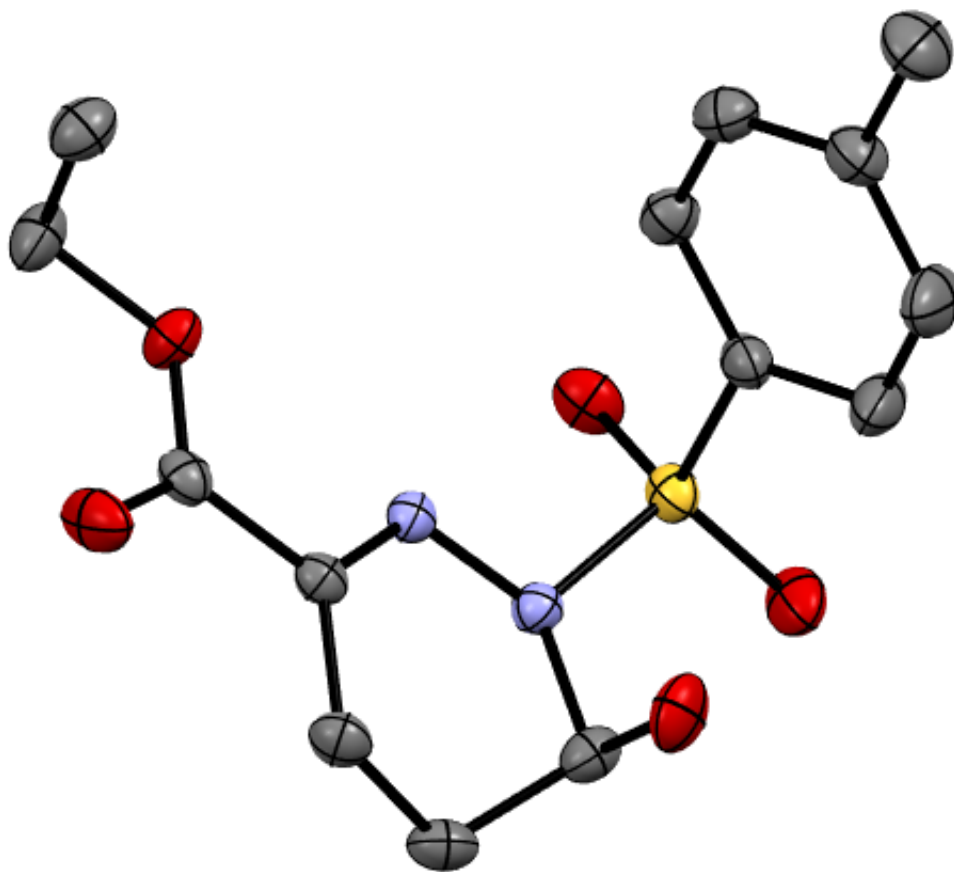

**Fig S2.** Solid state structure of tetrahydropyridazinol **35**. Displacement ellipsoid plots are drawn at 50% probability. Hydrogen atoms are omitted for clarity.

### NMR exchange and NOE studies

NMR investigations of *s-cis/trans* isomerism in  $\alpha$ -diazoaldehyde **41**, arising from partial double bond character in the  $\text{N}_2\text{C}=\text{CHO}$  bond, were undertaken on a sample in  $\text{CDCl}_3$  at temperatures from 298 to 233 K. At 298 K there was clear evidence of isomer exchange between *s-cis* and *s-trans* forms in 1D NOESY spectra. At 233 K this process was slowed sufficiently such that no exchange between isomers could be detected. Under these conditions, NOEs between the aldehydic protons and neighboring  $\text{CH}_2$  protons indicated the major isomer ( $\sim 82\%$ ) to adopt the *s-trans* conformation (Fig. S3).

To investigate the barrier to rotation between isomers, a series of 1D magnetisation transfer experiments were undertaken over a range of temperatures from 263 to 298 K. Probe temperatures were pre-calibrated using a methanol standard. 1D EXSY experiments

were recorded using the Bruker selective 1D NOESY sequence *selnogp* with selection of the major rotamer –CHO proton using a 80 ms Gaussian 180° pulse. Chemical exchange to the minor rotamer was monitored by increasing the exchange mixing times from 20 to 500 ms. Plots of the normalised exchange peak intensity ( $I_{\text{minor}}/I_{\text{major}}$ ) *versus* mixing time were used to derive exchange rate constants from the initial, linear regions of build-up profiles (Fig. S4). These data (Table S2) were used to derive thermodynamic parameters from the respective Eyring plot (Fig. S5) and Arrhenius plot (Fig. S6):  $\Delta H^\ddagger = 72.8 \pm 0.4 \text{ kJ mol}^{-1}$ ;  $\Delta S^\ddagger = -3.5 \pm 1.3 \text{ J K}^{-1} \text{ mol}^{-1}$ ;  $\Delta G^\ddagger (298 \text{ K}) = 73.8 \pm 0.1 \text{ kJ mol}^{-1}$ ;  $E_a = 75.1 \pm 0.4 \text{ kJ mol}^{-1}$ .

|                                      | Normalised Exchange peak intensity |        |        |        |        |        |        |
|--------------------------------------|------------------------------------|--------|--------|--------|--------|--------|--------|
| Mixing time /s                       | 263 K                              | 273 K  | 278 K  | 283 K  | 288 K  | 293 K  | 298 K  |
| 0.02                                 | -                                  | 0.0009 | 0.0023 | 0.0038 | 0.0057 | 0.0099 | 0.0177 |
| 0.05                                 | 0.0002                             | 0.0026 | 0.0037 | 0.0078 | 0.0137 | 0.0237 | 0.0397 |
| 0.1                                  | 0.0014                             | 0.0044 | 0.0089 | 0.0159 | 0.0278 | 0.0466 | 0.0740 |
| 0.15                                 | 0.0020                             | 0.0071 | 0.0118 | 0.0241 | 0.0406 | 0.0661 | 0.1015 |
| 0.2                                  | 0.0030                             | 0.0095 | 0.0167 | 0.0306 | 0.0526 | 0.0829 | 0.1254 |
| 0.25                                 | 0.0034                             | 0.0114 | 0.0192 | 0.0386 | 0.0631 | 0.0997 | 0.1445 |
| 0.3                                  | 0.0038                             | 0.0135 | 0.0242 | 0.0452 | 0.0738 | 0.1134 | 0.1593 |
| 0.5                                  | 0.0063                             | 0.0222 | 0.0392 | 0.0686 | 0.1092 | 0.1546 | 0.1952 |
|                                      |                                    |        |        |        |        |        |        |
| Rate constant<br>( $\text{s}^{-1}$ ) | 0.013                              | 0.044  | 0.078  | 0.152  | 0.262  | 0.434  | 0.702  |
| Standard error                       | 0.0007                             | 0.0006 | 0.0015 | 0.0036 | 0.0047 | 0.0123 | 0.0125 |

**Table S2.** 1D EXSY normalised exchange peak intensities as a function of mixing times for  $\alpha$ -diazoaldehyde **41**, recorded for temperatures from 263 to 298 K. Exchange rate constants were derived from linear regions of these build-up profiles. Standard errors were derived using the LINEST function of Excel and were used to estimate upper and lower limits of thermodynamic parameters.

a)

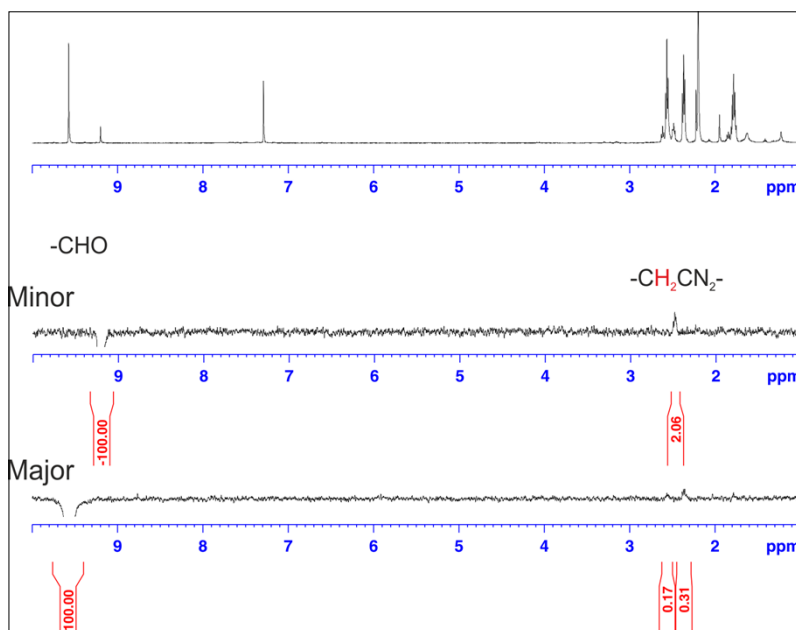

b)

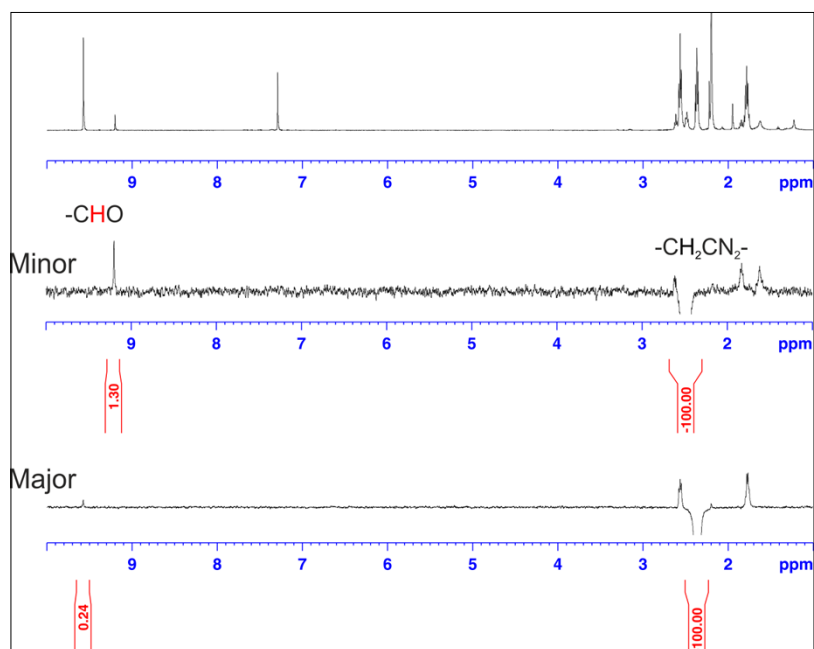

**Fig S3.** 1D NOESY spectra (800 ms mixing) at 233 K with reference 1D  $^1\text{H}$  spectrum shown above. a) Irradiation of aldehyde protons; b) irradiation of -CH<sub>2</sub>CN<sub>2</sub>- protons. Integrals in NOESY spectra are intended to illustrate relative intensity differences only.

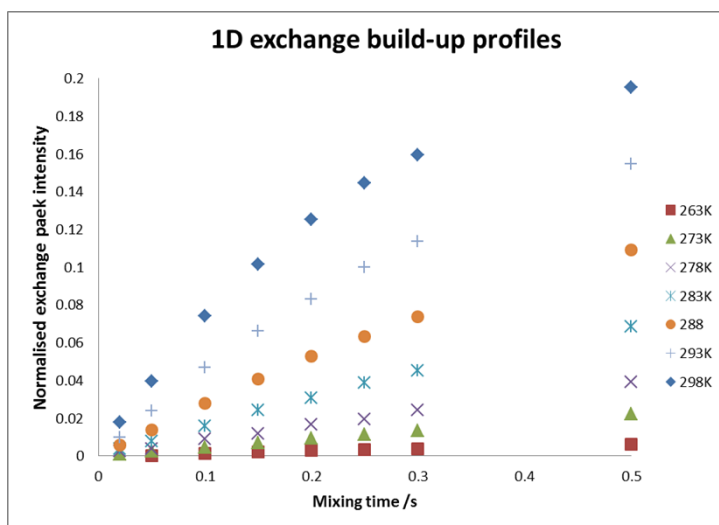

**Fig S4.** Temperature dependent 1D EXSY build-up profiles for  $\alpha$ -diazoaldehyde **41**.

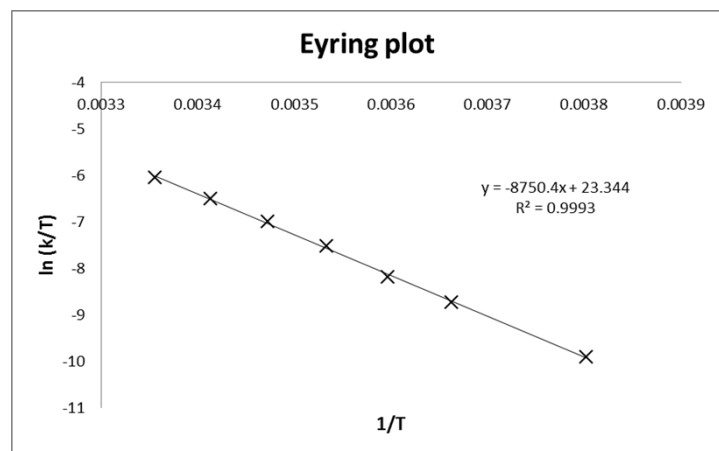

**Fig S5.** Eyring plot for  $\alpha$ -diazoaldehyde **41**.

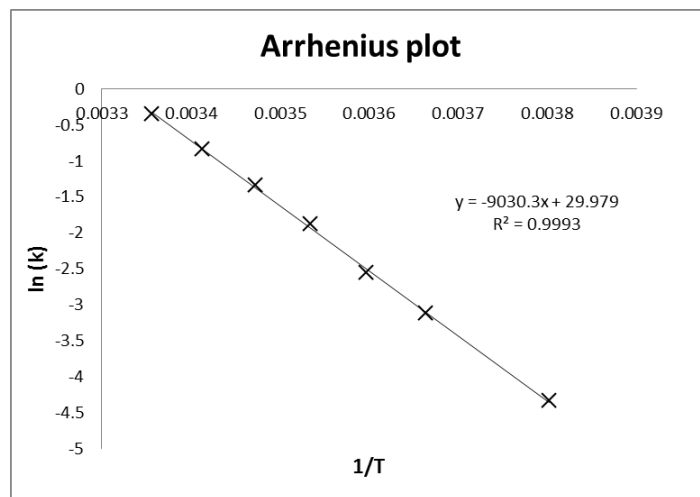

**Fig S6.** Arrhenius plot for  $\alpha$ -diazoaldehyde **41**.



# Spectra

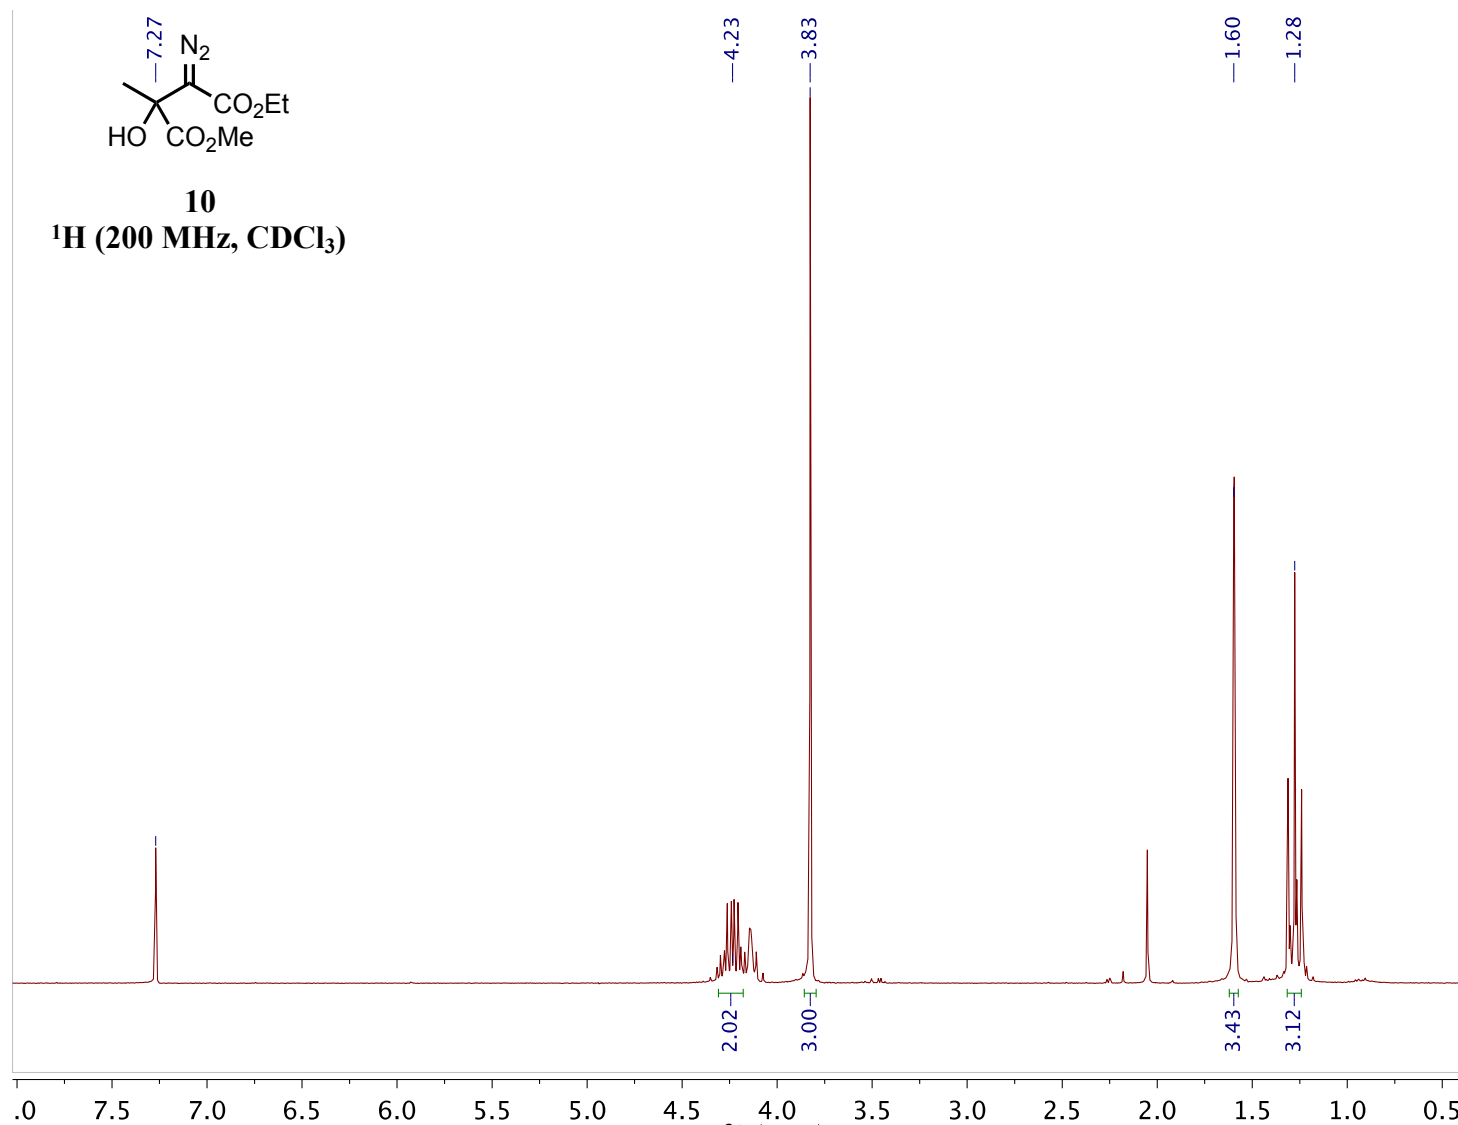

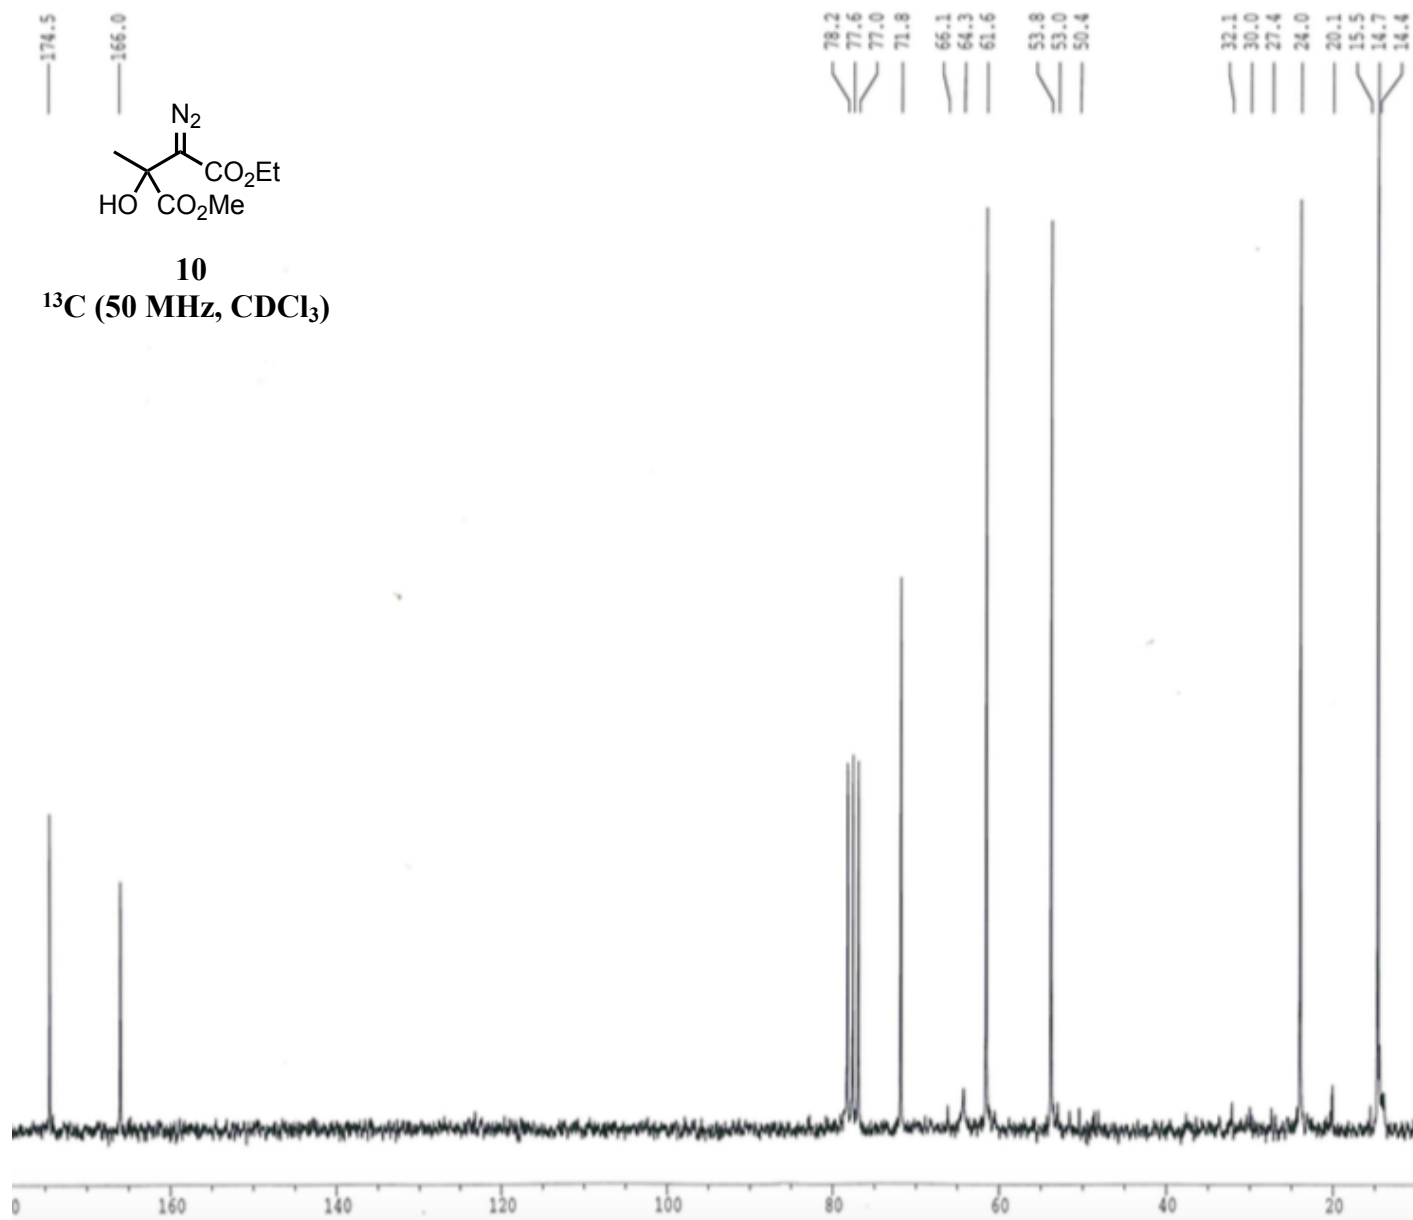

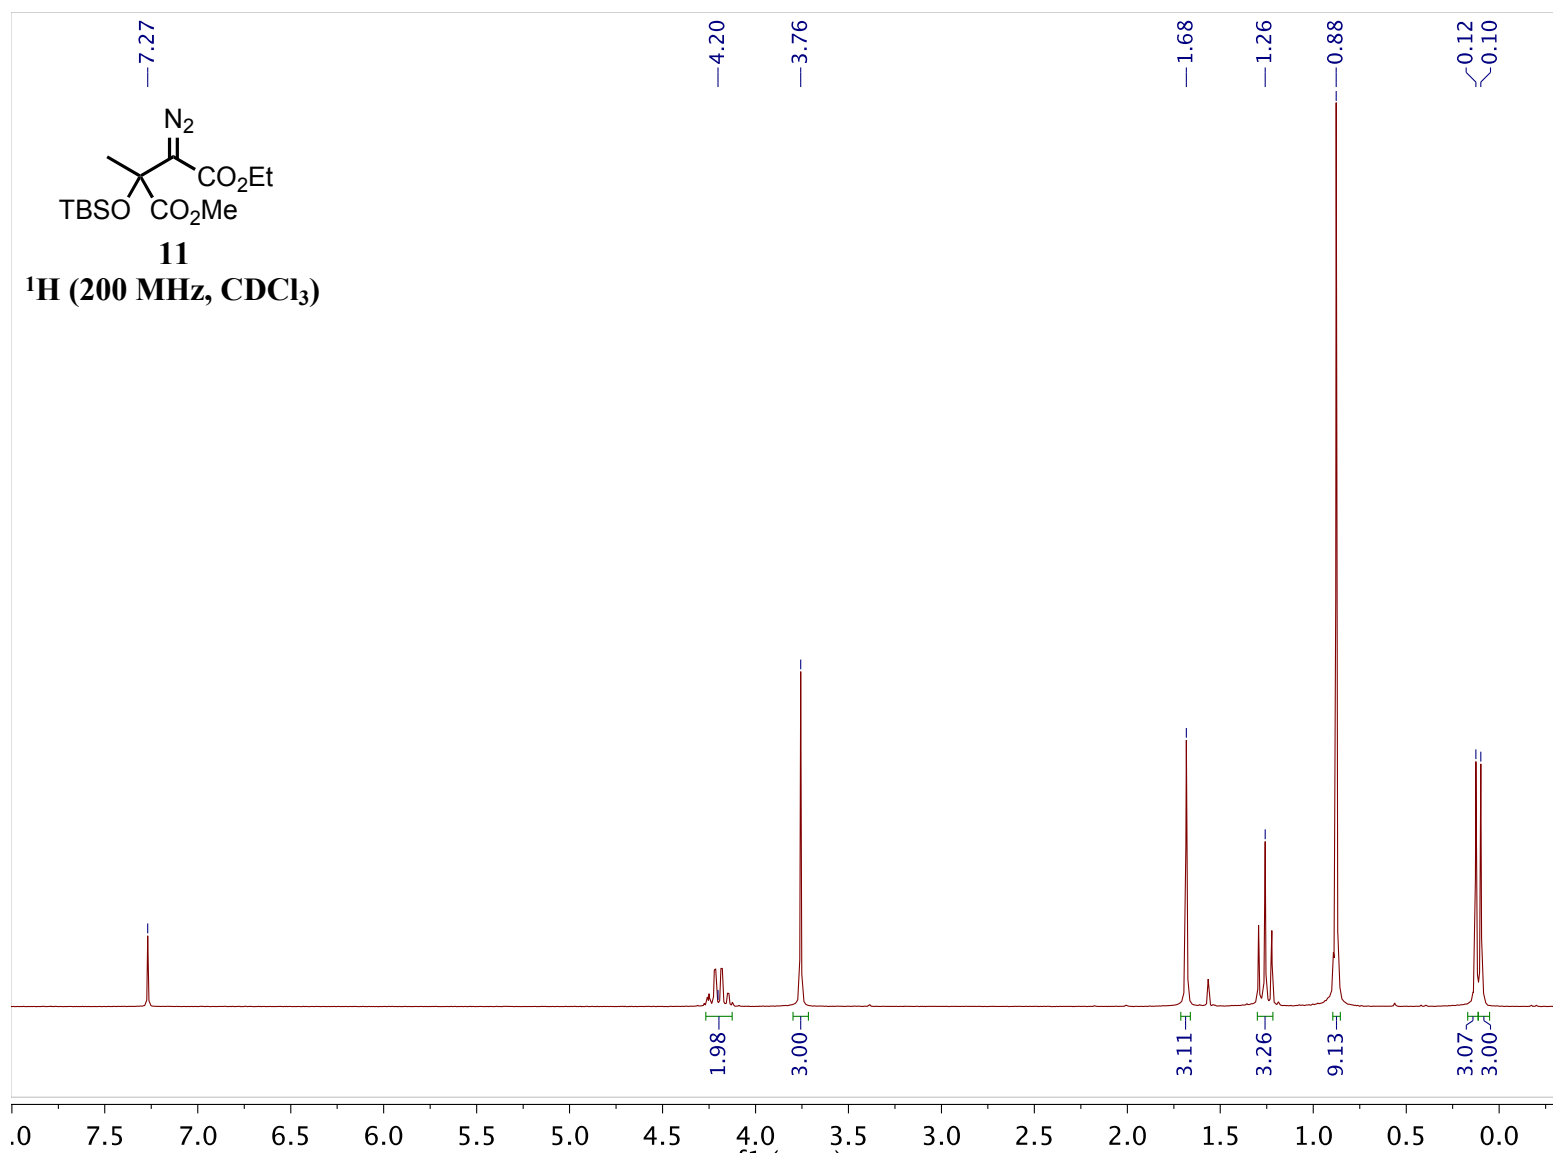

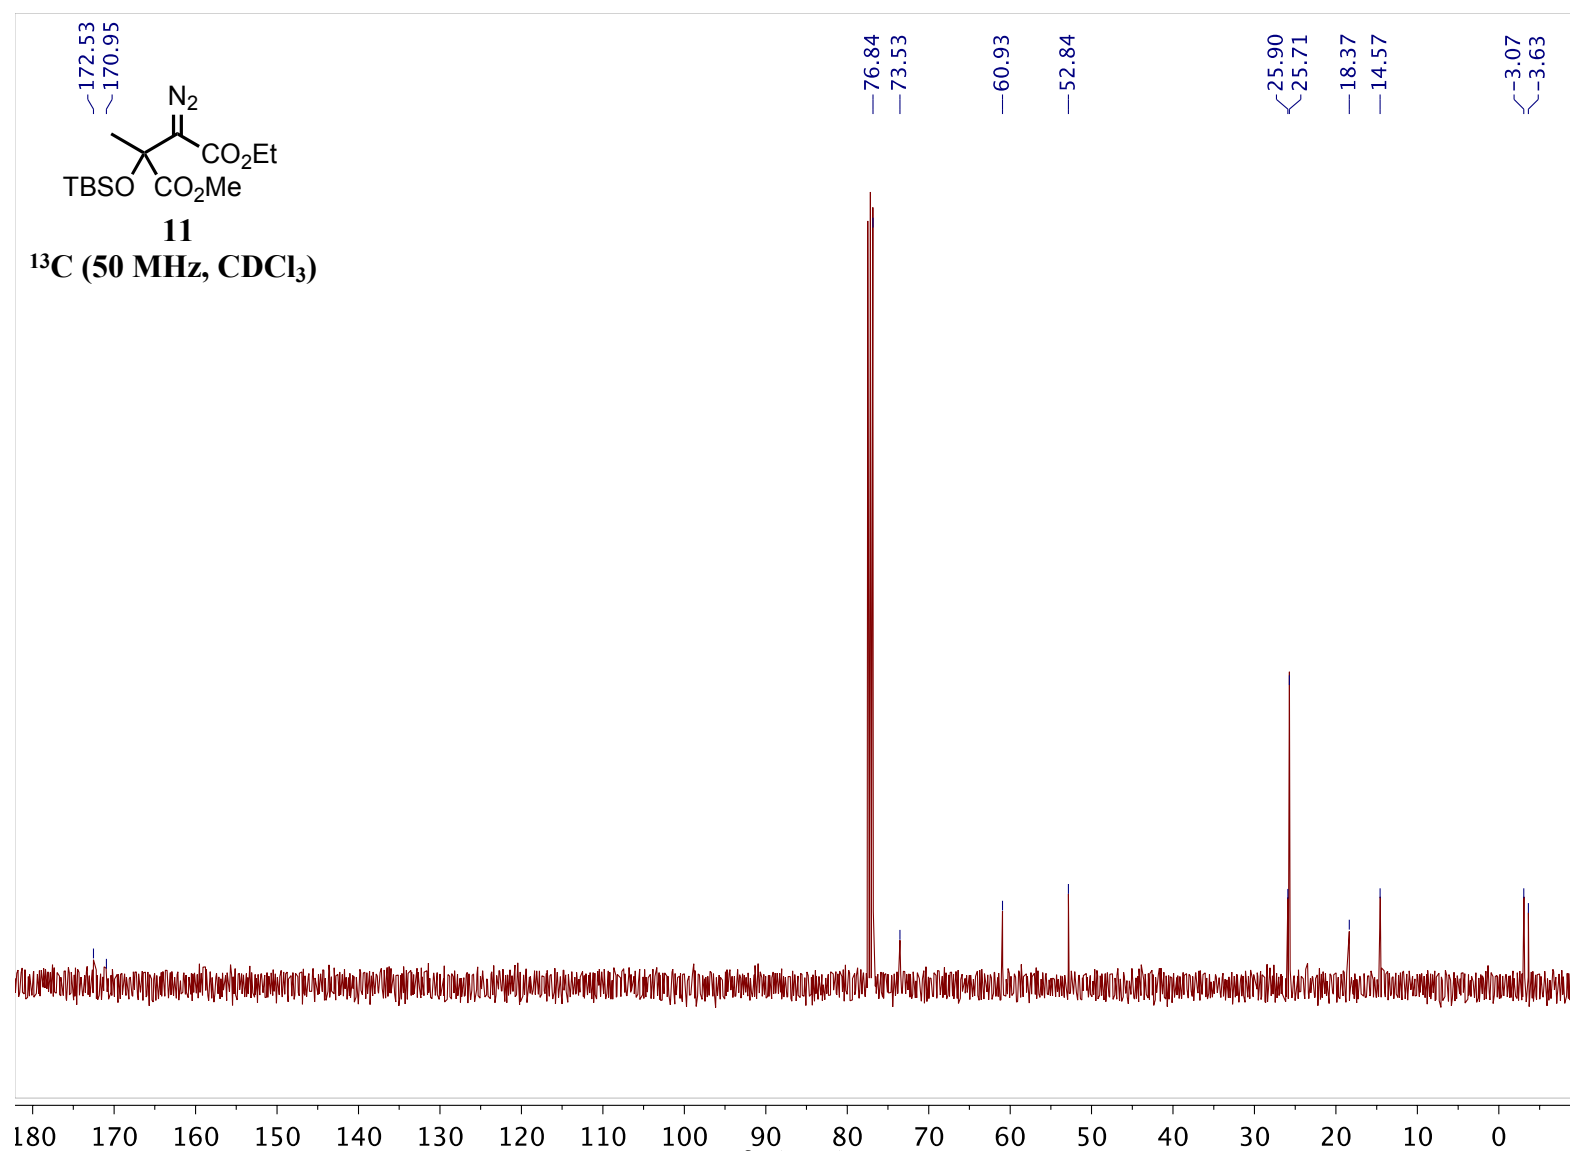

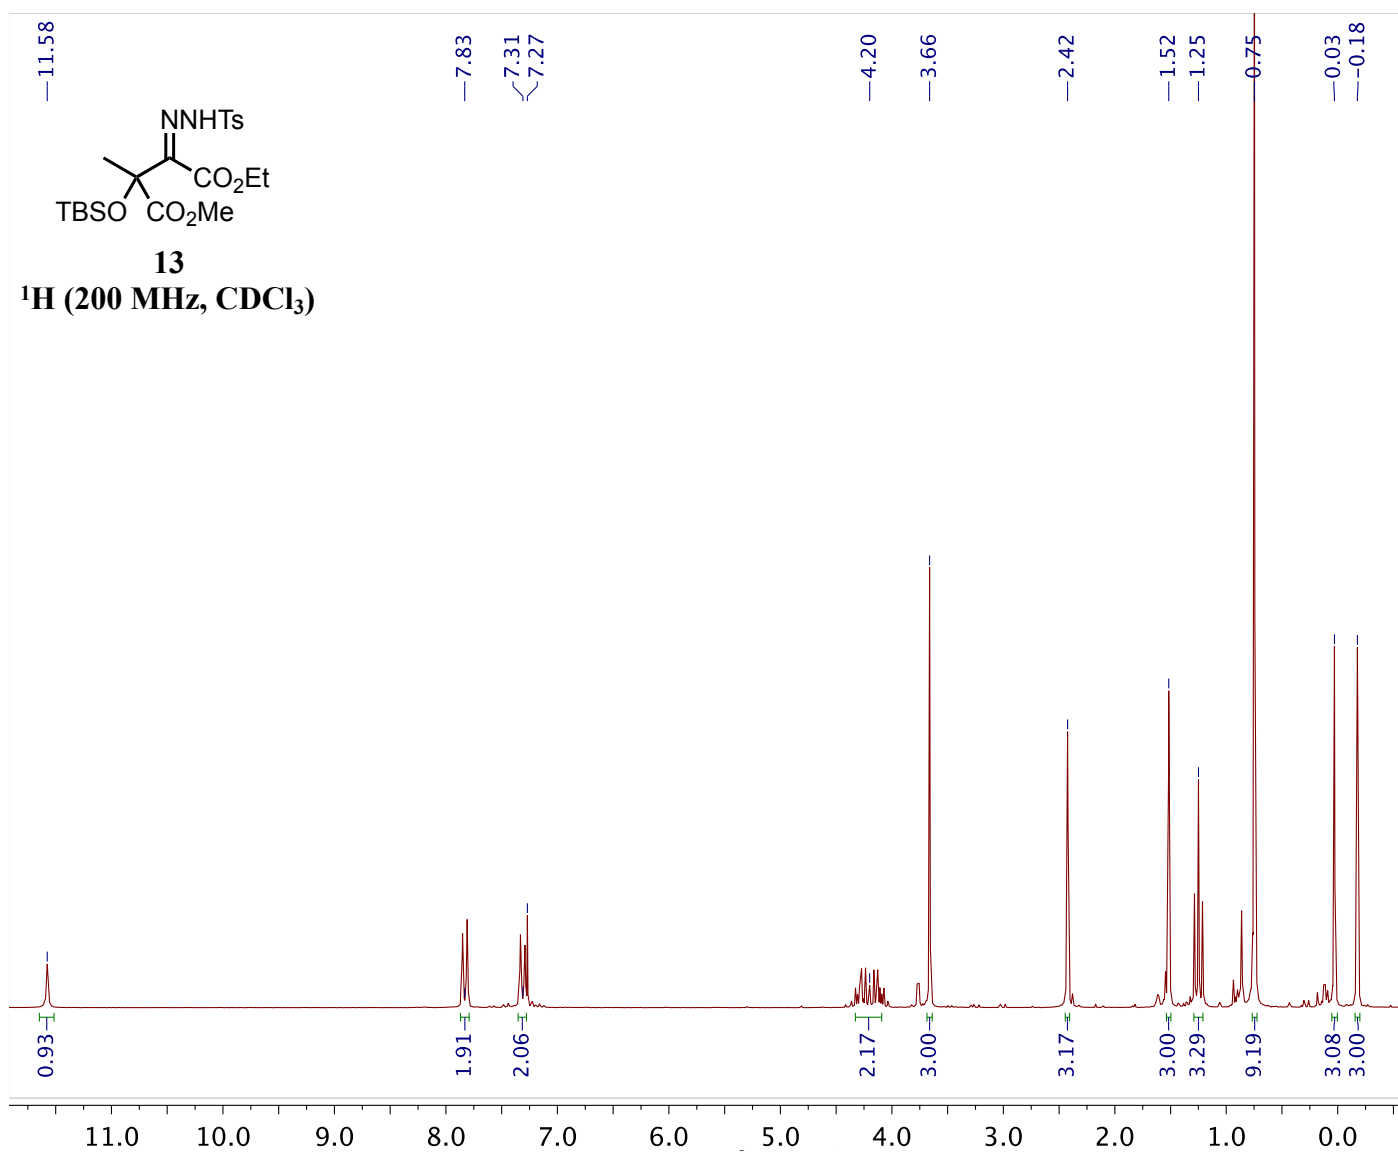

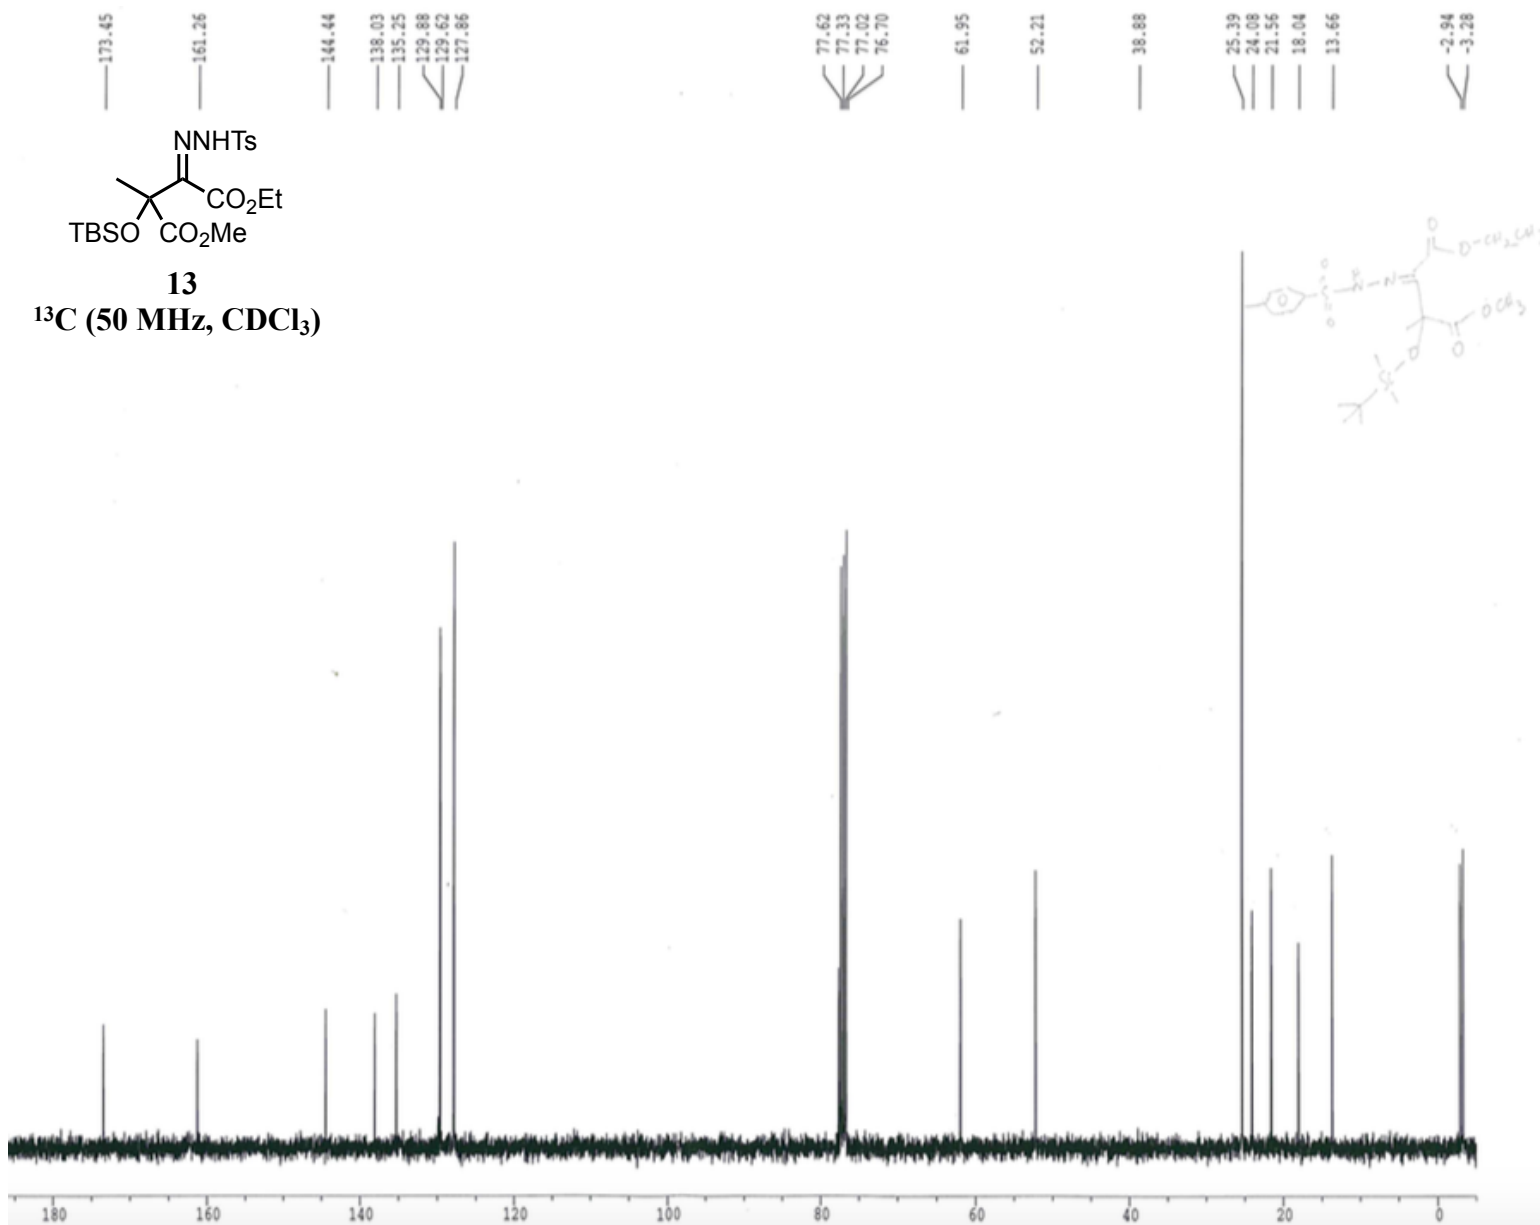

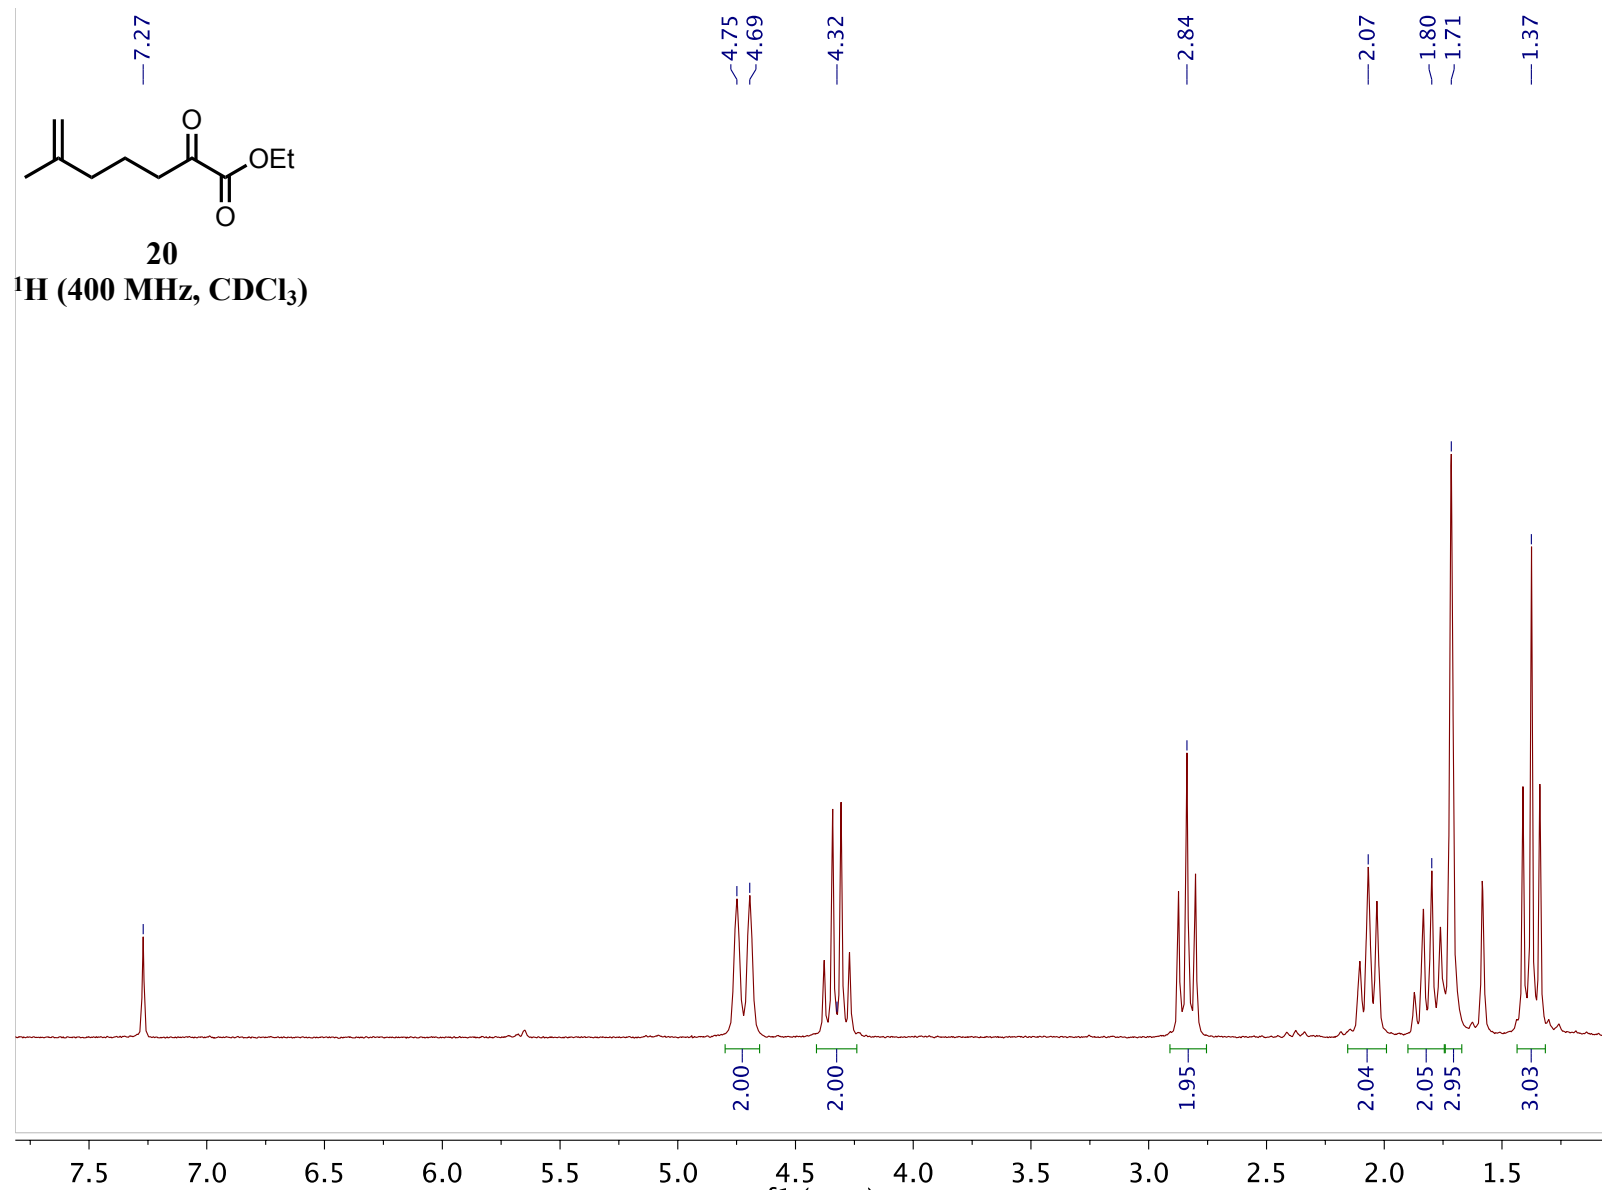

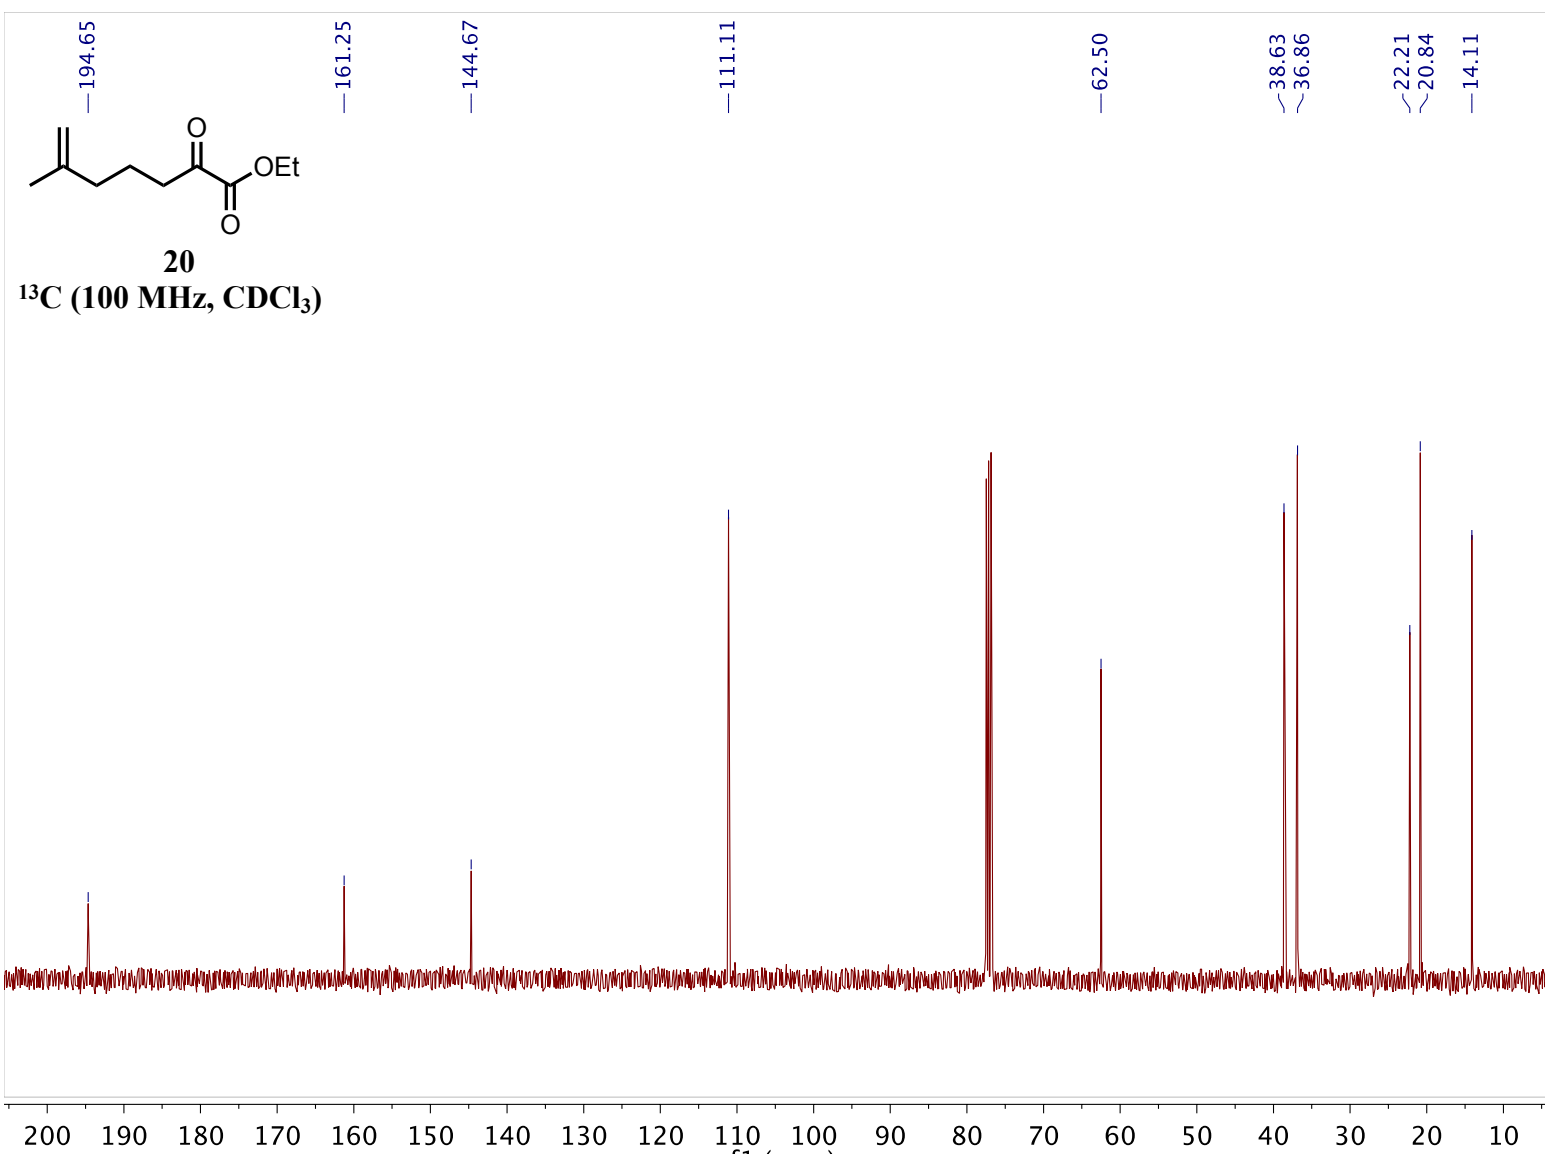



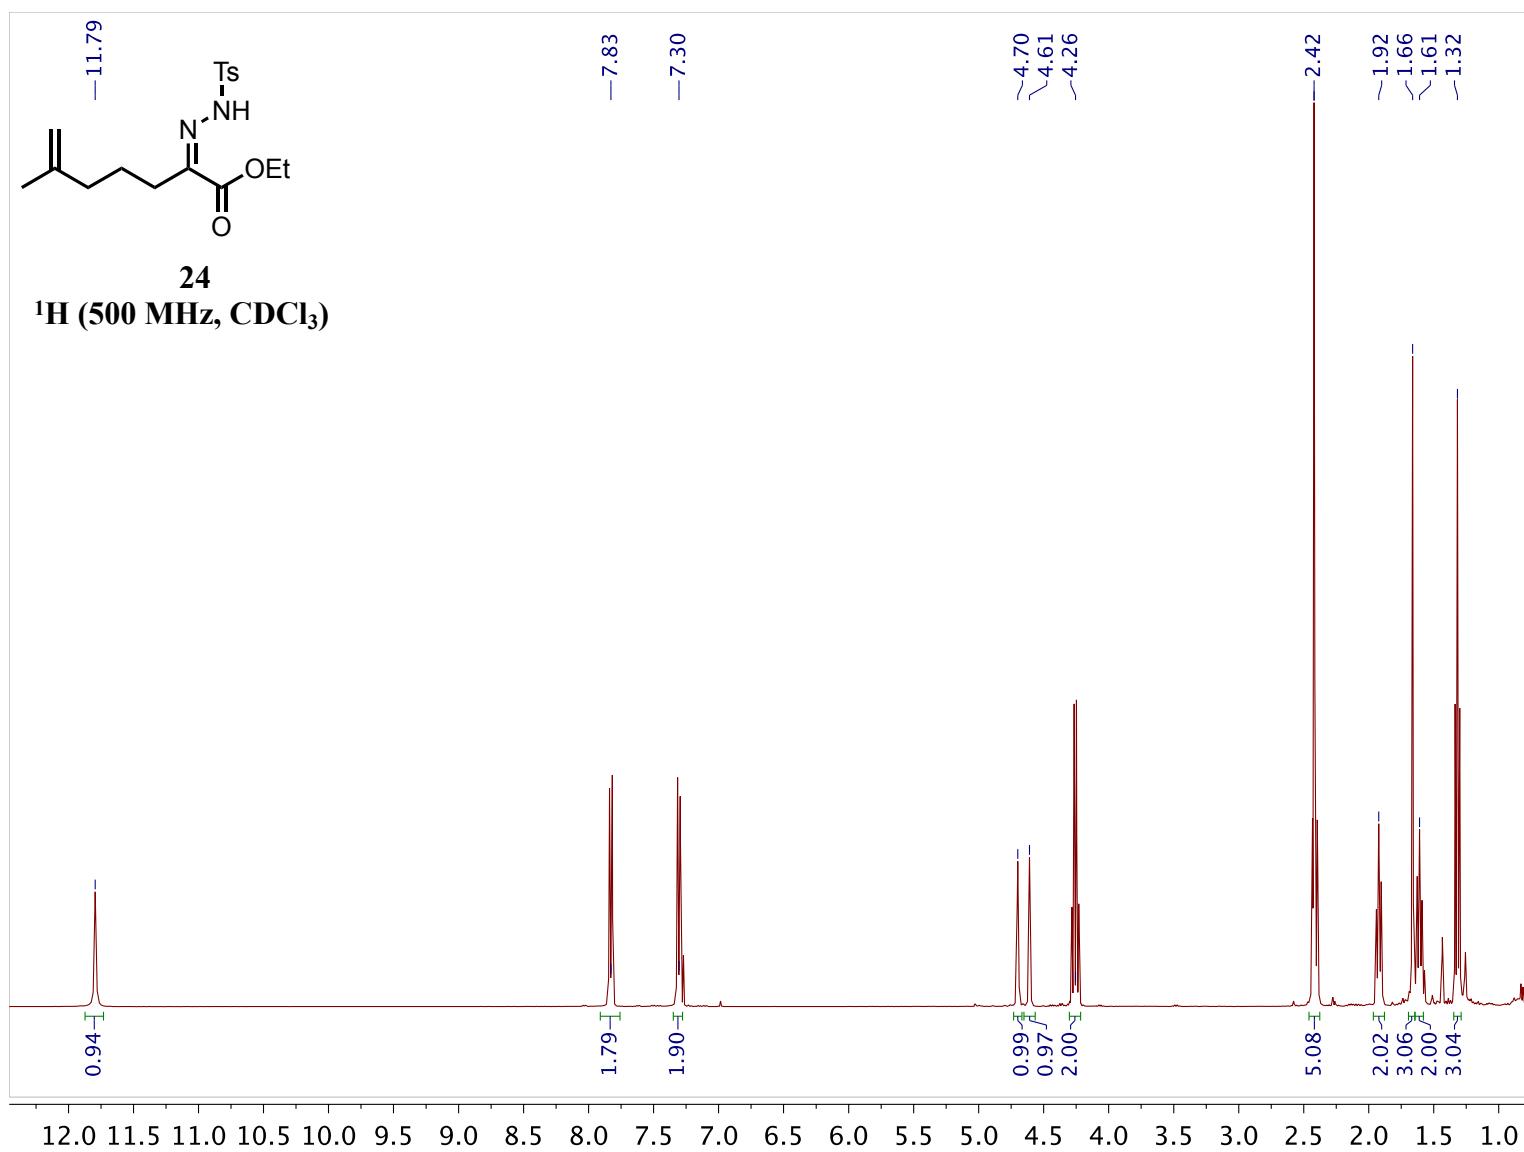

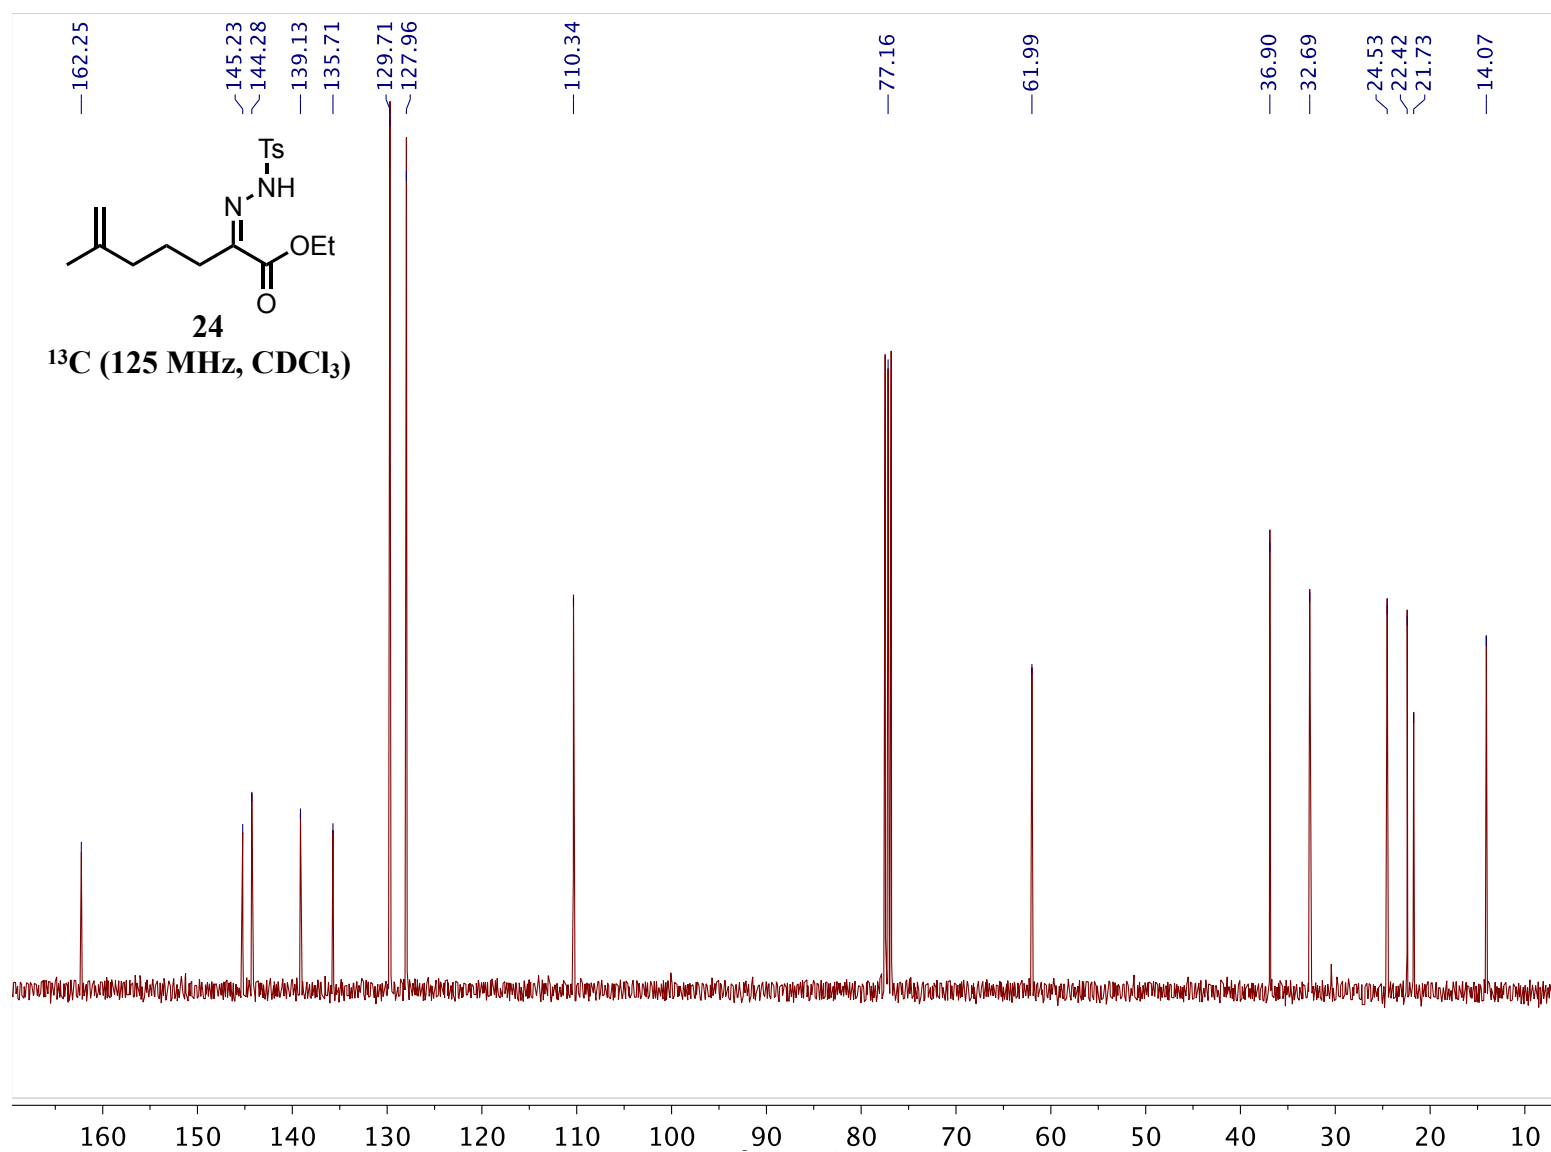

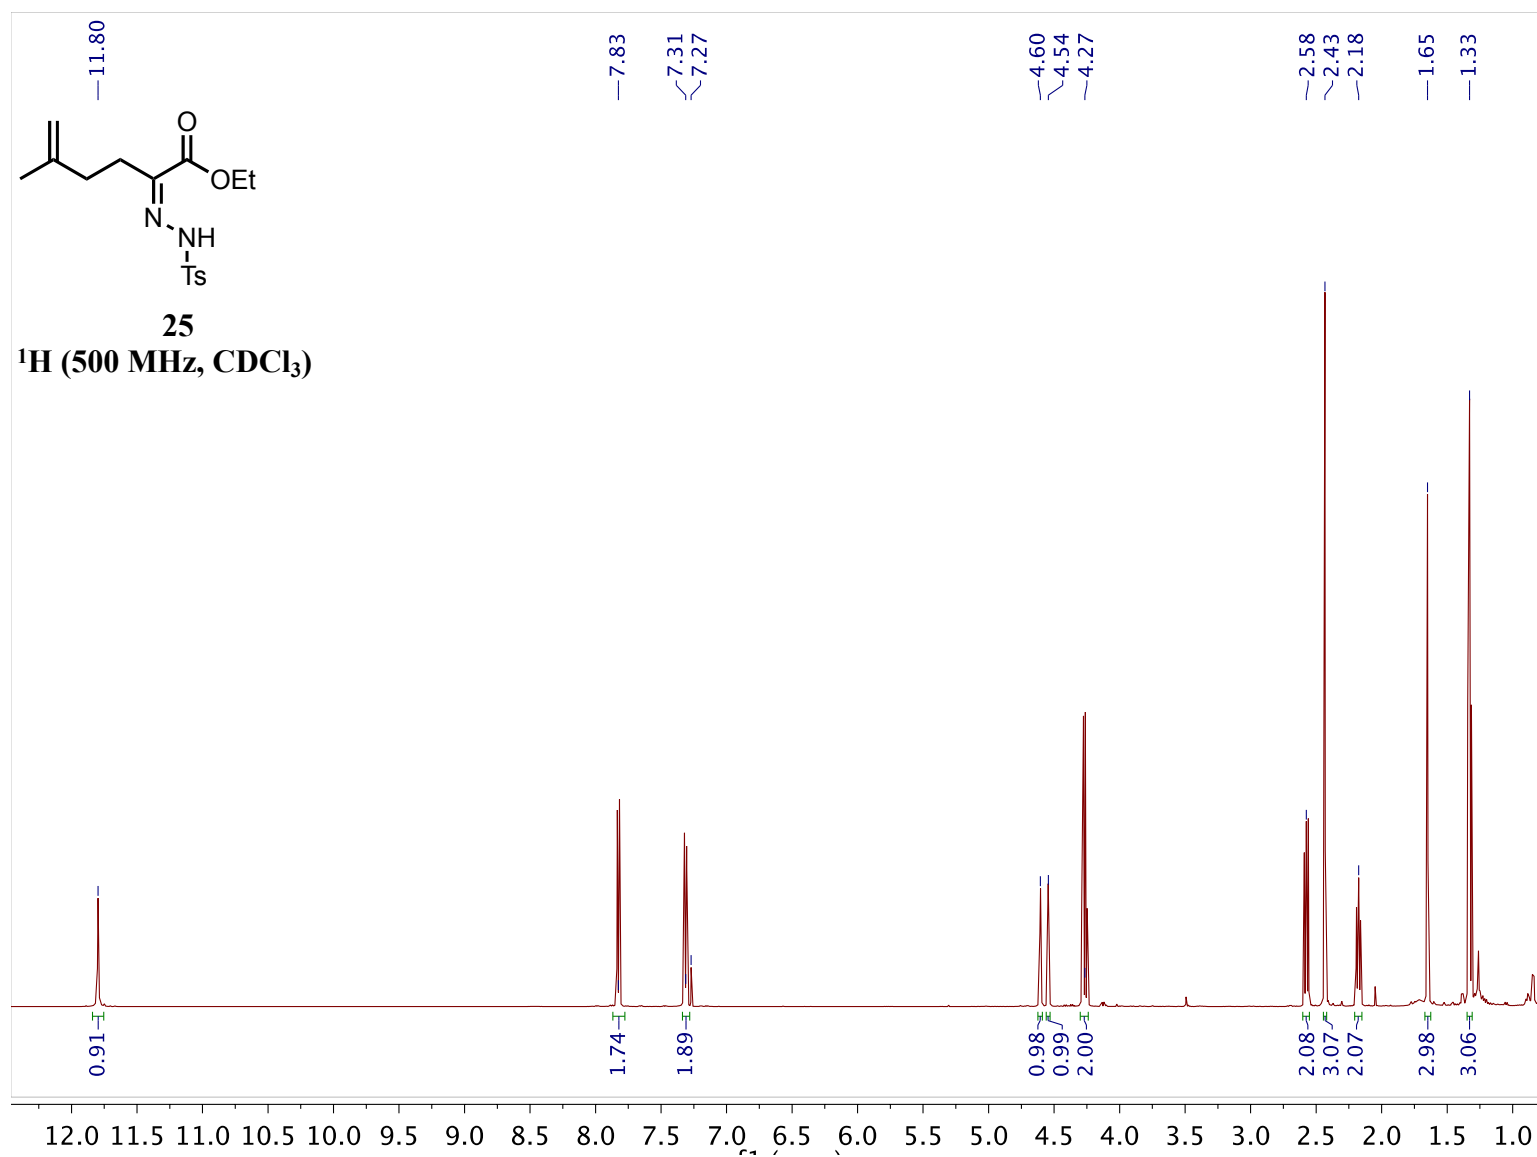

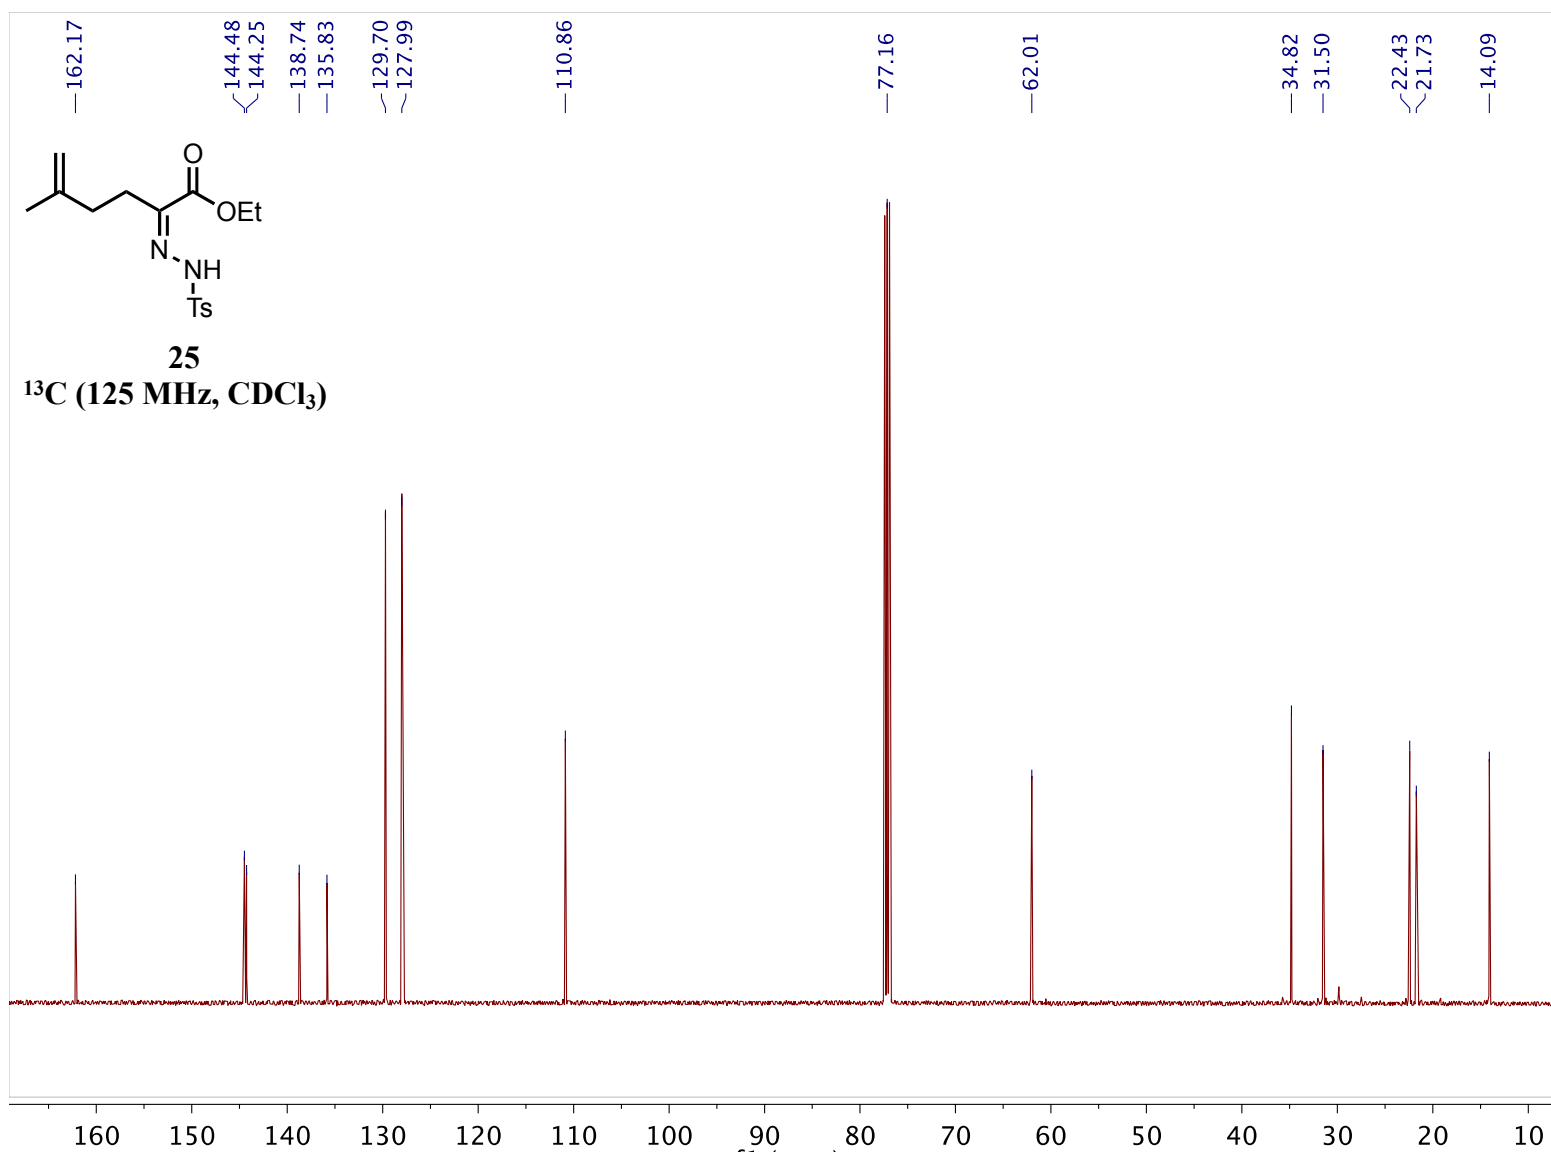

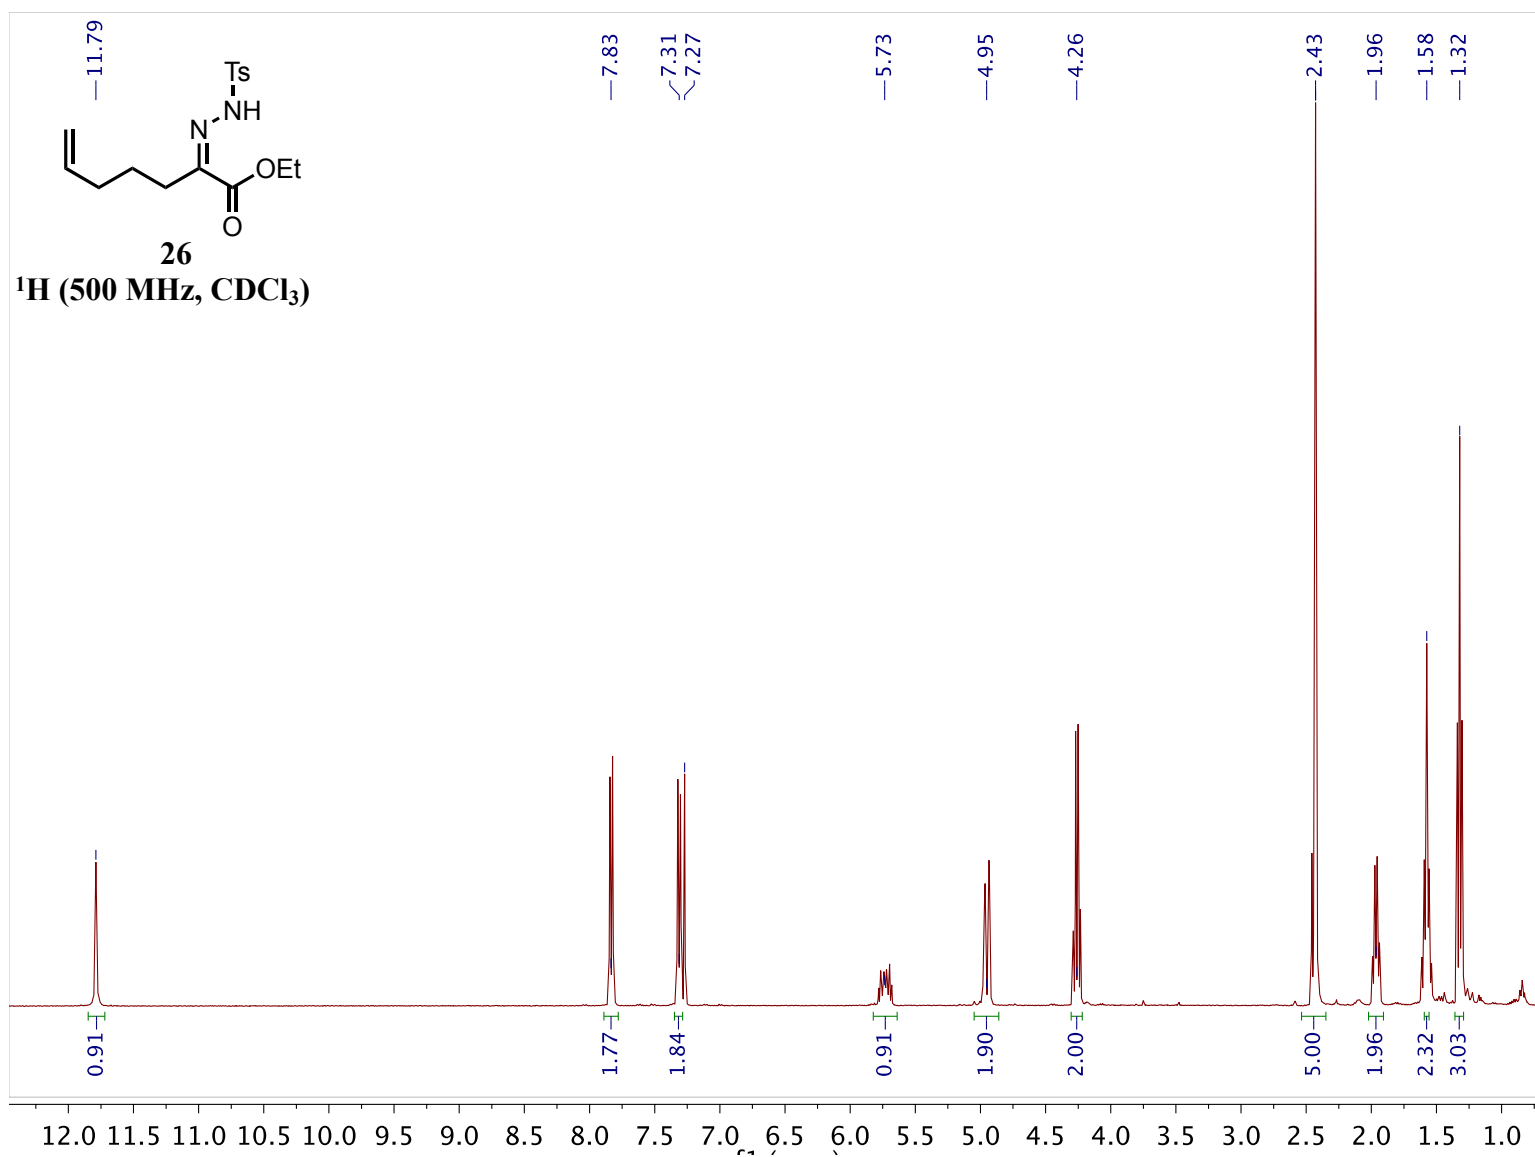

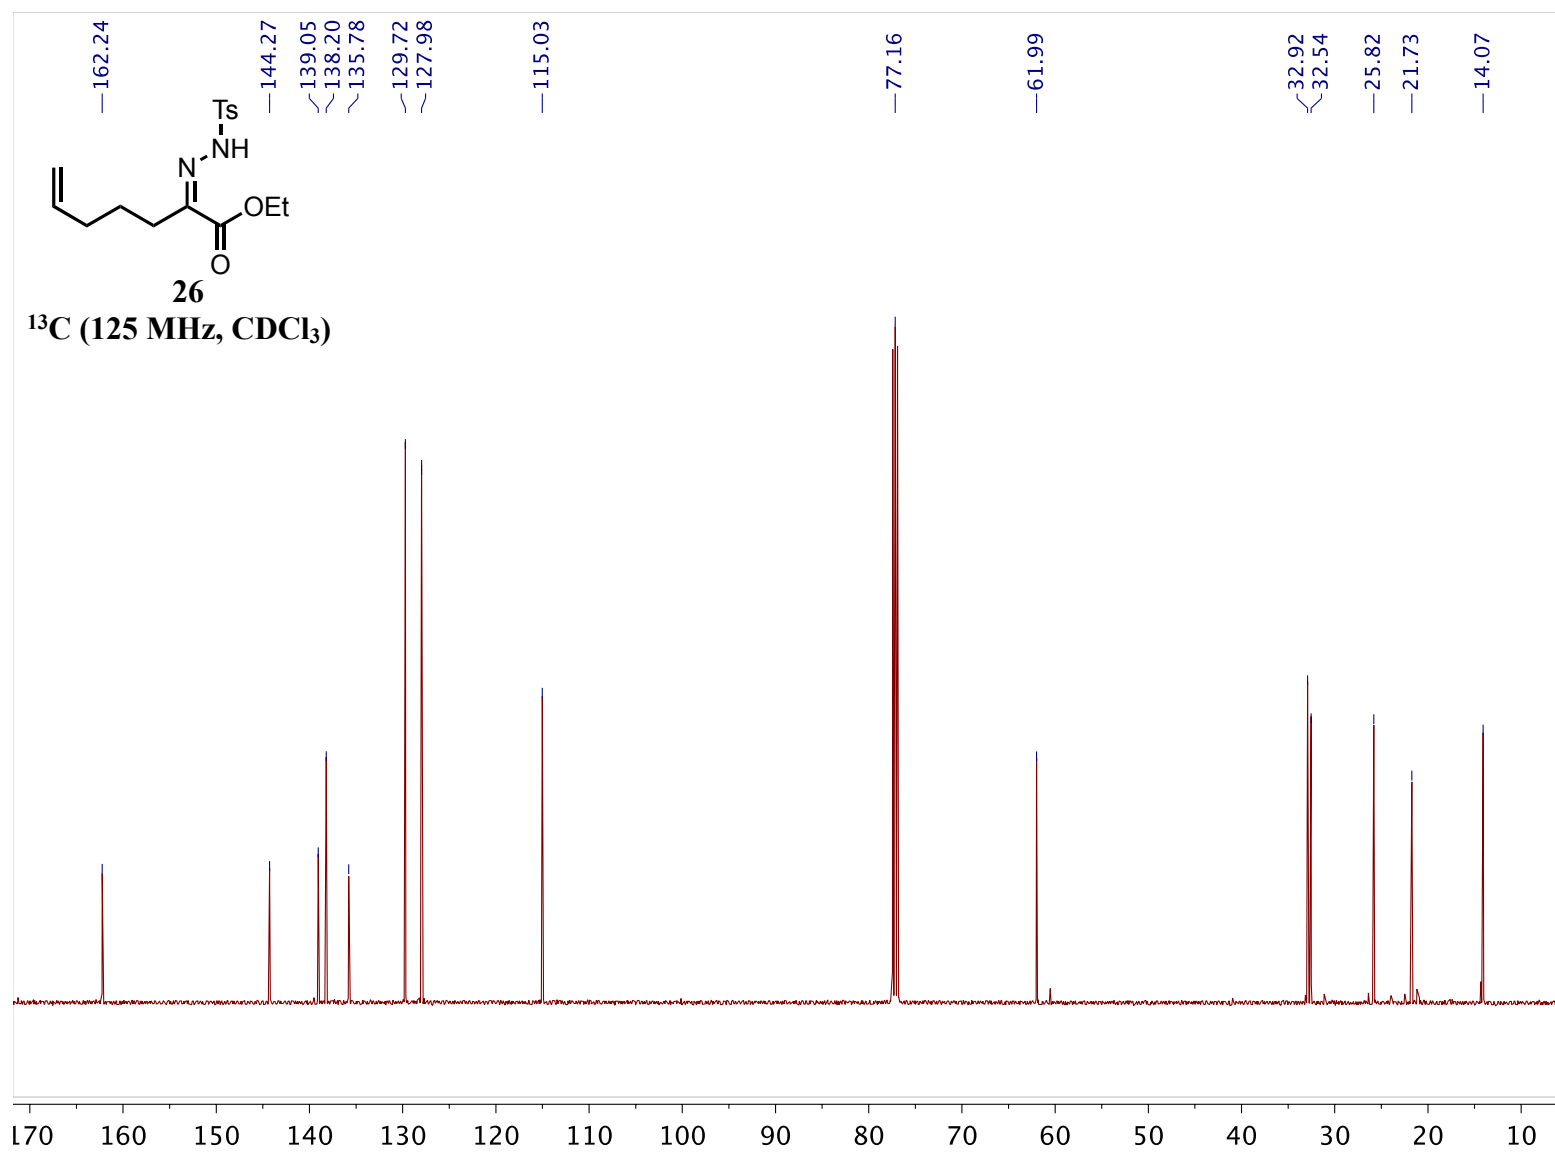

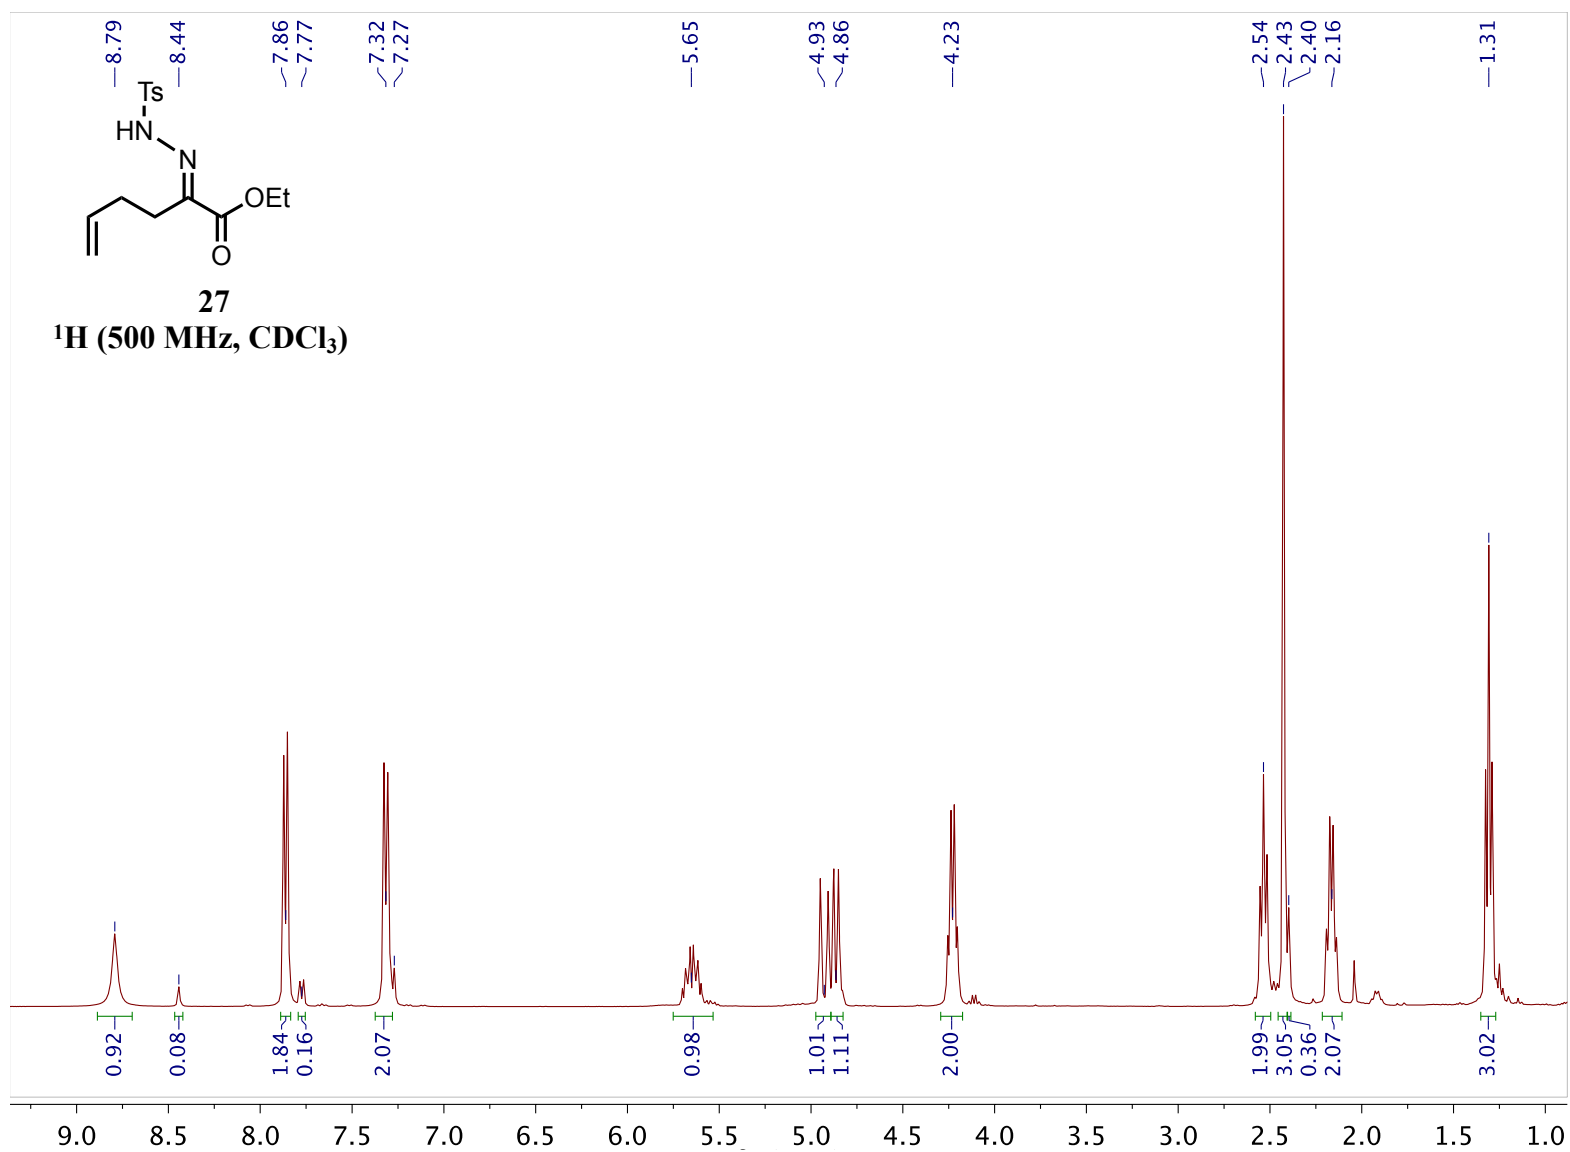

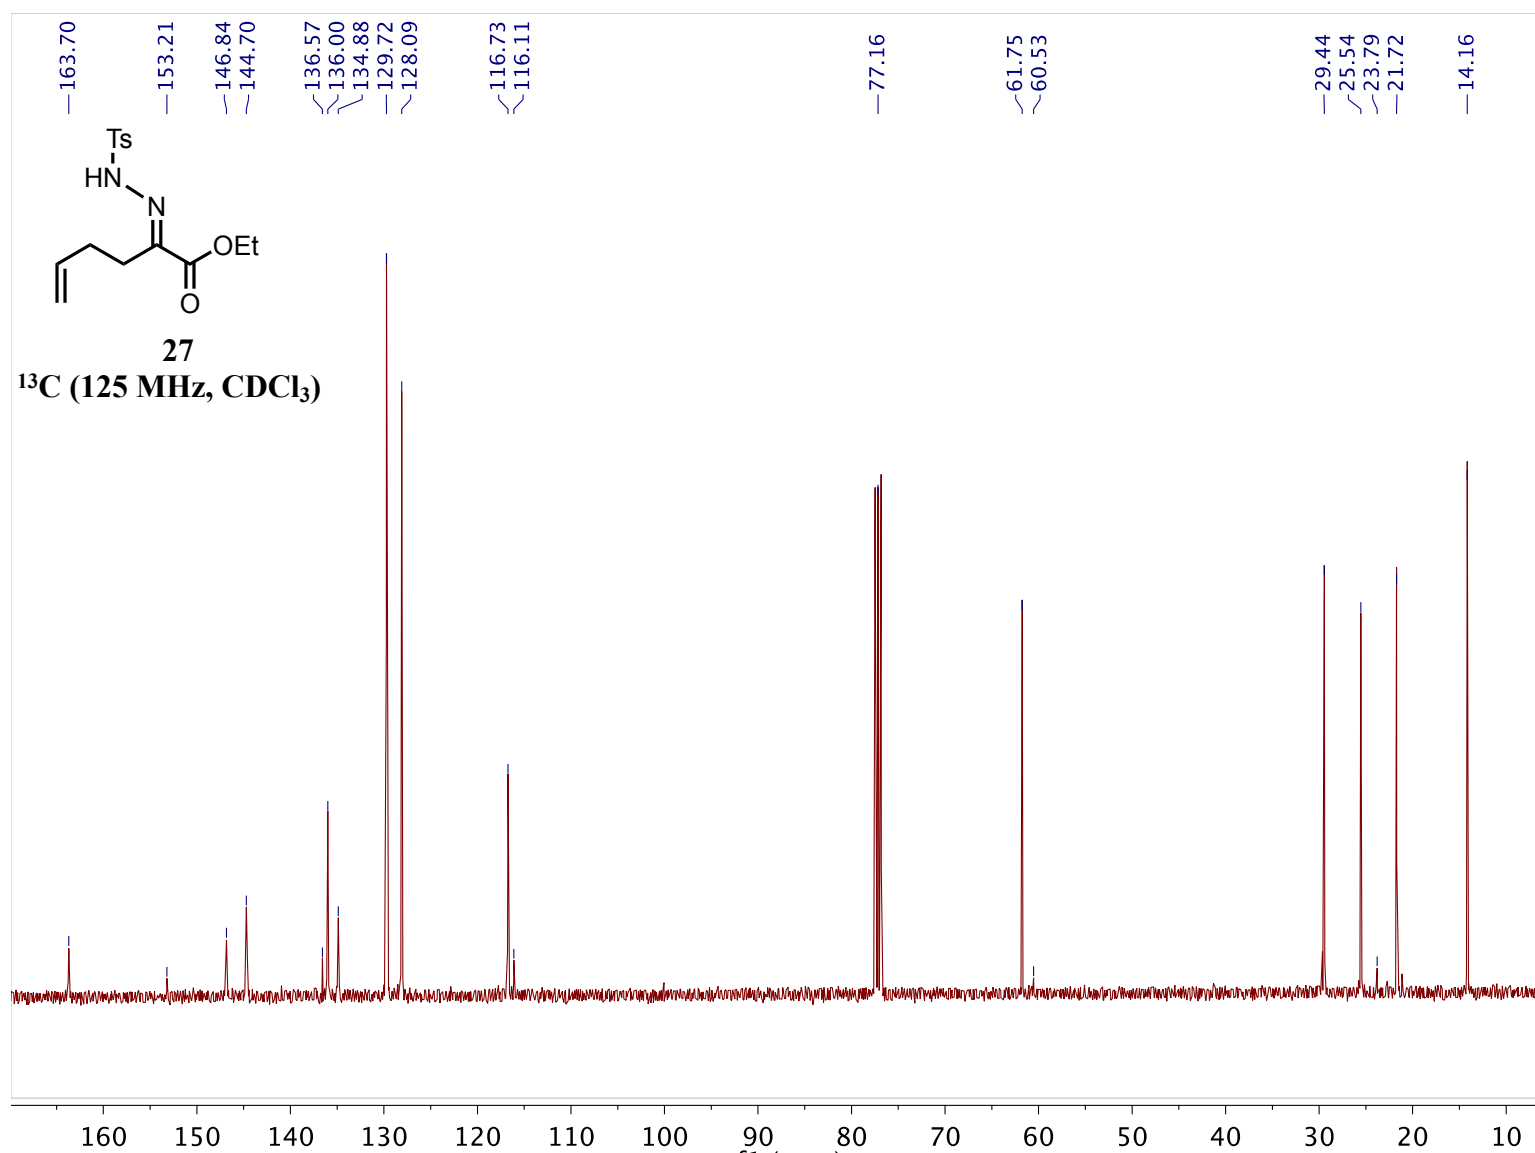



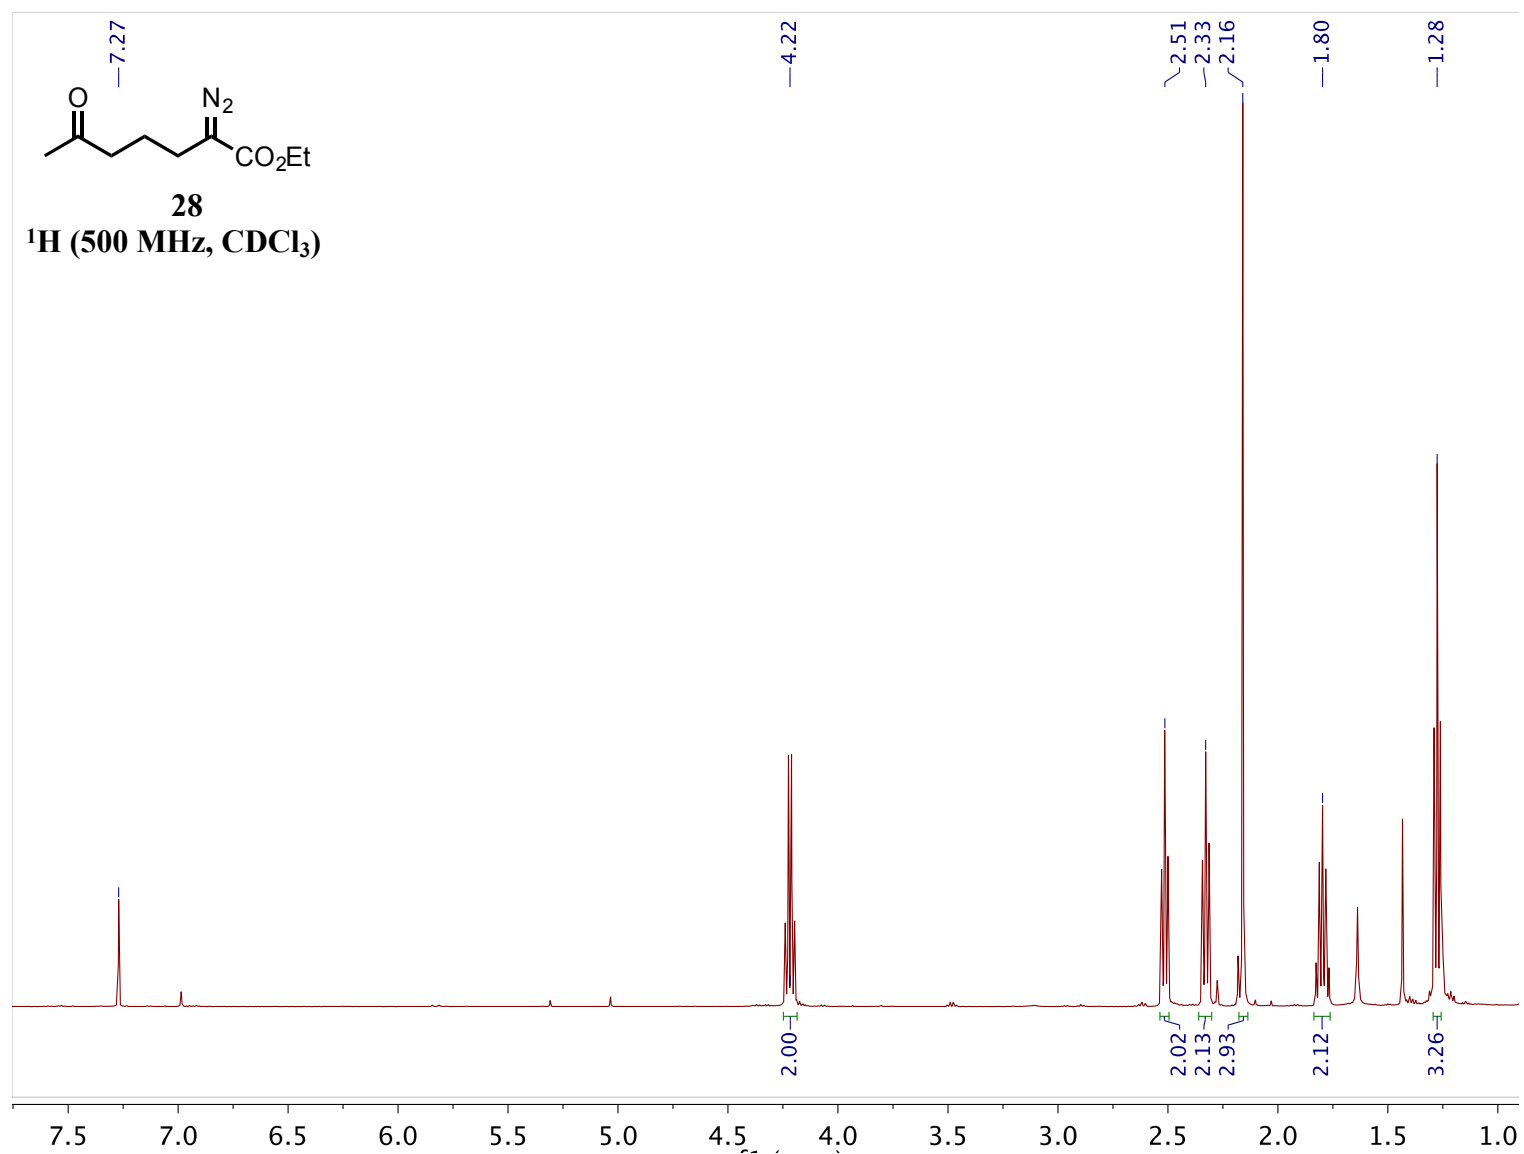

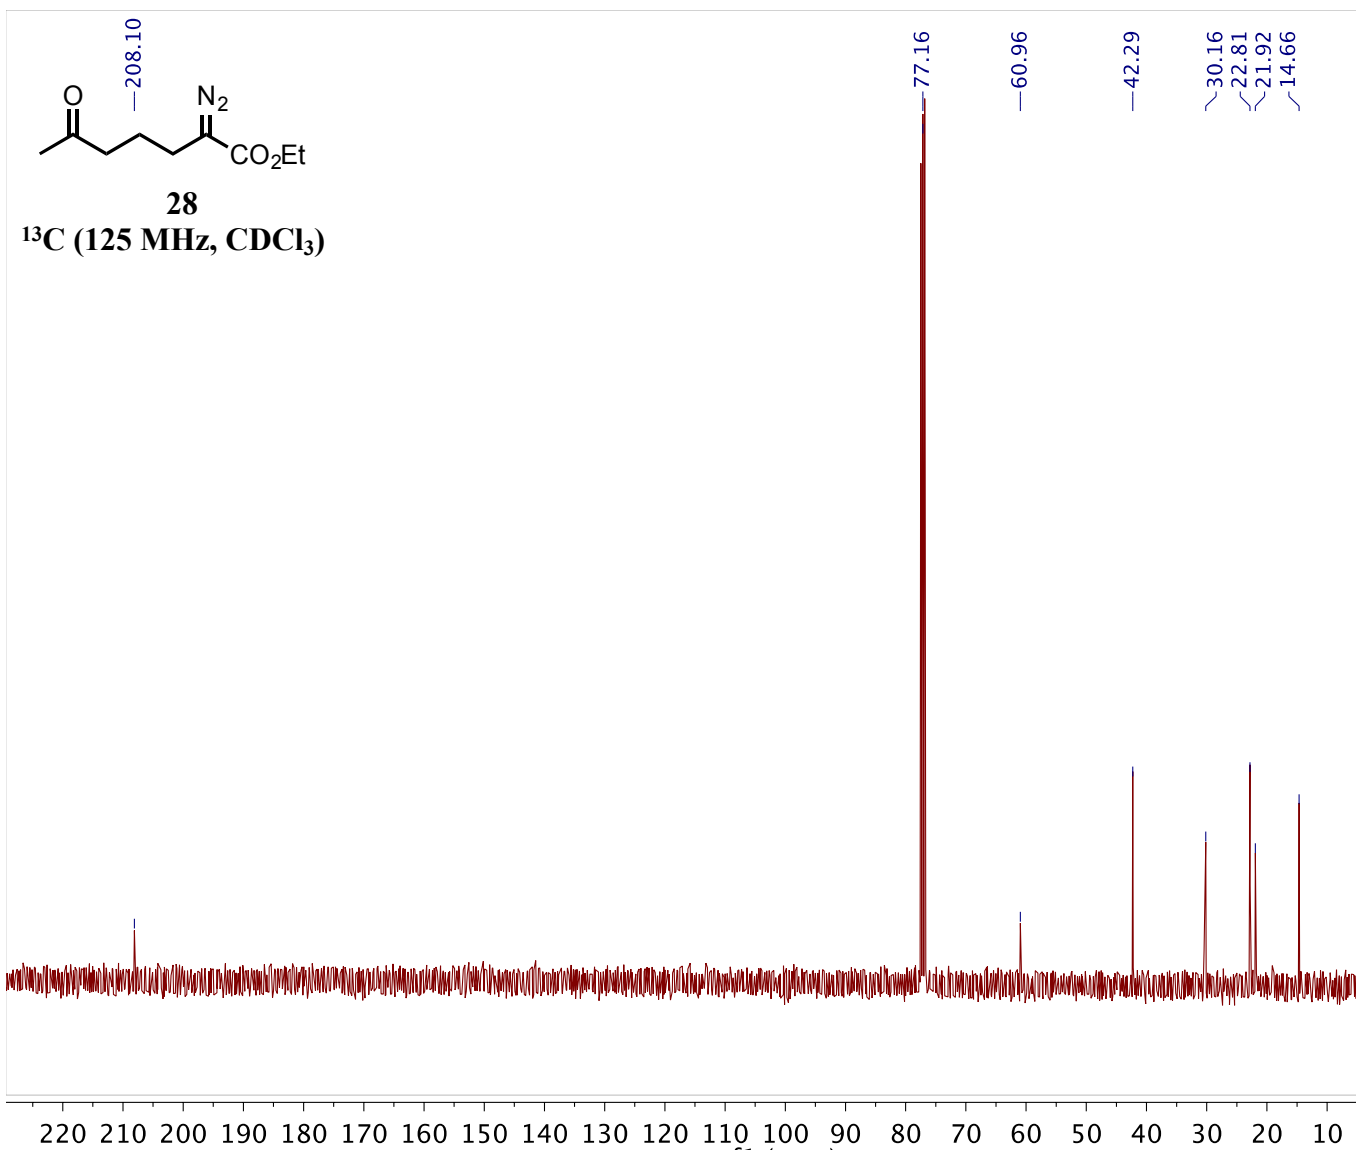

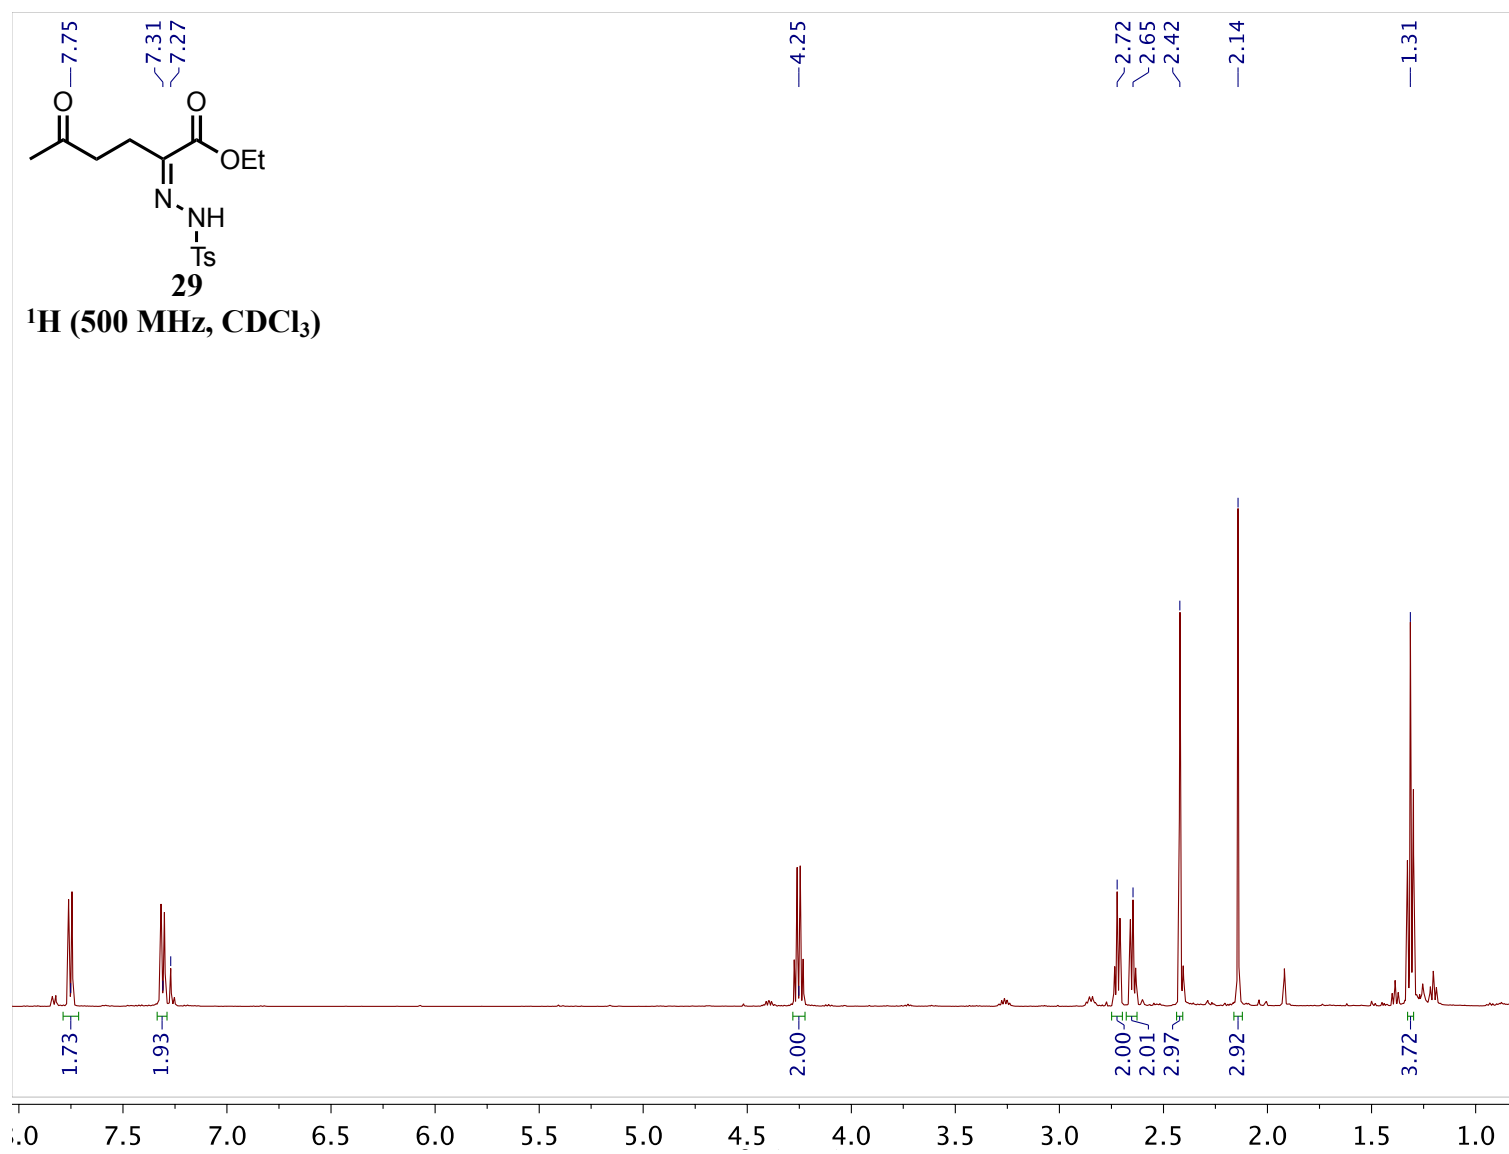

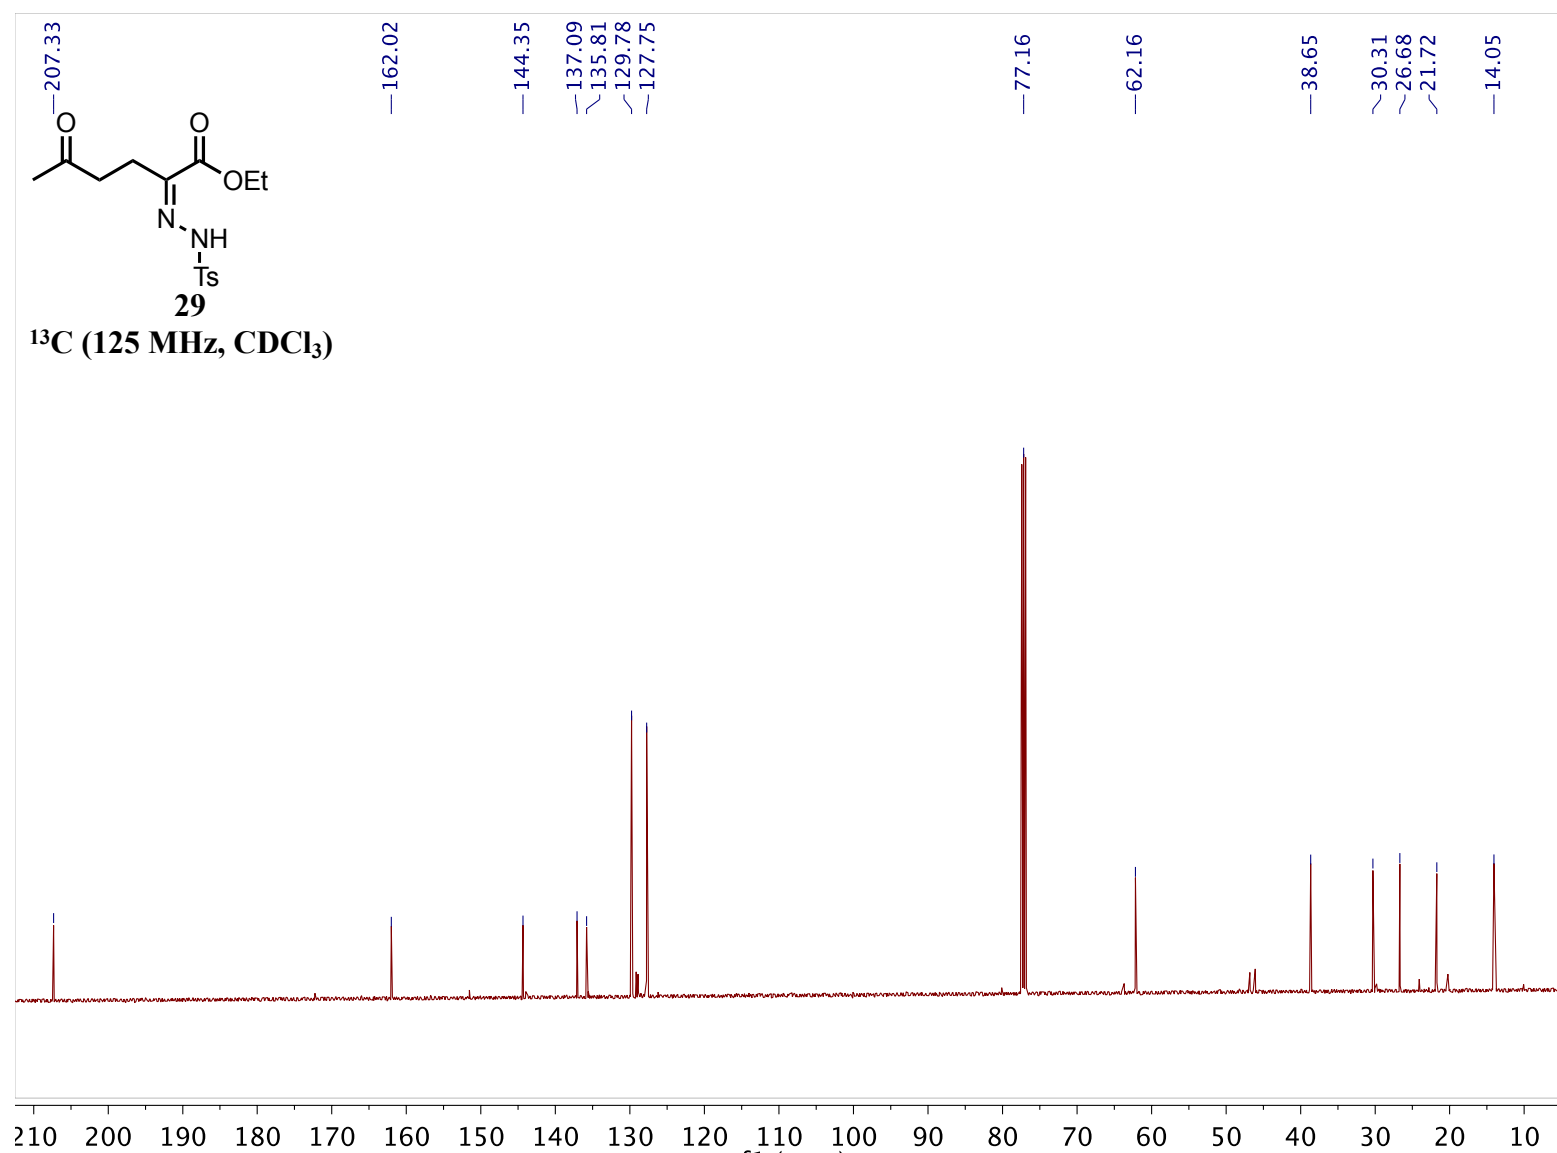

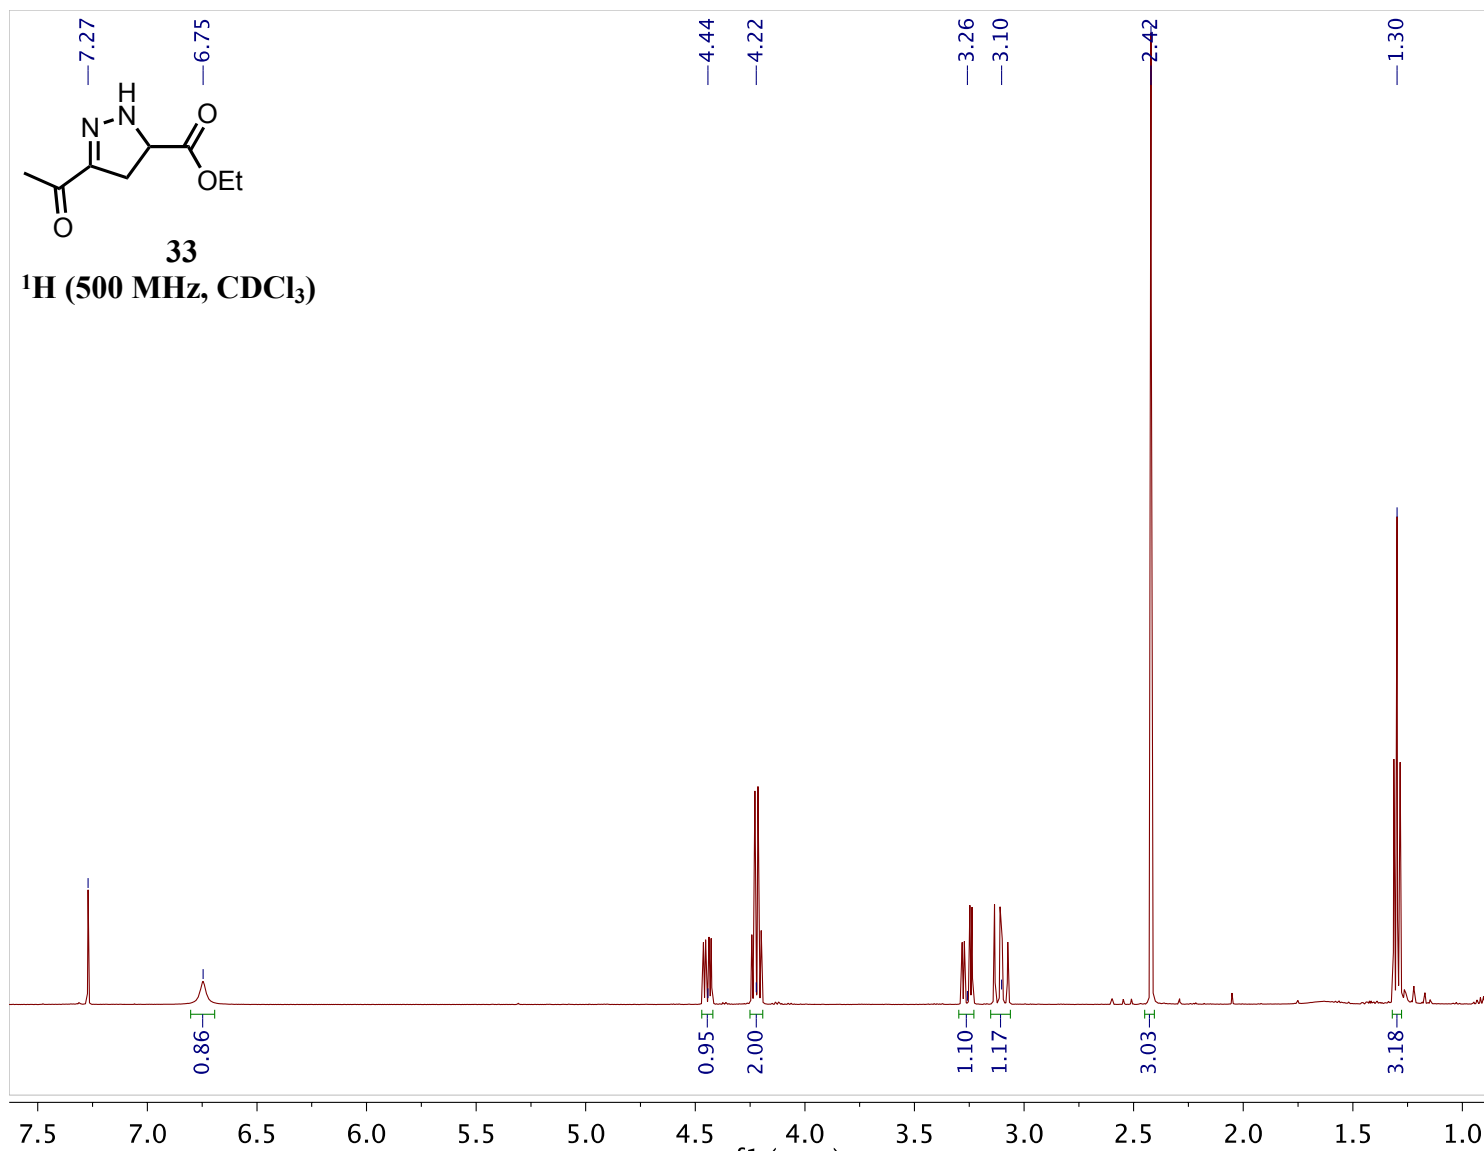

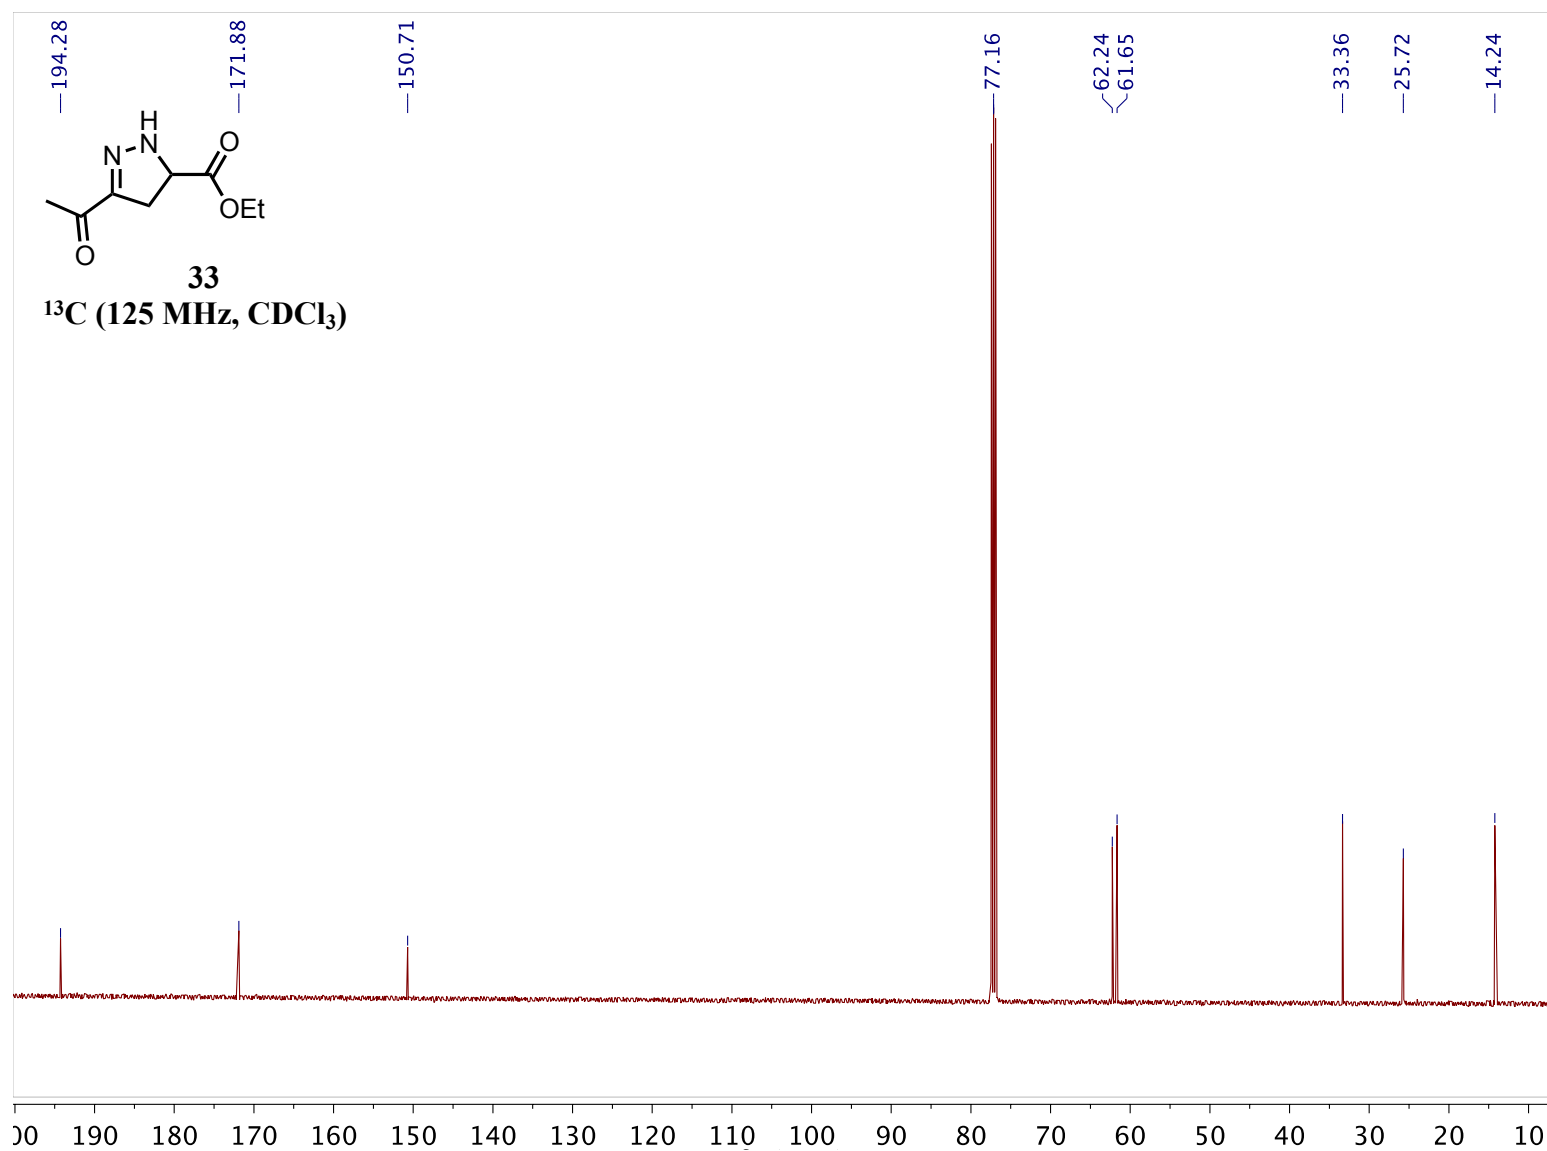

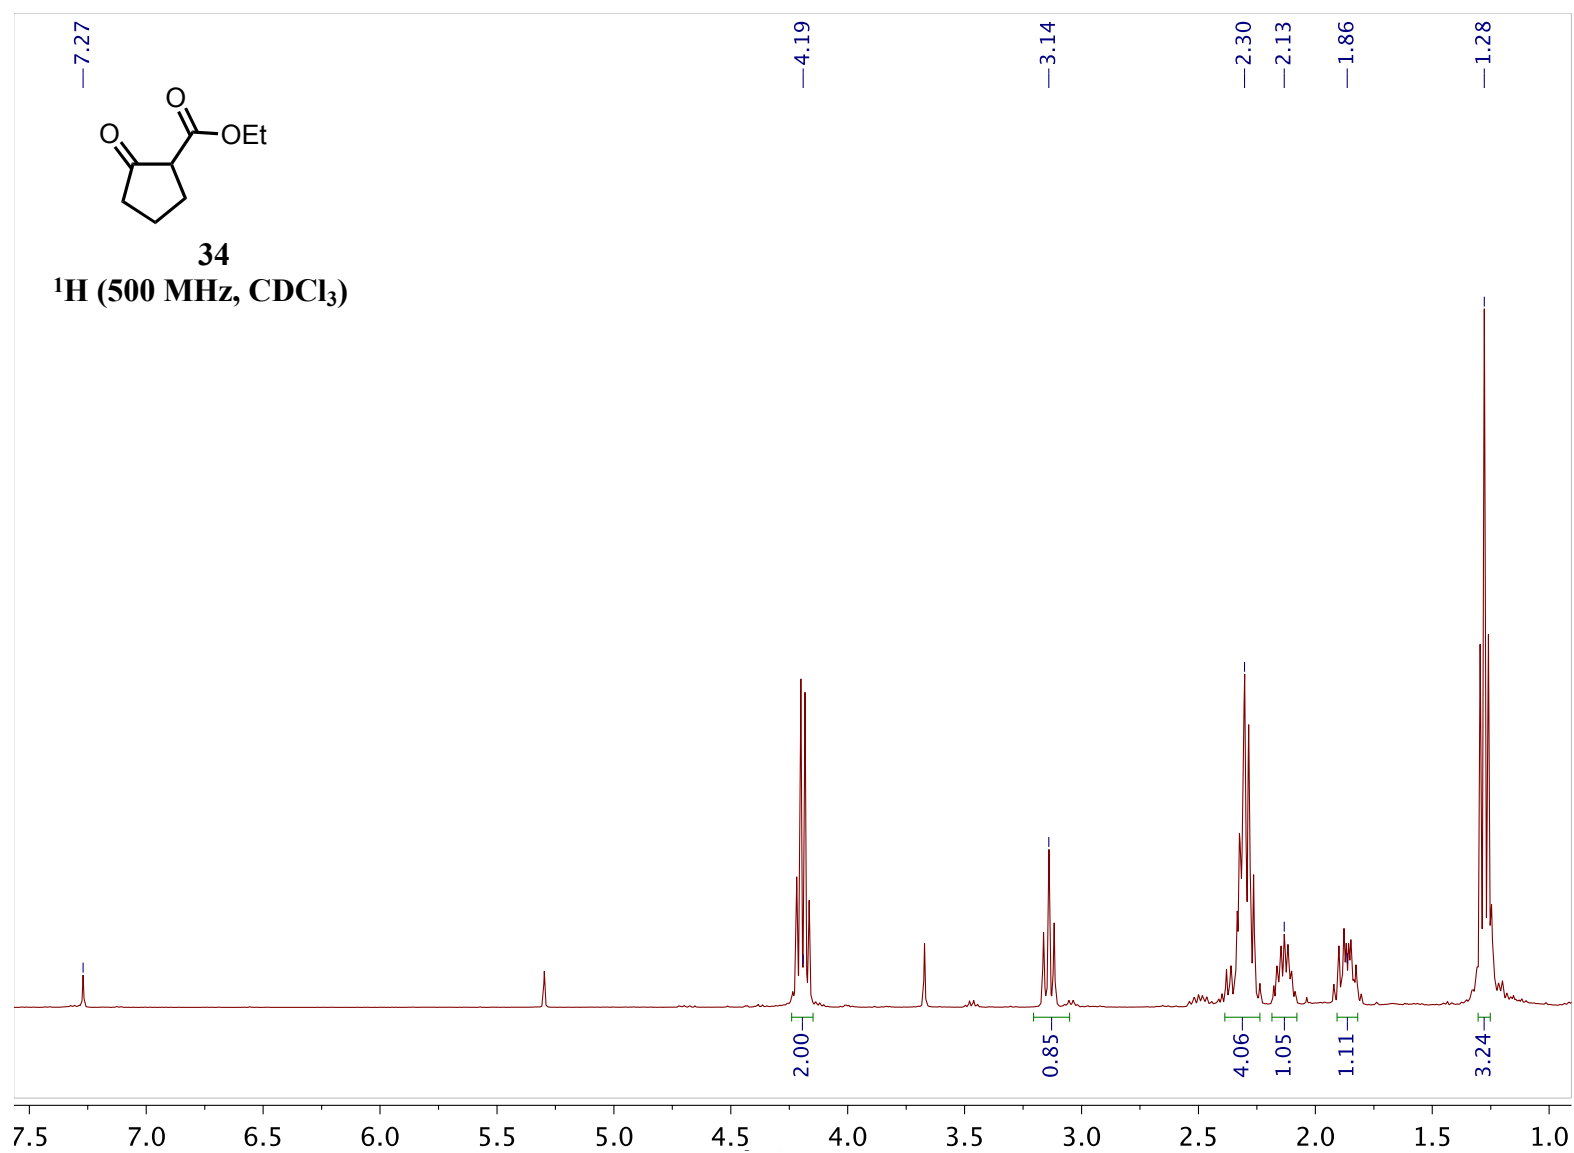

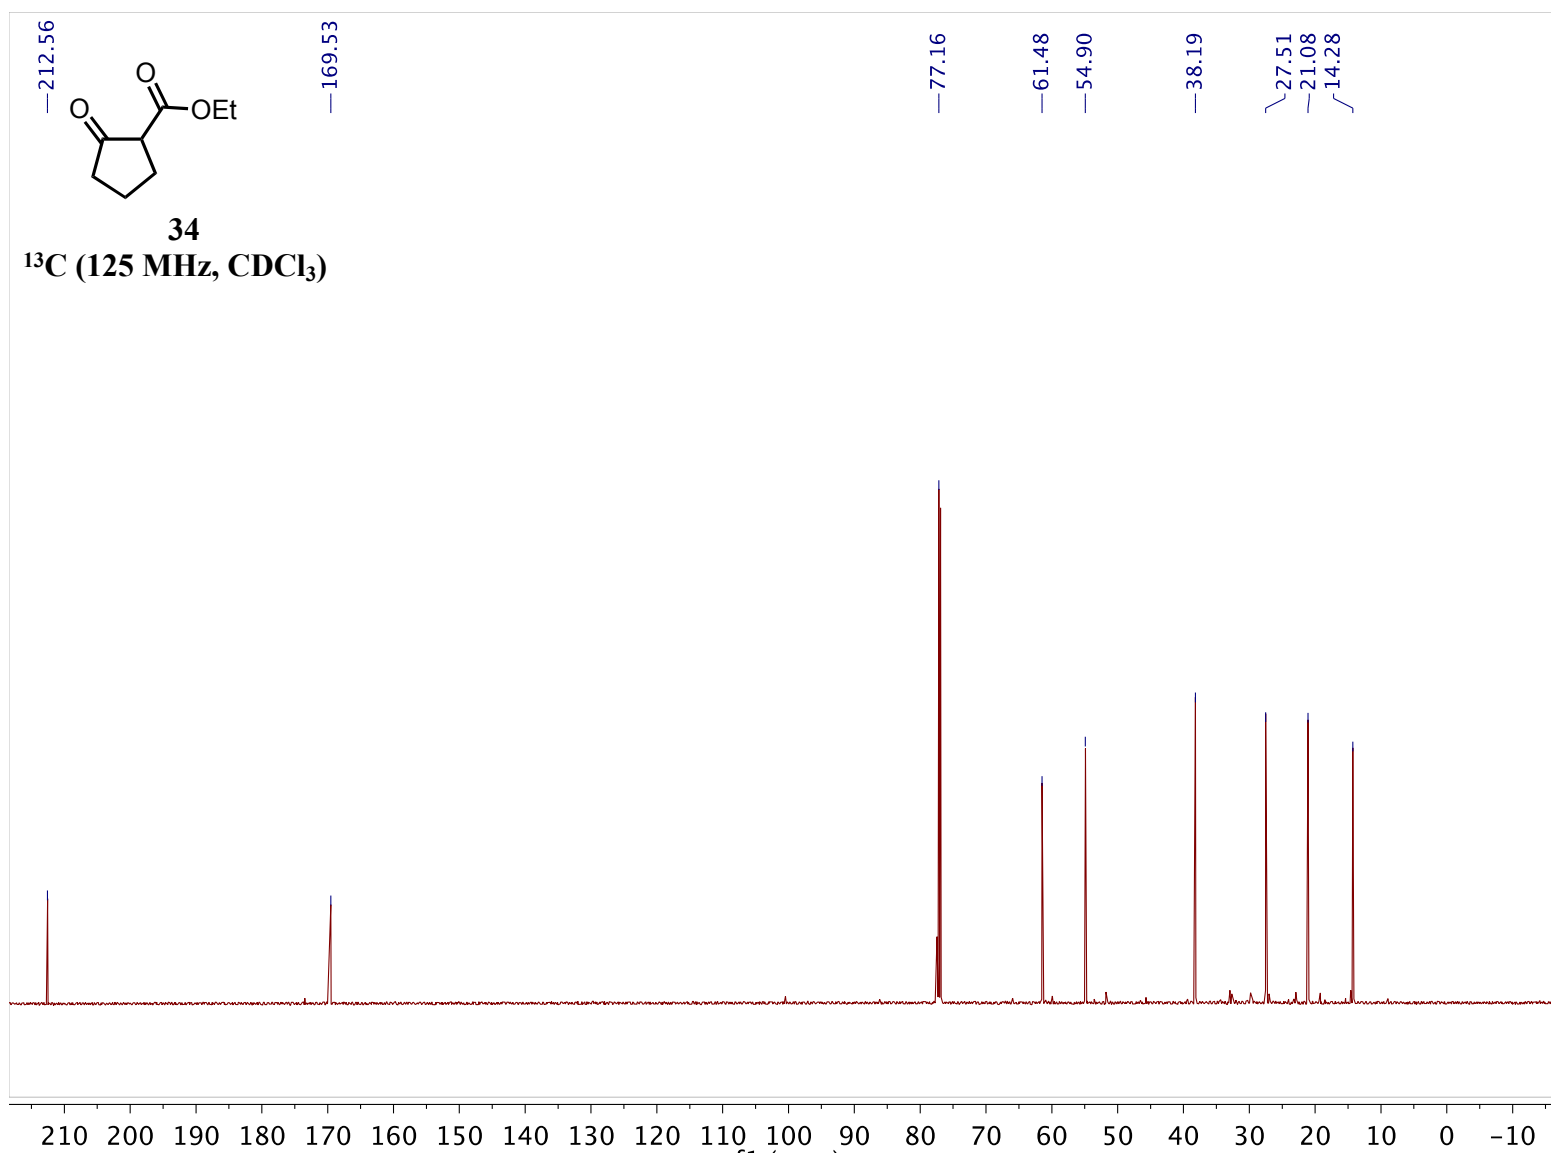



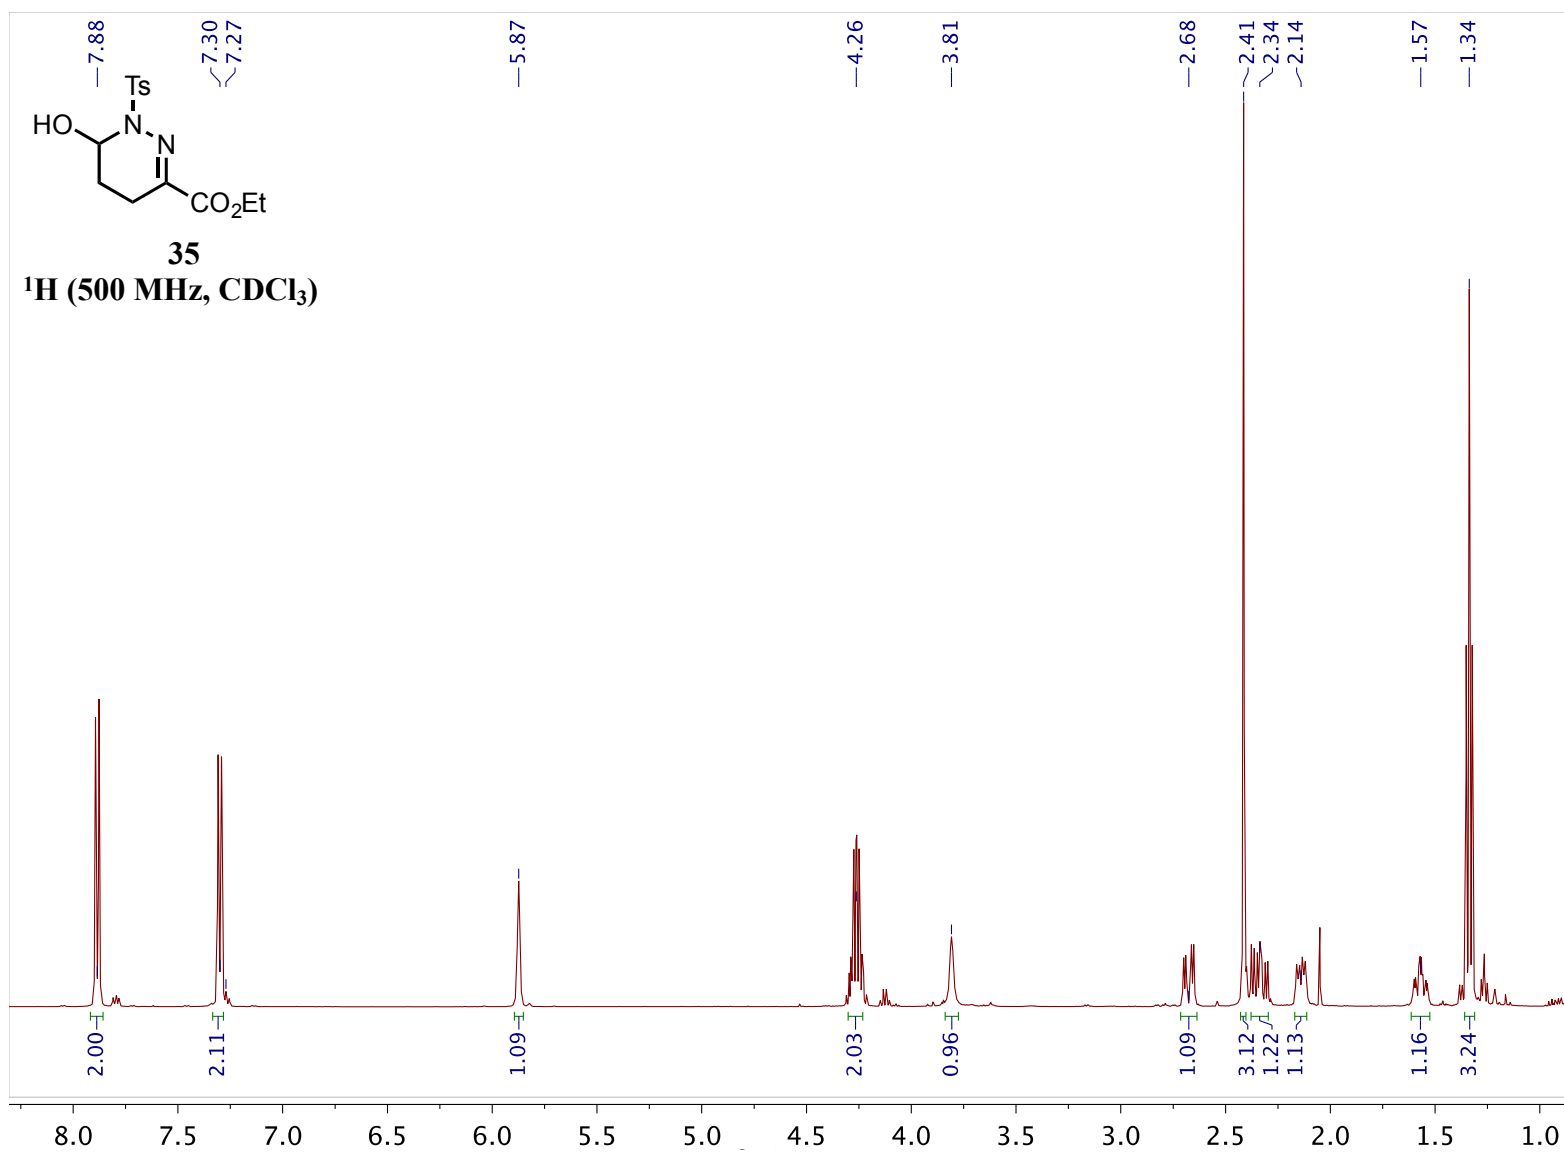

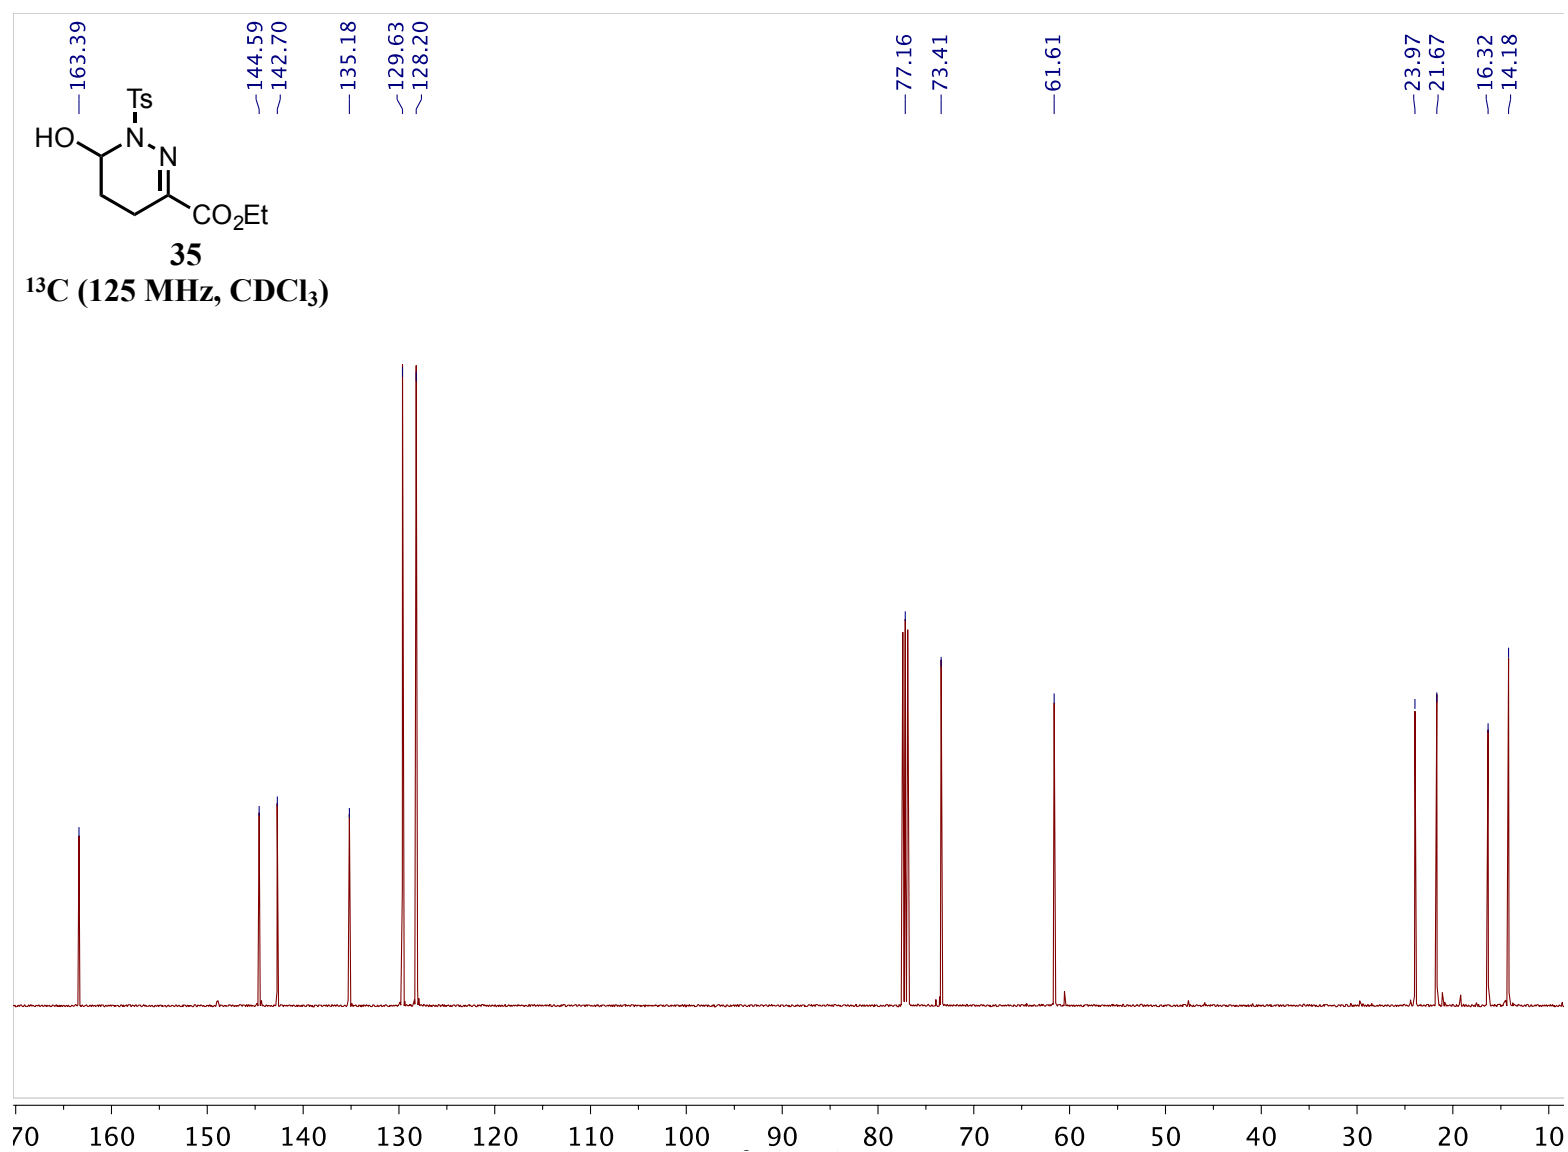

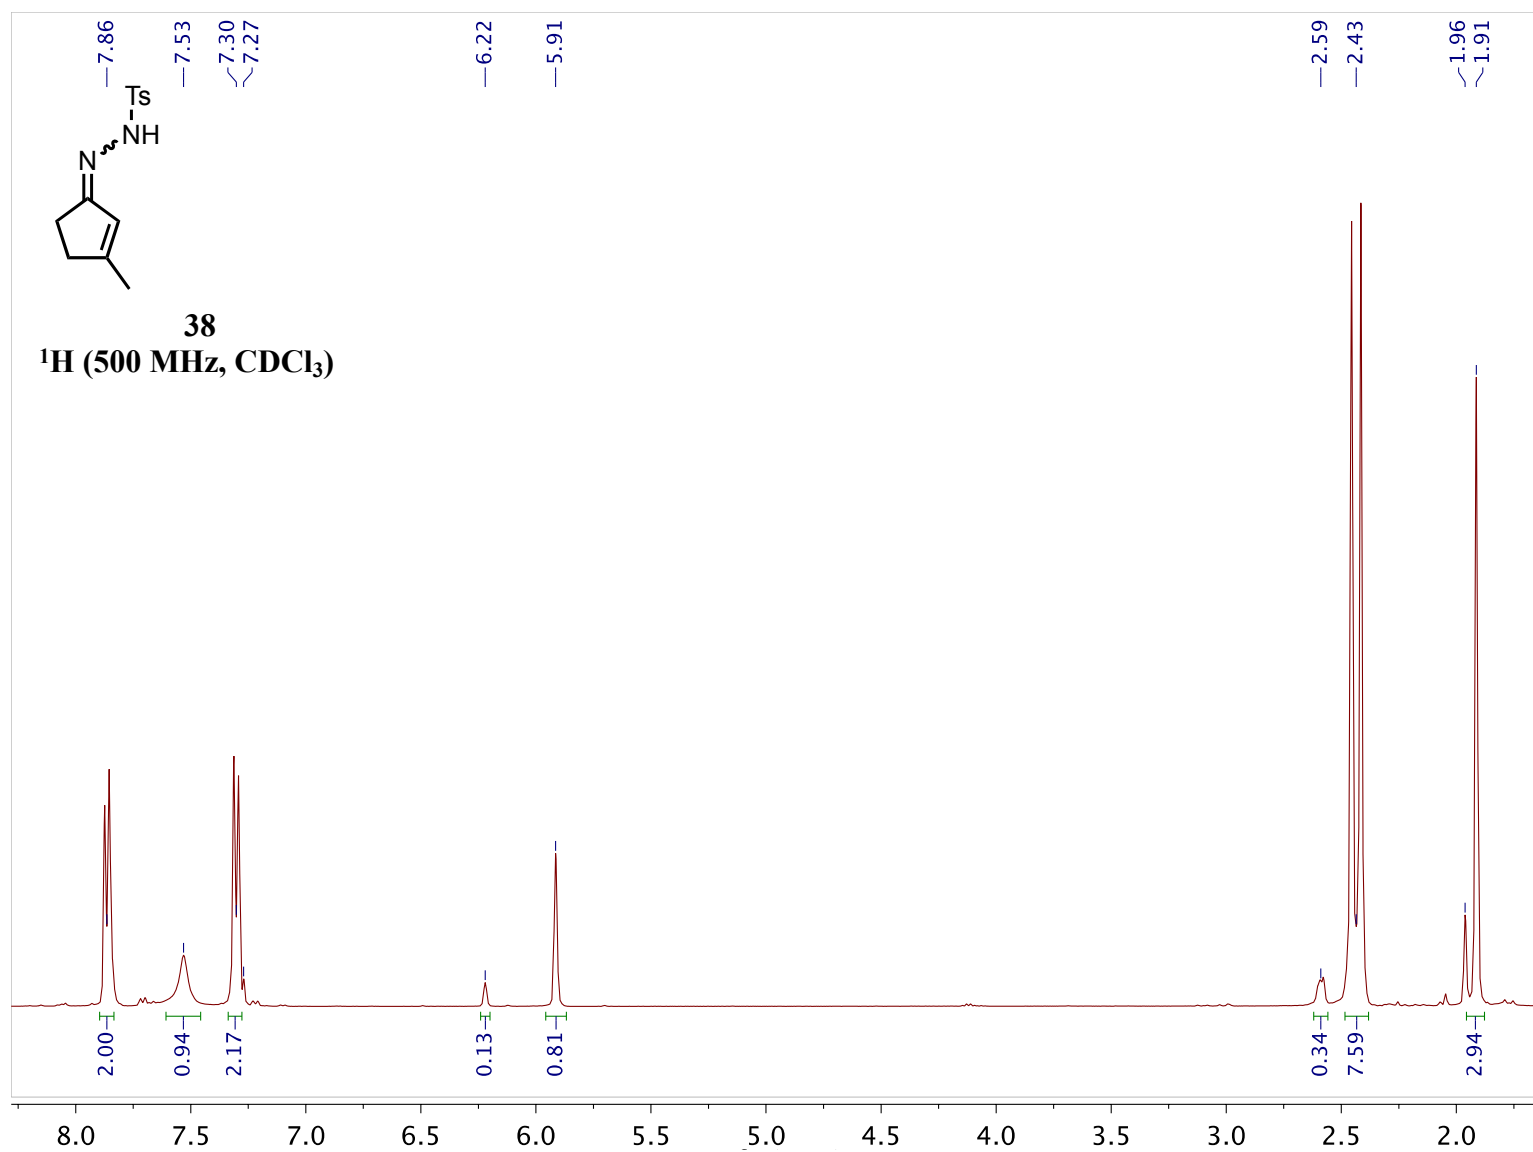

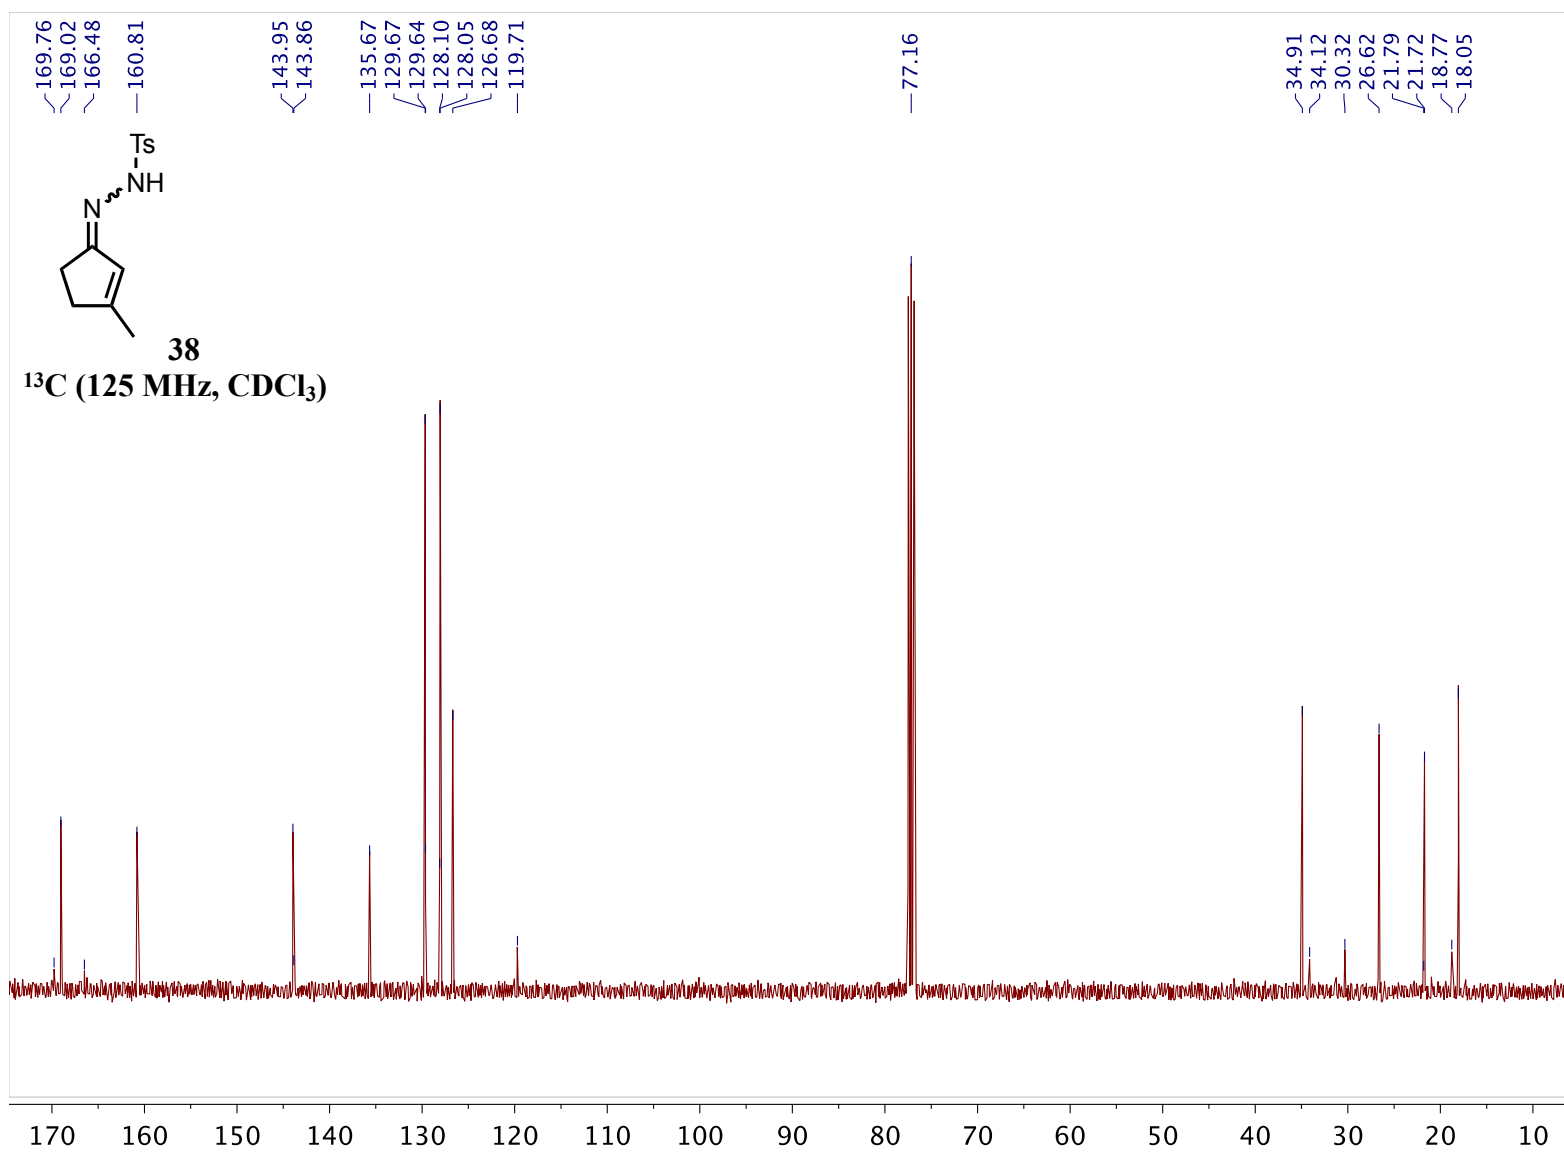

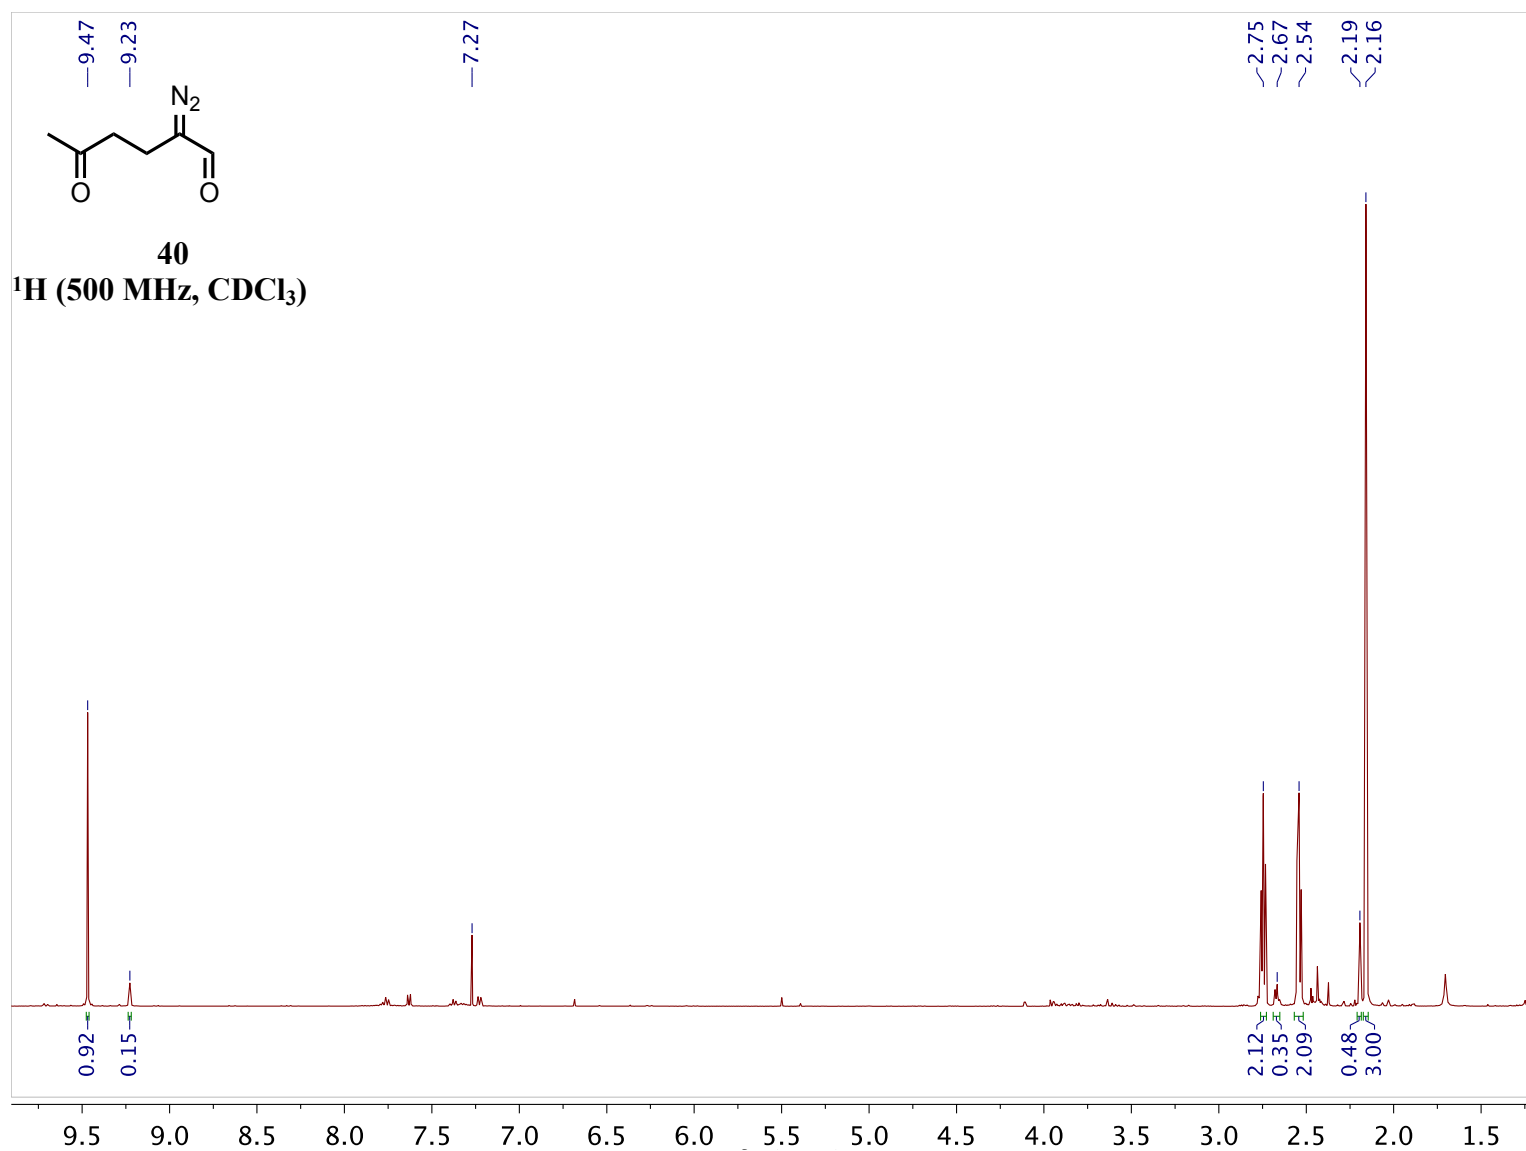

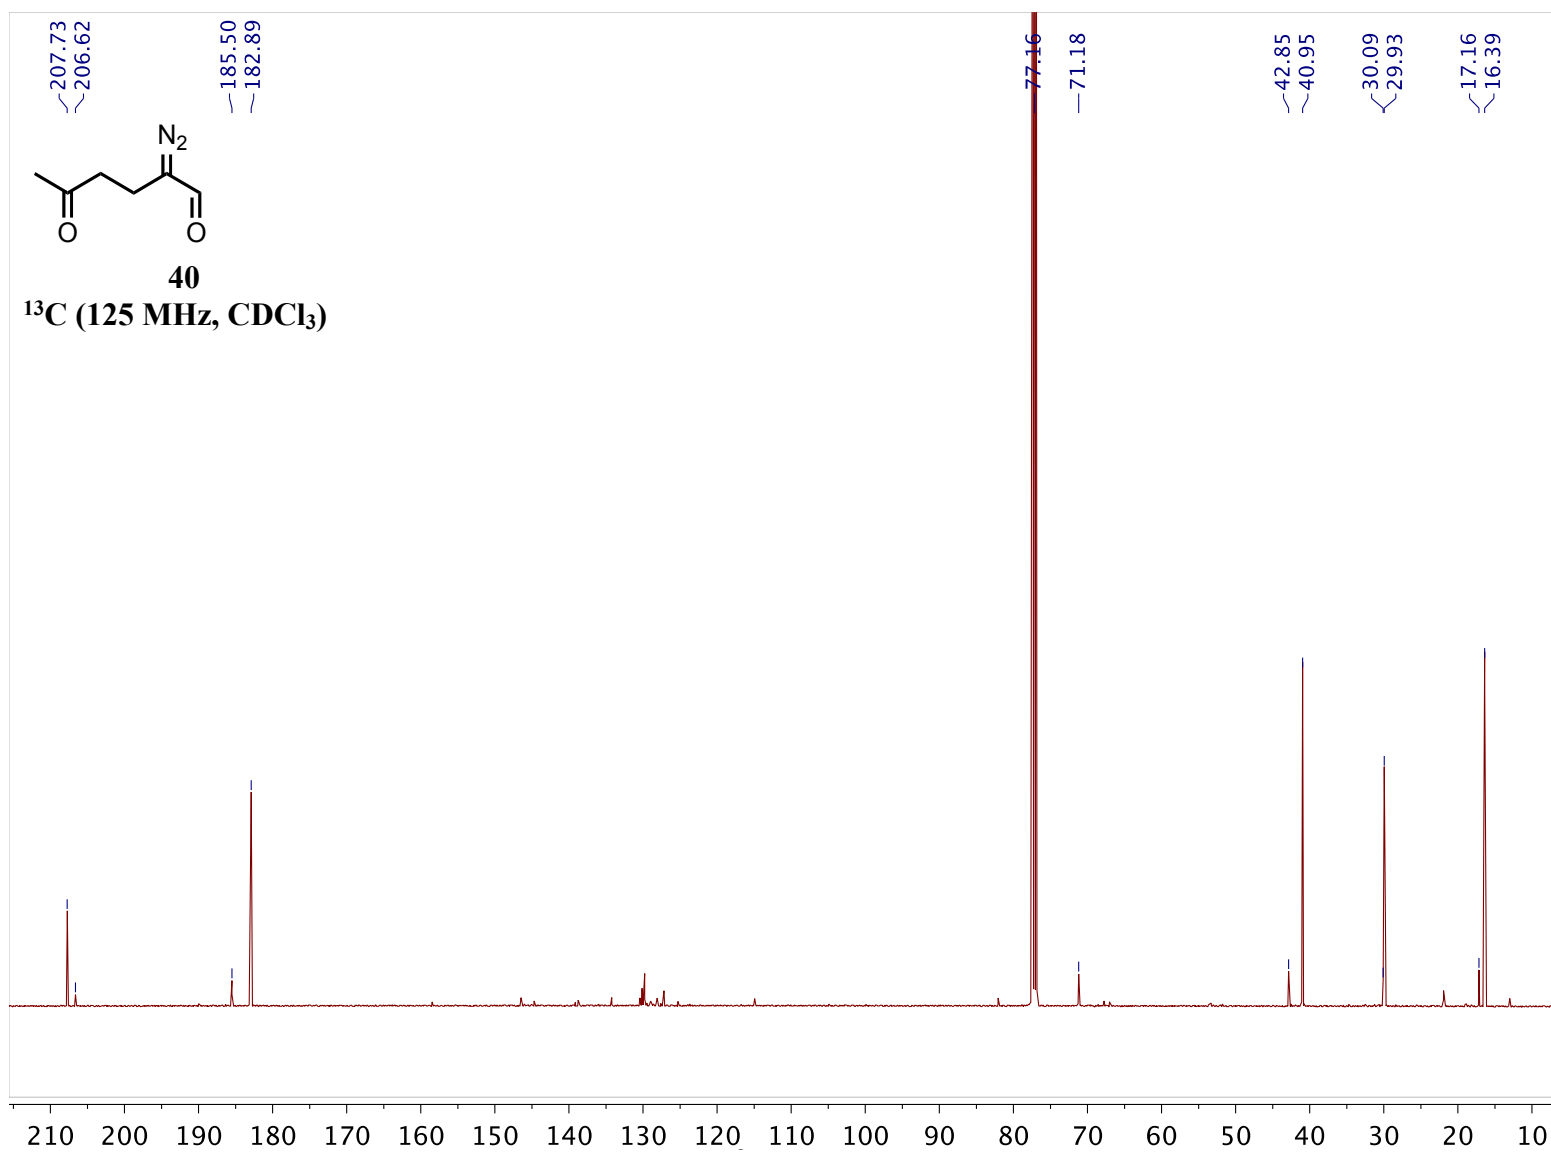

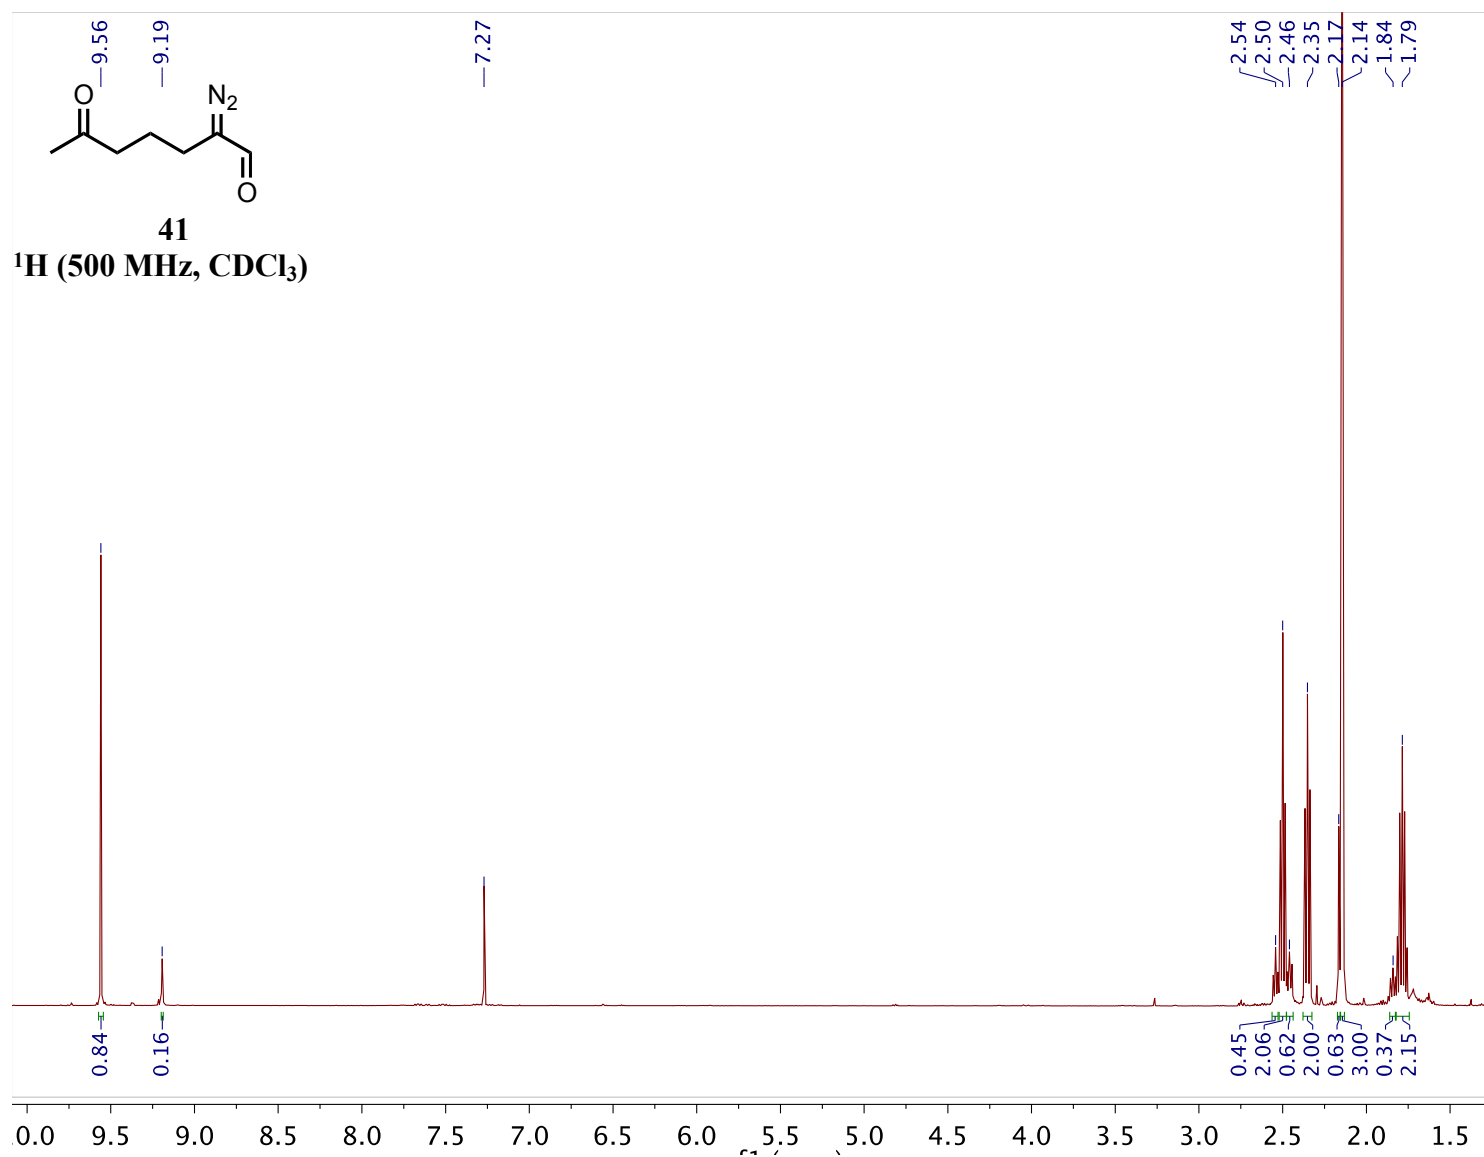

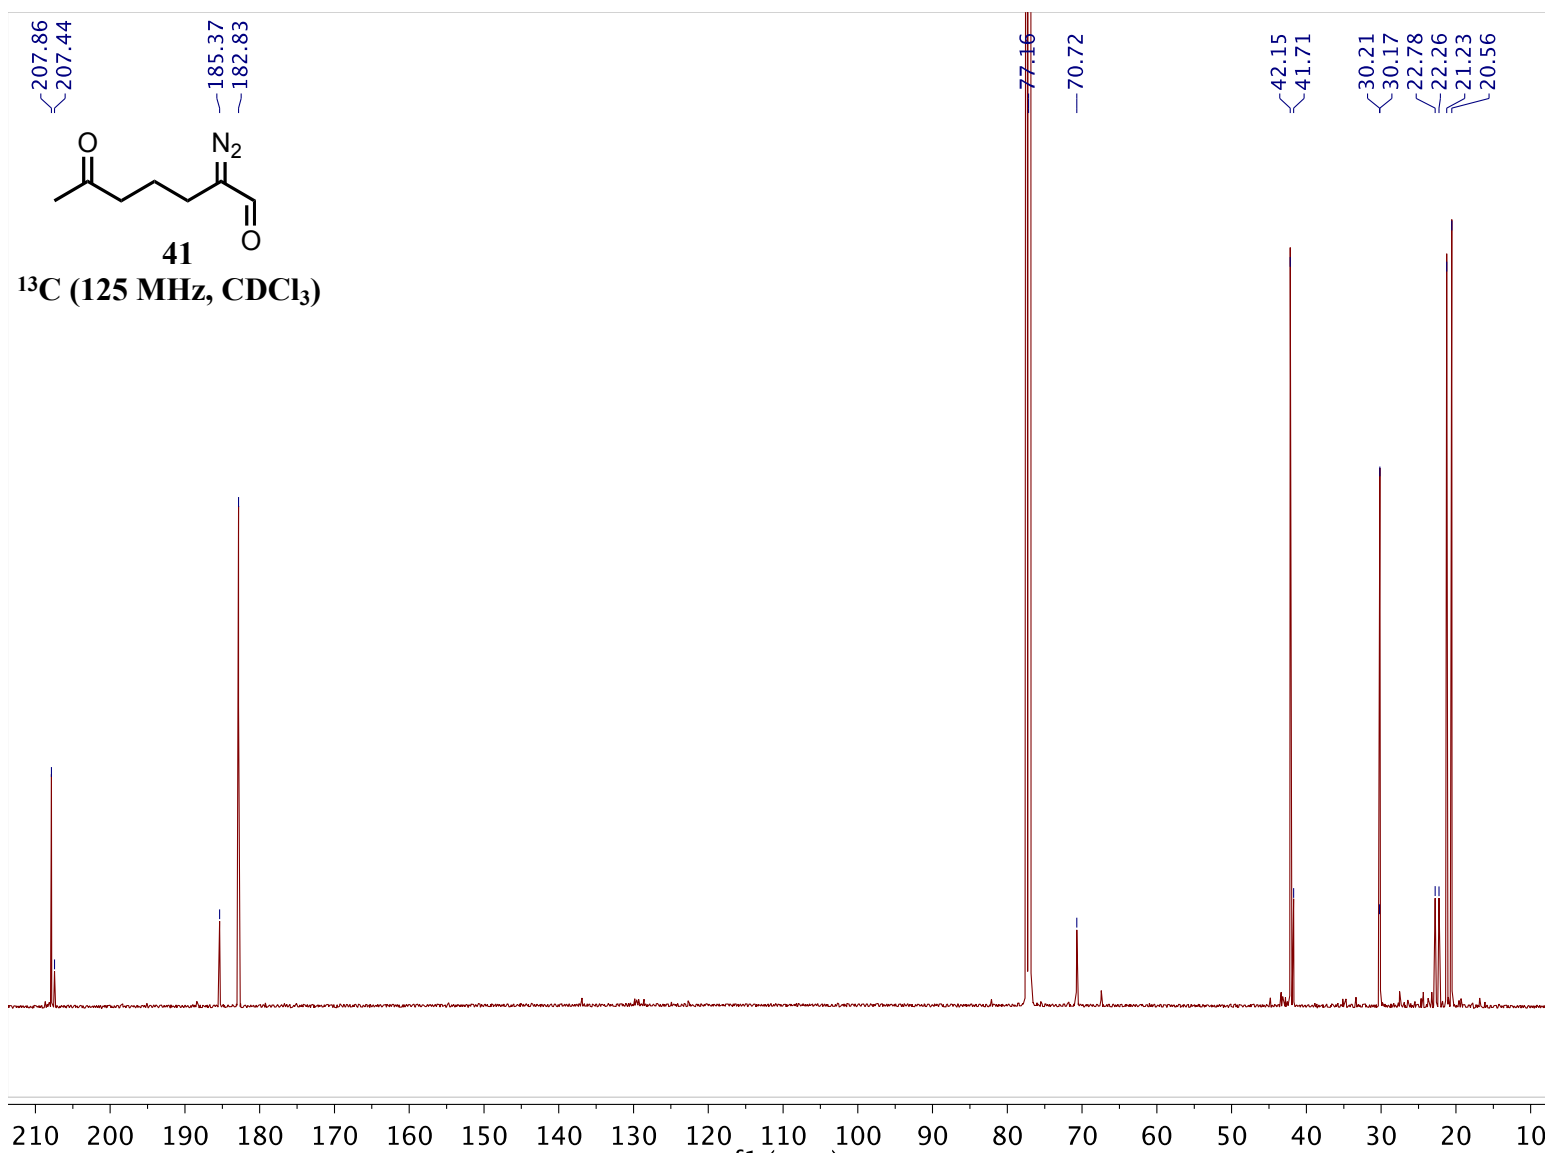



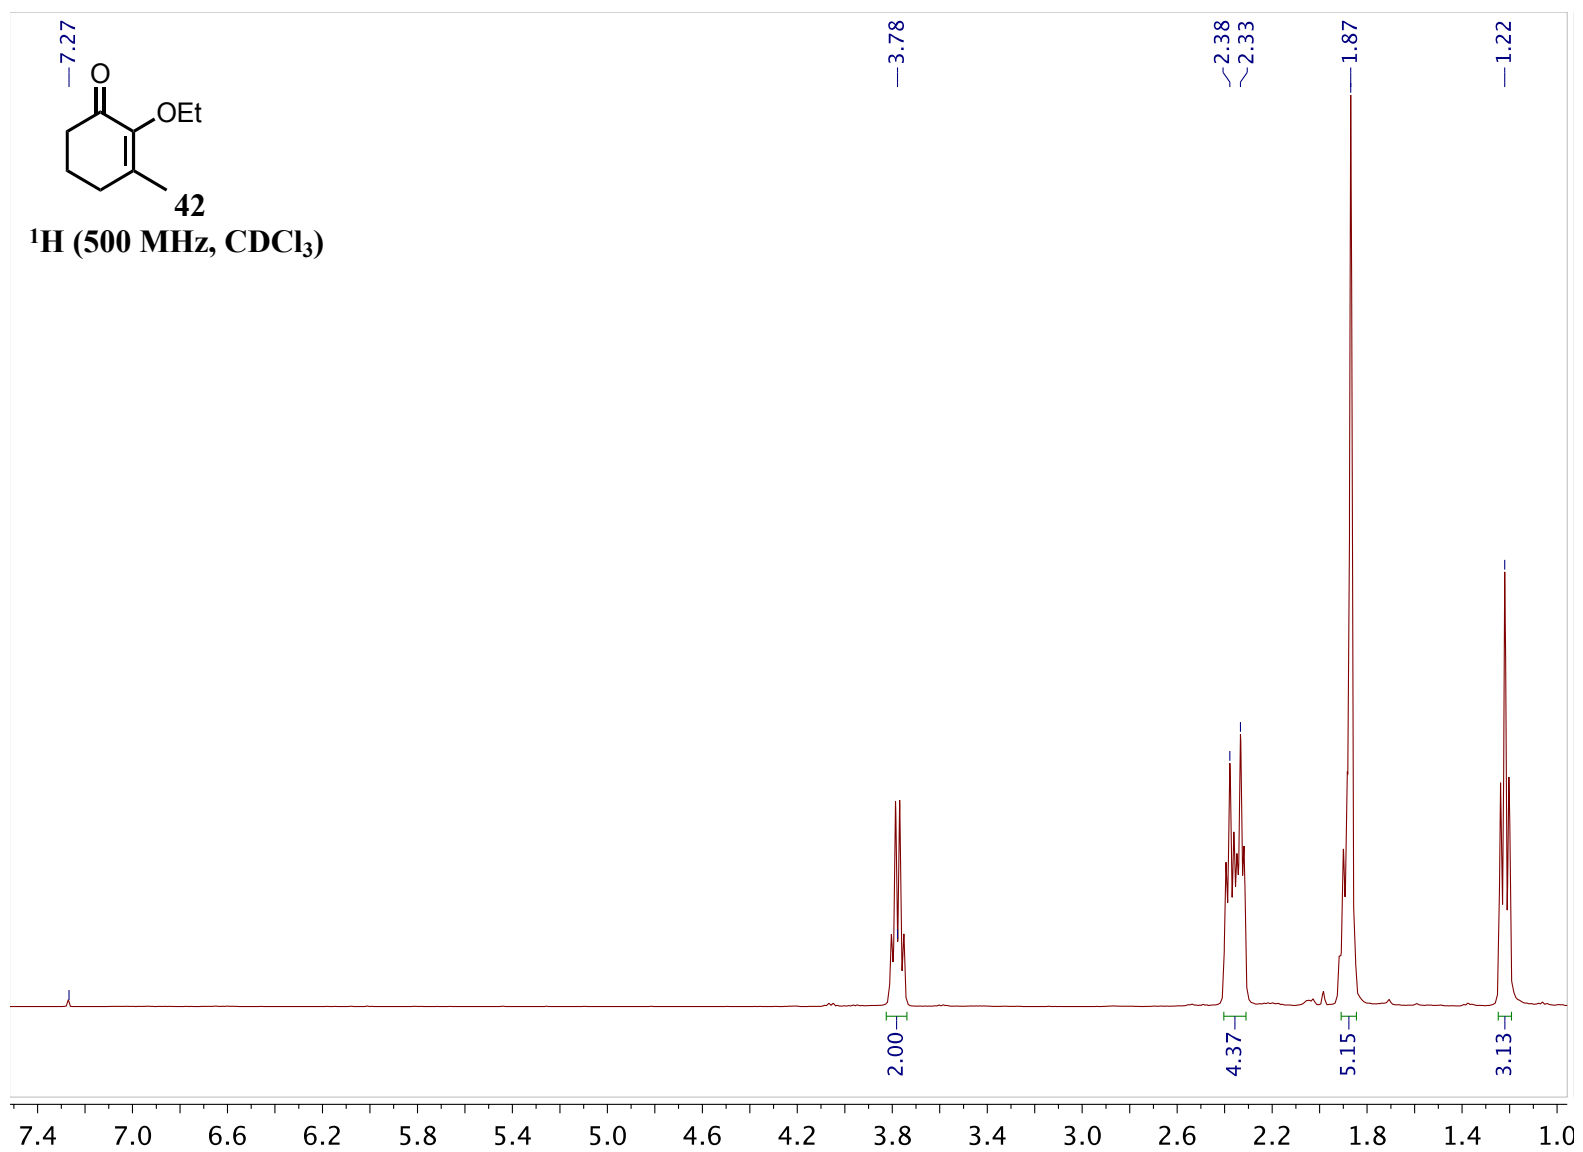

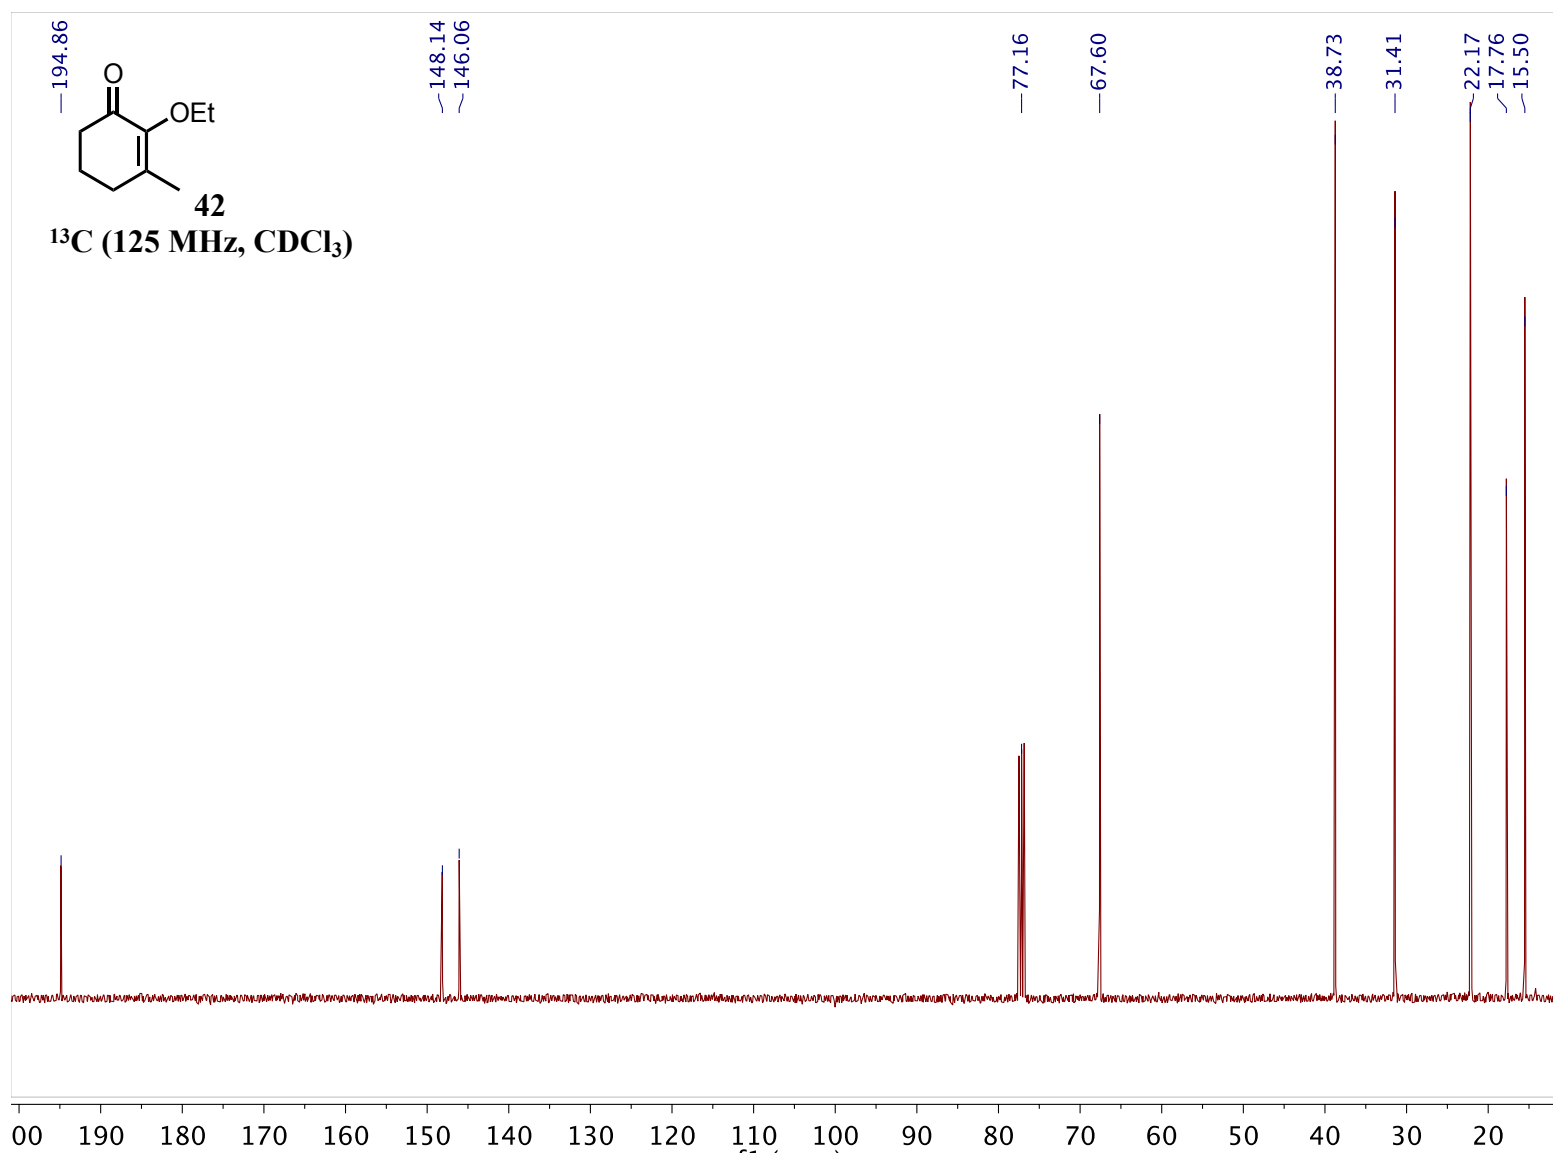

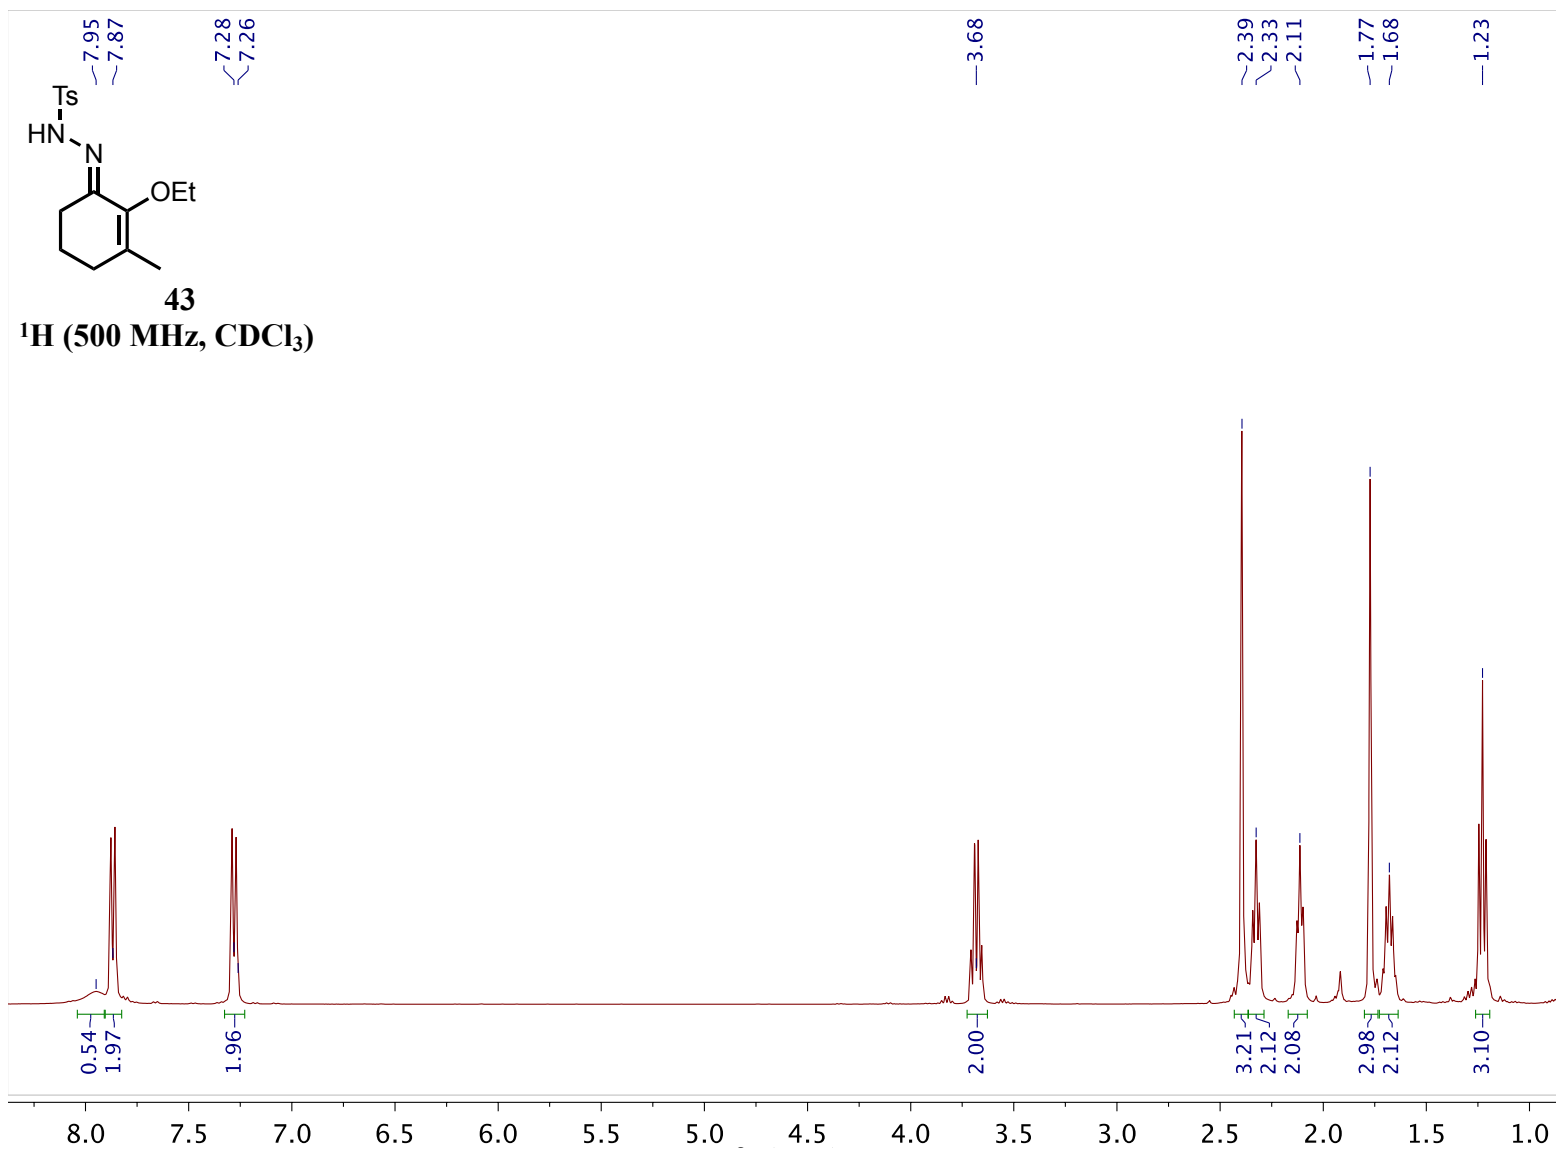

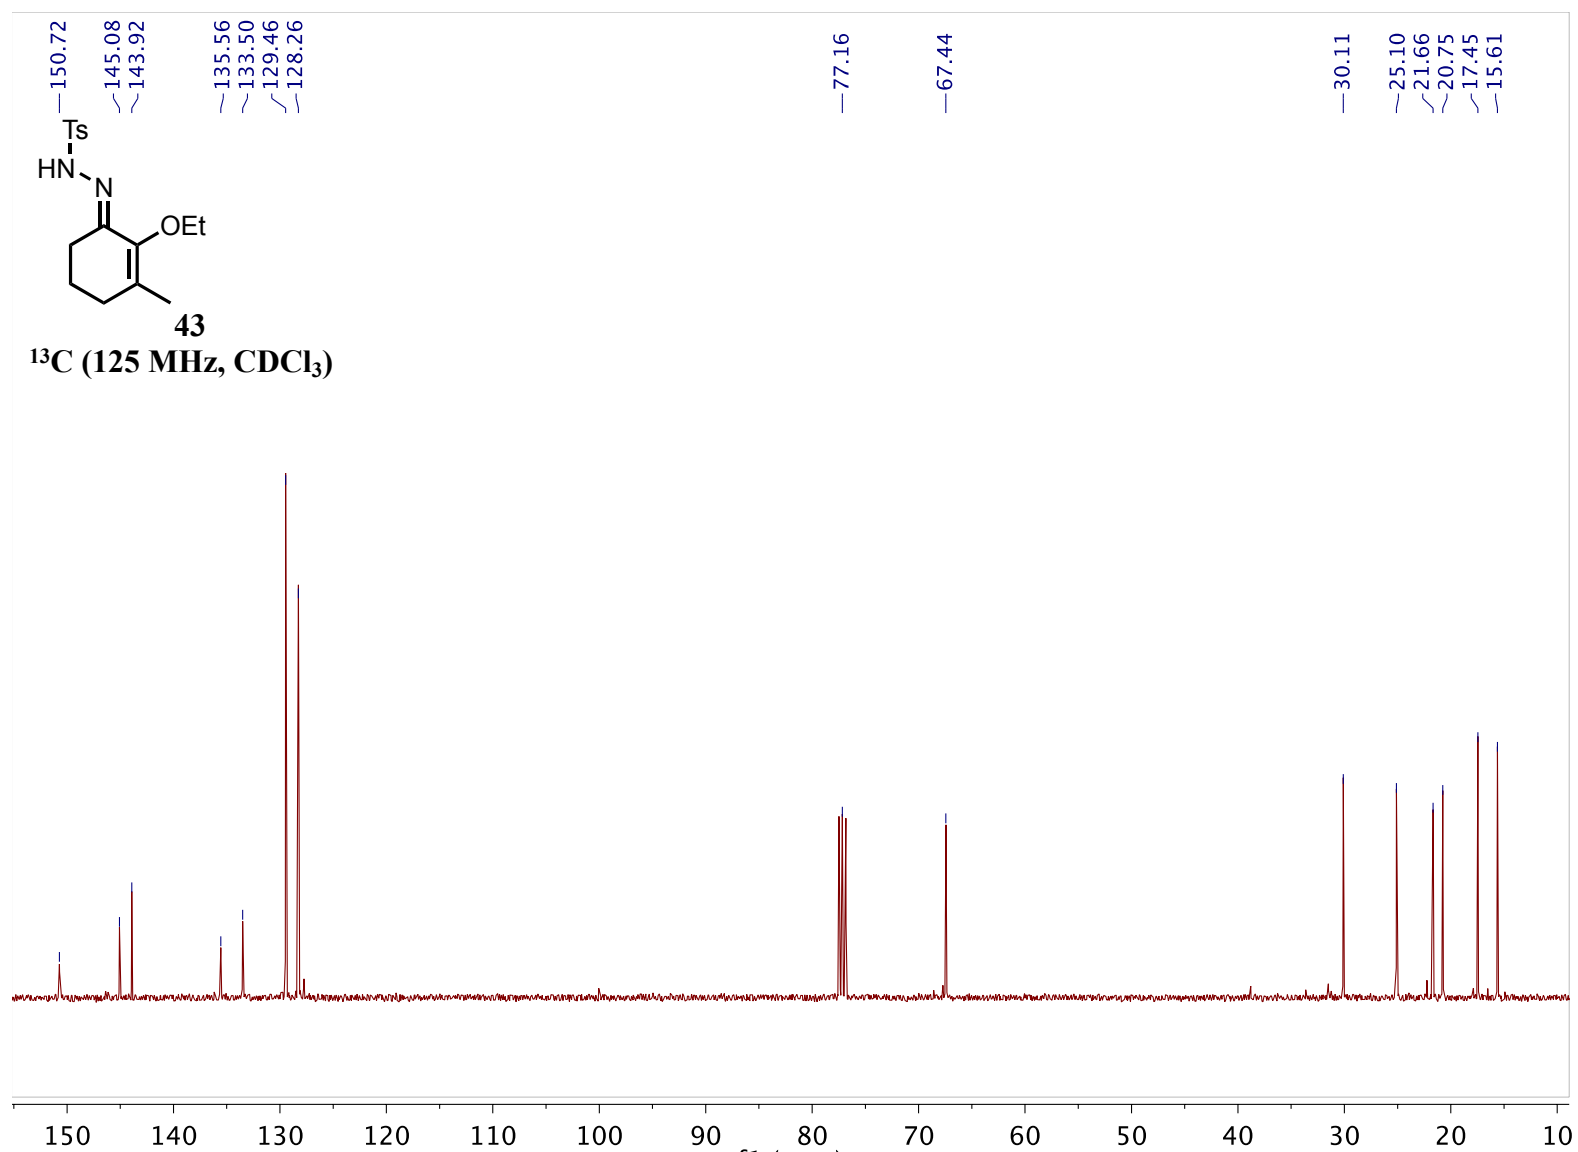

## References

---

1. L. Palatinus and G. Chapuis, *J. Appl. Cryst.*, 2007, **40**, 786.
2. (a) P. W. Betteridge, J. R. Carruthers, R. I. Cooper, K. Prout and D. J. Watkin, *J. Appl. Cryst.*, 2003, **36**, 1487; (b) R. I. Cooper, A. L. Thompson and D. J. Watkin, *J. Appl. Cryst.*, 2010, **43**, 1100.
